# Supplementary material for: Overrepresentation of Glutamate Signaling in Alzheimer's Disease: Network-Based Pathway Enrichment Using Meta-Analysis of Genome-Wide Association Studies
Source: PLoS One. 2014 Apr 22;9(4):e95413. doi: 10.1371/journal.pone.0095413 (PMC3995778; doi:10.1371/journal.pone.0095413)
Supplement: Table S1 — Meta-analysis associations (p-value <0,05) with additional annotations. (XLSX) [file pone.0095413.s004.xlsx]

## Sheet: Table S1
Table S1. Meta-analysis associations with additional annotations. (p-value<0.05)
CHR	BP	SNP	A1	A2	N	P	OR	Gene Name	strand	txStart	txEnd	Name
19	50087459	rs2075650	G	A	3	8.54e-116	4.4818	PVRL2	+	50041232	50084325	NM_001042724
19	50087459	rs2075650	G	A	3	8.54e-116	4.4818	TOMM40	+	50086316	50098786	NM_001128916
19	50087106	rs157580	G	A	2	9.6e-35	0.5078	PVRL2	+	50041232	50084325	NM_001042724
19	50087106	rs157580	G	A	2	9.6e-35	0.5078	TOMM40	+	50086316	50098786	NM_001128916
19	50106291	rs439401	T	C	2	8.82e-29	0.5392	APOE	+	50100878	50104490	NM_000041
19	50106291	rs439401	T	C	2	8.82e-29	0.5392	APOC1	+	50109760	50114446	NM_001645
19	50073874	rs6859	A	G	3	7.87e-28	1.7024	PVRL2	+	50041232	50084325	NM_001042724
19	50100676	rs405509	G	T	2	2.29e-27	0.573	TOMM40	+	50086316	50098786	NM_001128916
19	50100676	rs405509	G	T	2	2.29e-27	0.573	APOE	+	50100878	50104490	NM_000041
19	50093506	rs8106922	G	A	2	1.17e-25	0.566	TOMM40	+	50086316	50098786	NM_001128916
19	50021054	rs10402271	G	T	3	1.98e-17	1.4633	BCAM	+	50004155	50016518	NM_005581
19	50018504	rs10405693	T	C	2	2.83e-12	1.4914	BCAM	+	50004155	50016518	NM_005581
19	50074901	rs3852861	T	G	2	5.32e-11	0.6395	PVRL2	+	50041232	50084325	NM_001042724
19	49857752	rs714948	A	C	3	2.03e-10	1.5961	PVR	+	49838937	49861268	NM_001135768
19	49946008	rs8103315	A	C	2	1.87e-08	1.4969	BCL3	+	49943817	49955141	NM_005178
19	50054507	rs377702	A	G	3	1.99e-07	1.2884	PVRL2	+	50041232	50084325	NM_001042724
19	49933947	rs2927438	A	G	2	3.32e-07	1.3506	Intergenic
19	50421115	rs346763	A	G	2	3.67e-07	1.7964	EXOC3L2	-	50407718	50429309	NM_138568
12	93848520	rs249153	C	T	2	4.38e-07	1.4078	Intergenic
19	50053064	rs440277	A	G	2	4.79e-07	0.7558	PVRL2	+	50041232	50084325	NM_001042724
19	50043586	rs1871047	G	A	3	4.87e-07	0.7901	PVRL2	+	50041232	50084325	NM_001042724
5	30214770	rs13178362	C	T	3	6.6e-07	0.7466	Intergenic
12	93852604	rs249166	T	G	2	6.91e-07	1.4045	Intergenic
12	93854404	rs249167	A	T	2	6.91e-07	1.4045	Intergenic
19	50417946	rs10422797	C	T	2	1.02e-06	1.8169	EXOC3L2	-	50407718	50429309	NM_138568
11	59595197	rs474951	G	T	3	1.25e-06	0.7932	MS4A3	+	59580676	59595164	NM_006138
11	59593673	rs528823	T	C	3	1.55e-06	0.7946	MS4A3	+	59580676	59595164	NM_006138
3	10110577	rs1552244	G	A	3	1.63e-06	0.7577	FANCD2	+	10043112	10118614	NM_001018115
3	10110577	rs1552244	G	A	3	1.63e-06	0.7577	FANCD2OS	-	10098003	10124915	NM_173472
3	10108710	rs9849434	A	G	2	1.88e-06	0.7132	FANCD2	+	10043112	10118614	NM_001018115
3	10108710	rs9849434	A	G	2	1.88e-06	0.7132	FANCD2OS	-	10098003	10124915	NM_173472
3	10108949	rs9811771	G	A	2	1.88e-06	0.7132	FANCD2	+	10043112	10118614	NM_001018115
3	10108949	rs9811771	G	A	2	1.88e-06	0.7132	FANCD2OS	-	10098003	10124915	NM_173472
3	10108478	rs34632086	C	T	2	1.95e-06	0.7135	FANCD2	+	10043112	10118614	NM_001018115
3	10108478	rs34632086	C	T	2	1.95e-06	0.7135	FANCD2OS	-	10098003	10124915	NM_173472
16	83747731	rs2937145	A	C	2	2.02e-06	1.3489	Intergenic
16	83747051	rs8056715	G	C	2	2.19e-06	1.3533	Intergenic
3	10109766	rs12374115	T	C	2	2.22e-06	0.7125	FANCD2	+	10043112	10118614	NM_001018115
3	10109766	rs12374115	T	C	2	2.22e-06	0.7125	FANCD2OS	-	10098003	10124915	NM_173472
19	50018608	rs1871045	T	C	3	3.57e-06	0.8136	BCAM	+	50004155	50016518	NM_005581
3	10115115	rs2272123	A	G	3	4.35e-06	0.7657	FANCD2	+	10043112	10118614	NM_001018115
3	10115115	rs2272123	A	G	3	4.35e-06	0.7657	FANCD2OS	-	10098003	10124915	NM_173472
19	49929652	rs2965101	C	T	3	4.4e-06	0.7958	Intergenic
3	10113069	rs2272125	G	T	2	4.44e-06	0.7211	FANCD2	+	10043112	10118614	NM_001018115
3	10113069	rs2272125	G	T	2	4.44e-06	0.7211	FANCD2OS	-	10098003	10124915	NM_173472
3	10113189	rs2272124	C	T	2	4.44e-06	0.7211	FANCD2	+	10043112	10118614	NM_001018115
3	10113189	rs2272124	C	T	2	4.44e-06	0.7211	FANCD2OS	-	10098003	10124915	NM_173472
3	10115696	rs7647987	G	A	2	4.6e-06	0.7215	FANCD2	+	10043112	10118614	NM_001018115
3	10115696	rs7647987	G	A	2	4.6e-06	0.7215	FANCD2OS	-	10098003	10124915	NM_173472
3	10096922	rs6781811	T	C	2	4.62e-06	0.7215	FANCD2	+	10043112	10118614	NM_001018115
3	10096922	rs6781811	T	C	2	4.62e-06	0.7215	FANCD2OS	-	10098003	10124915	NM_173472
3	10053247	rs6442147	G	A	2	4.73e-06	0.7161	FANCD2	+	10043112	10118614	NM_001018115
3	10038960	rs7611218	C	T	2	5.12e-06	0.7203	CIDECP	-	10034236	10042820	NR_002786
3	10038960	rs7611218	C	T	2	5.12e-06	0.7203	FANCD2	+	10043112	10118614	NM_001018115
3	10118770	rs12152512	T	C	2	5.13e-06	0.7226	FANCD2	+	10043112	10118614	NM_001018115
3	10118770	rs12152512	T	C	2	5.13e-06	0.7226	FANCD2OS	-	10098003	10124915	NM_173472
3	10099444	rs6791810	T	C	2	5.18e-06	0.7191	FANCD2	+	10043112	10118614	NM_001018115
3	10099444	rs6791810	T	C	2	5.18e-06	0.7191	FANCD2OS	-	10098003	10124915	NM_173472
3	10126138	rs7652935	C	T	2	5.32e-06	0.723	FANCD2OS	-	10098003	10124915	NM_173472
3	10128141	rs41520445	T	G	2	5.32e-06	0.723	FANCD2OS	-	10098003	10124915	NM_173472
3	10128141	rs41520445	T	G	2	5.32e-06	0.723	BRK1	+	10132332	10143874	NM_018462
11	1971285	rs217228	T	C	3	5.37e-06	0.807	MRPL23-AS1	-	1961014	1967726	NR_024471
11	1971285	rs217228	T	C	3	5.37e-06	0.807	H19	-	1972981	1975641	NR_002196
11	1971285	rs217228	T	C	3	5.37e-06	0.807	MIR675	-	1974564	1974637	NR_030533
3	10097575	rs6442150	C	T	2	5.4e-06	0.7232	FANCD2	+	10043112	10118614	NM_001018115
3	10097575	rs6442150	C	T	2	5.4e-06	0.7232	FANCD2OS	-	10098003	10124915	NM_173472
3	10101312	rs13319597	T	G	2	5.42e-06	0.7232	FANCD2	+	10043112	10118614	NM_001018115
3	10101312	rs13319597	T	G	2	5.42e-06	0.7232	FANCD2OS	-	10098003	10124915	NM_173472
3	10099120	rs6789156	A	G	2	5.77e-06	0.7239	FANCD2	+	10043112	10118614	NM_001018115
3	10099120	rs6789156	A	G	2	5.77e-06	0.7239	FANCD2OS	-	10098003	10124915	NM_173472
3	10128559	rs17032396	A	G	2	5.86e-06	0.7241	FANCD2OS	-	10098003	10124915	NM_173472
3	10128559	rs17032396	A	G	2	5.86e-06	0.7241	BRK1	+	10132332	10143874	NM_018462
7	18772473	rs6958865	G	A	3	5.96e-06	0.5689	Intergenic
3	10043572	rs3846177	T	G	2	6.03e-06	0.7244	CIDECP	-	10034236	10042820	NR_002786
3	10043572	rs3846177	T	G	2	6.03e-06	0.7244	FANCD2	+	10043112	10118614	NM_001018115
3	10128842	rs6764068	G	A	2	6.04e-06	0.7244	FANCD2OS	-	10098003	10124915	NM_173472
3	10128842	rs6764068	G	A	2	6.04e-06	0.7244	BRK1	+	10132332	10143874	NM_018462
3	10133302	rs17032414	G	C	2	6.26e-06	0.7248	BRK1	+	10132332	10143874	NM_018462
19	50019299	rs4803759	T	C	2	6.38e-06	0.7604	BCAM	+	50004155	50016518	NM_005581
3	10048311	rs7648104	A	C	2	6.41e-06	0.7251	FANCD2	+	10043112	10118614	NM_001018115
3	10052955	rs17032278	G	A	2	6.41e-06	0.7251	FANCD2	+	10043112	10118614	NM_001018115
3	10035425	rs6804473	T	C	3	6.45e-06	0.7688	CIDECP	-	10034236	10042820	NR_002786
3	10053816	rs7631678	G	T	2	6.61e-06	0.7254	FANCD2	+	10043112	10118614	NM_001018115
3	10055722	rs7637888	C	T	2	6.61e-06	0.7254	FANCD2	+	10043112	10118614	NM_001018115
2	127611085	rs744373	G	A	3	6.88e-06	1.2552	Intergenic
3	10062638	rs17032299	T	C	2	7.03e-06	0.7261	FANCD2	+	10043112	10118614	NM_001018115
3	10064773	rs7615646	C	A	3	7.08e-06	0.7697	FANCD2	+	10043112	10118614	NM_001018115
3	9990740	rs3732966	T	C	3	7.23e-06	0.7759	EMC3	-	9980635	10003522	NM_018447
3	10061680	rs17032295	A	G	2	7.24e-06	0.7264	FANCD2	+	10043112	10118614	NM_001018115
3	10056545	rs17032283	C	G	2	7.51e-06	0.7245	FANCD2	+	10043112	10118614	NM_001018115
20	50221424	rs6091465	A	C	2	7.76e-06	1.2777	ZFP64	-	50133956	50241931	NM_199427
7	45357340	rs1969510	A	G	3	8.95e-06	0.7781	Intergenic
4	143664194	rs13107432	G	A	2	9.19e-06	0.7645	INPP4B	-	143168631	143987054	NM_003866
4	125665664	rs312489	C	T	2	9.6e-06	1.2762	Intergenic
5	101372032	rs4419568	G	A	2	9.63e-06	0.7901	Intergenic
11	59787033	rs1026254	T	C	2	9.63e-06	0.7852	Intergenic
3	10004289	rs3755783	G	A	3	9.79e-06	0.7781	EMC3	-	9980635	10003522	NM_018447
10	33505043	rs2506135	C	T	2	9.85e-06	1.292	NRP1	-	33506424	33663839	NM_001244973
10	33506049	rs2506137	T	C	2	1.02e-05	1.2914	NRP1	-	33506424	33663839	NM_001244973
3	10058935	rs9875081	A	G	3	1.03e-05	0.774	FANCD2	+	10043112	10118614	NM_001018115
4	20458023	rs7682014	G	A	3	1.07e-05	1.2418	KCNIP4	-	20339336	21559472	NM_147182
12	32685867	rs10844268	C	A	2	1.17e-05	1.2818	FGD4	+	32546307	32690251	NM_139241
11	59778524	rs1582763	A	G	2	1.18e-05	0.7807	Intergenic
11	59616152	rs2847666	G	A	3	1.2e-05	0.8264	MS4A2	+	59612712	59622516	NM_000139
5	101395162	rs881236	A	C	2	1.24e-05	0.7933	Intergenic
11	59786525	rs1026255	G	A	2	1.32e-05	0.7882	Intergenic
3	9976772	rs17050660	T	C	2	1.33e-05	0.74	EMC3	-	9980635	10003522	NM_018447
16	83743765	rs1472541	T	C	2	1.33e-05	1.3237	LOC400548	+	83728256	83740550	NR_033984
11	59791005	rs4938933	C	T	2	1.35e-05	0.7884	Intergenic
10	33507327	rs1044210	T	G	2	1.36e-05	1.2908	NRP1	-	33506424	33663839	NM_001244973
5	106841989	rs27750	T	C	2	1.39e-05	1.3139	EFNA5	-	106740488	107034495	NM_001962
3	170367722	rs9809961	C	T	3	1.49e-05	1.2777	MECOM	-	170283980	170864257	NM_004991
11	59731654	rs7929589	T	C	3	1.53e-05	0.8268	Intergenic
3	9990437	rs3732967	C	T	2	1.54e-05	0.7398	EMC3	-	9980635	10003522	NM_018447
3	9985308	rs13063929	C	T	2	1.55e-05	0.7398	EMC3	-	9980635	10003522	NM_018447
3	9988273	rs3732968	G	A	2	1.55e-05	0.7398	EMC3	-	9980635	10003522	NM_018447
4	125685592	rs7674724	C	T	2	1.59e-05	1.2873	Intergenic
11	59636614	rs540170	C	T	3	1.59e-05	1.2048	Intergenic
5	30243555	rs13177282	A	G	3	1.71e-05	0.7602	Intergenic
11	59785516	rs1530914	C	T	2	1.71e-05	0.7906	Intergenic
3	9995622	rs7633769	T	C	2	1.72e-05	0.741	EMC3	-	9980635	10003522	NM_018447
3	153547210	rs1382	G	C	2	1.78e-05	0.7804	MBNL1	+	153468518	153666258	NM_021038
3	153536912	rs6440796	G	A	2	1.79e-05	0.7815	MBNL1	+	153468518	153666258	NM_021038
3	153536912	rs6440796	G	A	2	1.79e-05	0.7815	TMEM14E	-	153540176	153541469	NM_001123228
9	20703068	rs4977831	A	G	2	1.85e-05	0.6574	FOCAD	+	20648308	20985954	NM_017794
9	20703068	rs4977831	A	G	2	1.85e-05	0.6574	MIR491	+	20706103	20706187	NR_030166
11	59836227	rs10792263	C	T	3	1.88e-05	0.8267	MS4A4A	+	59804589	59833021	NM_024021
11	59782141	rs6591559	A	G	2	1.94e-05	0.7918	Intergenic
11	59638882	rs581133	A	G	3	2.02e-05	1.202	Intergenic
9	80781360	rs10867325	G	A	2	2.06e-05	1.4989	Intergenic
4	20449192	rs10938807	T	C	3	2.07e-05	1.2381	KCNIP4	-	20339336	21559472	NM_147182
11	59784718	rs7108663	C	T	2	2.15e-05	0.7928	Intergenic
8	47048338	rs35526436	A	G	2	2.16e-05	0.4096	Intergenic
3	10007259	rs13089863	G	T	2	2.19e-05	0.7428	EMC3	-	9980635	10003522	NM_018447
3	10020030	rs13066757	A	C	2	2.19e-05	0.7428	LOC401052	-	10023101	10027779	NM_001008737
4	125682983	rs7666278	A	G	2	2.19e-05	1.2804	Intergenic
11	59602405	rs543695	A	C	3	2.19e-05	0.8221	Intergenic
11	61983883	rs1783180	T	C	2	2.25e-05	0.6904	AHNAK	-	61957589	62070908	NM_024060
11	59783189	rs4938931	G	T	2	2.31e-05	0.7936	Intergenic
4	125682475	rs6821572	G	A	2	2.34e-05	1.2793	Intergenic
3	67003832	rs1563441	G	A	3	2.36e-05	0.7872	Intergenic
11	59779663	rs1562990	C	A	3	2.36e-05	0.8304	Intergenic
11	59695883	rs610932	G	T	3	2.41e-05	1.2031	MS4A6A	-	59695655	59708715	NM_152852
3	153491080	rs12492498	G	A	2	2.48e-05	0.7781	MBNL1	+	153468518	153666258	NM_021038
6	159835815	rs240863	A	G	2	2.5e-05	0.695	Intergenic
12	93849013	rs249155	G	A	2	2.56e-05	1.2808	Intergenic
11	59718742	rs7926344	G	A	3	2.71e-05	1.2027	Intergenic
16	83759471	rs4636894	C	T	2	2.71e-05	1.2998	Intergenic
11	59770433	rs655231	G	A	2	2.93e-05	0.7959	Intergenic
1	188979923	rs573068	A	G	3	2.95e-05	0.8306	LOC440704	+	188860642	189037411	NR_033922
13	100394323	rs9513824	C	T	3	2.96e-05	1.1976	NALCN-AS1	+	100158579	100509639	NR_047687
11	59746006	rs2081547	T	C	2	3.08e-05	0.7964	Intergenic
3	66999473	rs6794835	G	A	3	3.09e-05	0.7903	Intergenic
3	153499659	rs1426383	T	C	2	3.09e-05	0.7804	MBNL1	+	153468518	153666258	NM_021038
13	41234080	rs9566845	A	G	2	3.12e-05	0.5809	VWA8	-	41038960	41433221	NM_015058
19	49740163	rs1727748	C	T	3	3.3e-05	0.7858	CEACAM22P	-	49732884	49751990	NR_027754
11	1874448	rs7102920	G	A	3	3.43e-05	0.8244	LSP1	+	1830775	1870069	NM_002339
5	141099224	rs32926	T	C	2	3.52e-05	0.7977	Intergenic
19	50328041	rs1114832	T	C	3	3.55e-05	1.3277	PPP1R37	+	50288270	50342383	NM_019121
5	10201421	rs6884905	T	C	2	3.64e-05	0.7333	Intergenic
13	41164889	rs7140090	C	T	2	3.7e-05	0.6095	VWA8	-	41038960	41433221	NM_015058
19	50062694	rs416041	G	A	2	3.78e-05	1.304	PVRL2	+	50041232	50084325	NM_001042724
8	118041376	rs3020114	G	A	2	3.82e-05	1.268	SLC30A8	+	118031692	118258134	NM_001172811
8	118044334	rs3020116	G	T	2	3.82e-05	1.268	SLC30A8	+	118031692	118258134	NM_001172811
13	100398863	rs9518226	T	C	3	3.84e-05	0.8377	NALCN-AS1	+	100158579	100509639	NR_047687
8	43881838	rs8185786	C	T	2	3.89e-05	0.751	Intergenic
11	59699333	rs662196	T	C	3	3.9e-05	1.1961	MS4A6A	-	59695655	59708715	NM_152852
13	41361833	rs10507501	T	C	2	3.98e-05	0.5893	VWA8	-	41038960	41433221	NM_015058
16	83739456	rs9933007	T	C	2	4.08e-05	1.3014	LOC400548	+	83728256	83740550	NR_033984
13	41283446	rs9562353	C	T	2	4.1e-05	0.5881	VWA8	-	41038960	41433221	NM_015058
13	41291885	rs17595042	T	A	2	4.25e-05	0.5905	VWA8	-	41038960	41433221	NM_015058
8	118029395	rs3020107	A	G	2	4.54e-05	1.2674	AARD	+	118019644	118025420	NM_001025357
8	118029395	rs3020107	A	G	2	4.54e-05	1.2674	SLC30A8	+	118031692	118258134	NM_001172811
16	83747392	rs2937143	A	G	2	4.55e-05	1.291	Intergenic
13	41296275	rs9562355	A	G	2	4.64e-05	0.592	VWA8	-	41038960	41433221	NM_015058
5	117833536	rs4073021	A	G	2	4.71e-05	0.7705	Intergenic
8	5862903	rs1424724	T	C	3	4.72e-05	1.2379	Intergenic
4	20446009	rs2130920	T	C	3	4.73e-05	1.2369	KCNIP4	-	20339336	21559472	NM_147182
18	48439455	rs17749090	C	T	3	4.75e-05	0.7319	DCC	+	48120539	49316271	NM_005215
1	10425297	rs2847337	A	G	2	4.8e-05	0.6597	APITD1-CORT	+	10412745	10434647	NM_001270517
1	10425297	rs2847337	A	G	2	4.8e-05	0.6597	APITD1	+	10412745	10425459	NM_199294
1	10429823	rs1307489	A	G	2	4.8e-05	0.6597	APITD1-CORT	+	10412745	10434647	NM_001270517
1	10429823	rs1307489	A	G	2	4.8e-05	0.6597	APITD1	+	10412745	10425459	NM_199294
1	10429823	rs1307489	A	G	2	4.8e-05	0.6597	CORT	+	10432362	10434647	NM_001302
13	41326899	rs9566867	A	G	2	4.89e-05	0.593	VWA8	-	41038960	41433221	NM_015058
13	41329100	rs7993467	C	T	2	4.89e-05	0.593	VWA8	-	41038960	41433221	NM_015058
10	61392279	rs7078432	T	G	3	5e-05	0.8413	C10orf40	-	61387980	61390677	NR_024340
13	103079107	rs7335085	A	G	2	5.14e-05	0.6111	Intergenic
1	10431266	rs1307490	T	C	2	5.17e-05	0.6617	APITD1-CORT	+	10412745	10434647	NM_001270517
1	10431266	rs1307490	T	C	2	5.17e-05	0.6617	CORT	+	10432362	10434647	NM_001302
5	30431609	rs12654311	A	G	3	5.17e-05	0.5684	Intergenic
13	103075180	rs7320001	G	A	2	5.17e-05	0.6097	Intergenic
1	10432290	rs1307494	C	T	2	5.27e-05	0.662	APITD1-CORT	+	10412745	10434647	NM_001270517
1	10432290	rs1307494	C	T	2	5.27e-05	0.662	CORT	+	10432362	10434647	NM_001302
1	215998288	rs10495074	A	G	3	5.32e-05	0.8416	SPATA17	+	215871317	216107107	NM_138796
11	59759511	rs718376	A	G	2	5.37e-05	0.7974	Intergenic
14	26633980	rs9323908	C	T	2	5.44e-05	1.4153	Intergenic
2	127606107	rs7561528	A	G	2	5.47e-05	1.2705	Intergenic
2	200857196	rs11691757	T	C	3	5.54e-05	1.2219	Intergenic
4	125657857	rs312504	A	T	2	5.54e-05	1.2437	Intergenic
6	77343363	rs4291070	A	G	3	5.58e-05	0.8415	Intergenic
14	20151498	rs1756548	C	A	2	5.61e-05	1.3784	Intergenic
10	33504958	rs2506134	G	A	2	5.85e-05	1.2435	NRP1	-	33506424	33663839	NM_001244973
7	18761775	rs17139817	G	T	3	5.88e-05	0.601	Intergenic
9	136484947	rs4565533	G	A	2	5.88e-05	0.6663	Intergenic
5	30030666	rs7443690	G	A	2	6.04e-05	1.2523	Intergenic
6	148333734	rs9322114	C	T	3	6.11e-05	0.8091	Intergenic
15	90459856	rs16974268	C	T	2	6.17e-05	0.7572	SLCO3A1	+	90197941	90516669	NM_001145044
4	125638693	rs17768496	C	T	2	6.21e-05	1.2713	Intergenic
8	109595904	rs1789964	A	G	2	6.33e-05	0.736	Intergenic
12	32668629	rs11052110	A	G	2	6.35e-05	1.2578	FGD4	+	32546307	32690251	NM_139241
8	47043522	rs2353199	T	C	2	6.39e-05	0.4536	Intergenic
12	32655451	rs10844253	A	G	2	6.39e-05	1.2577	FGD4	+	32546307	32690251	NM_139241
19	50328159	rs1114831	A	C	2	6.44e-05	1.406	PPP1R37	+	50288270	50342383	NM_019121
6	24667260	rs807541	G	A	3	6.47e-05	1.2374	KIAA0319	-	24652310	24754362	NM_001168374
15	90464205	rs7175812	C	T	2	6.49e-05	0.7466	SLCO3A1	+	90197941	90516669	NM_001145044
2	200857658	rs4672726	A	G	3	6.5e-05	1.22	Intergenic
14	20134857	rs7159639	G	C	2	6.53e-05	0.6649	Intergenic
3	64668140	rs9828674	G	T	3	6.55e-05	1.2286	ADAMTS9-AS2	+	64645585	64972183	NR_038264
4	125641913	rs7675285	A	G	2	6.56e-05	1.2689	Intergenic
10	33507114	rs10080	A	G	2	6.59e-05	1.2401	NRP1	-	33506424	33663839	NM_001244973
13	41080377	rs9566809	A	C	2	6.62e-05	0.5969	VWA8	-	41038960	41433221	NM_015058
11	59703828	rs583791	T	C	3	6.64e-05	1.1896	MS4A6A	-	59695655	59708715	NM_152852
19	50323656	rs17643262	A	G	2	6.7e-05	1.4049	PPP1R37	+	50288270	50342383	NM_019121
6	5864701	rs12213320	G	A	3	6.72e-05	0.815	Intergenic
10	34190827	rs41441548	A	G	2	6.74e-05	0.6501	Intergenic
16	83746763	rs17791545	C	G	2	6.76e-05	0.7648	Intergenic
12	32653759	rs999840	T	C	2	6.84e-05	1.265	FGD4	+	32546307	32690251	NM_139241
12	32684241	rs10771973	A	G	2	6.87e-05	1.2565	FGD4	+	32546307	32690251	NM_139241
8	47072705	rs4242436	G	A	2	7.02e-05	0.5204	Intergenic
3	10115671	rs7626117	A	G	2	7.17e-05	0.7598	FANCD2	+	10043112	10118614	NM_001018115
3	10115671	rs7626117	A	G	2	7.17e-05	0.7598	FANCD2OS	-	10098003	10124915	NM_173472
1	118870633	rs1830853	T	C	3	7.33e-05	0.8334	Intergenic
6	77337162	rs4441926	A	G	3	7.33e-05	1.1871	Intergenic
3	54765419	rs934083	C	T	3	7.37e-05	1.1849	CACNA2D3	+	54131732	55083624	NM_018398
5	117745419	rs11958566	G	C	2	7.39e-05	0.787	Intergenic
12	32674324	rs11052117	T	C	2	7.4e-05	1.2552	FGD4	+	32546307	32690251	NM_139241
12	32679398	rs10771969	T	A	2	7.4e-05	1.2552	FGD4	+	32546307	32690251	NM_139241
11	59622247	rs2847655	C	T	2	7.57e-05	0.8056	MS4A2	+	59612712	59622516	NM_000139
6	5845267	rs1590328	A	G	3	7.79e-05	0.8176	Intergenic
4	125645317	rs6534444	T	C	2	7.94e-05	1.2654	Intergenic
13	41072792	rs9566806	T	C	2	8.03e-05	0.6048	VWA8	-	41038960	41433221	NM_015058
4	20269504	rs10024417	T	C	2	8.11e-05	0.7516	Intergenic
3	55921337	rs6794124	A	C	3	8.24e-05	0.8391	ERC2	-	55517375	56477431	NM_015576
11	24478242	rs7943454	T	C	3	8.28e-05	1.1823	LUZP2	+	24475091	25060762	NM_001009909
11	77618033	rs2450129	C	T	3	8.29e-05	0.7938	GAB2	-	77603983	77806516	NM_080491
10	131861327	rs1570797	T	G	3	8.33e-05	1.3399	GLRX3	+	131824628	131868636	NM_001199868
11	67973996	rs676318	C	T	3	8.52e-05	1.3784	LRP5	+	67836683	67973319	NM_002335
3	55918631	rs13072547	T	C	3	8.57e-05	0.8397	ERC2	-	55517375	56477431	NM_015576
3	55933122	rs724334	T	C	3	8.57e-05	0.839	ERC2	-	55517375	56477431	NM_015576
10	63036964	rs2251363	C	A	2	8.61e-05	0.8079	Intergenic
9	10018397	rs1217007	T	C	2	8.81e-05	0.7857	PTPRD	-	8304245	10602723	NM_002839
15	90453177	rs207964	T	C	2	9e-05	0.7575	SLCO3A1	+	90197941	90516669	NM_001145044
4	143689583	rs13102150	A	C	2	9.03e-05	0.8094	INPP4B	-	143168631	143987054	NM_003866
10	109385346	rs7914264	C	T	3	9.07e-05	0.8442	Intergenic
13	41238198	rs9566846	T	C	3	9.08e-05	0.6605	VWA8	-	41038960	41433221	NM_015058
11	59693555	rs667897	A	G	3	9.12e-05	1.1836	MS4A6A	-	59695655	59708715	NM_152852
16	7891897	rs3922908	C	T	3	9.12e-05	1.2227	Intergenic
5	36488075	rs12516155	T	C	2	9.14e-05	1.2637	Intergenic
11	59833269	rs11824734	A	G	2	9.14e-05	0.8047	MS4A4A	+	59804589	59833021	NM_024021
5	36487822	rs10066222	C	T	2	9.19e-05	1.2612	Intergenic
5	117744488	rs6595122	C	A	2	9.19e-05	0.7841	Intergenic
1	10480797	rs647281	A	G	2	9.25e-05	0.6615	PEX14	+	10457589	10613405	NM_004565
15	64207290	rs8039023	T	G	3	9.29e-05	1.2088	MEGF11	-	63974687	64333129	NM_032445
18	13421322	rs12965816	T	C	2	9.56e-05	1.2515	LDLRAD4	+	13208728	13642753	NM_181482
18	13421322	rs12965816	T	C	2	9.56e-05	1.2515	LOC100288122	-	13409497	13417533	NR_040031
19	50342226	rs1048699	T	C	3	9.56e-05	1.3128	PPP1R37	+	50288270	50342383	NM_019121
19	50342226	rs1048699	T	C	3	9.56e-05	1.3128	NKPD1	-	50344847	50355248	NM_198478
6	134622811	rs1763505	T	C	2	9.57e-05	1.3068	SGK1	-	134532076	134680889	NM_001143676
8	3089792	rs10090255	C	G	2	9.57e-05	0.7942	CSMD1	-	2780281	4839736	NM_033225
13	41155921	rs17637547	C	T	2	9.61e-05	0.6111	VWA8	-	41038960	41433221	NM_015058
9	107833250	rs4255200	G	A	2	9.72e-05	0.7383	Intergenic
7	15834996	rs11768573	G	T	3	9.75e-05	0.7902	Intergenic
14	26641506	rs749901	T	C	3	9.78e-05	1.2945	Intergenic
6	24648694	rs807511	G	A	3	9.91e-05	1.2198	ALDH5A1	+	24603175	24645414	NM_170740
6	24648694	rs807511	G	A	3	9.91e-05	1.2198	KIAA0319	-	24652310	24754362	NM_001168374
7	17677660	rs4721643	C	T	3	9.93e-05	0.8397	Intergenic
6	16549683	rs1737844	A	G	2	0.0001011	0.7943	ATXN1	-	16407321	16869700	NM_000332
1	10434176	rs666103	T	C	2	0.0001014	0.6632	APITD1-CORT	+	10412745	10434647	NM_001270517
1	10434176	rs666103	T	C	2	0.0001014	0.6632	CORT	+	10432362	10434647	NM_001302
10	123785283	rs2459068	T	G	3	0.0001028	1.2305	TACC2	+	123738678	124004047	NM_206862
1	10438001	rs2483686	T	C	2	0.0001031	0.6635	APITD1-CORT	+	10412745	10434647	NM_001270517
1	10438001	rs2483686	T	C	2	0.0001031	0.6635	CORT	+	10432362	10434647	NM_001302
1	100049332	rs9887771	G	C	2	0.000104	0.7881	Intergenic
6	114631166	rs2037336	G	T	2	0.000104	1.2908	Intergenic
7	89813987	rs11563905	T	C	2	0.0001059	2.2786	GTPBP10	+	89813914	89858705	NM_033107
10	129106152	rs11017990	C	G	2	0.0001062	2.0021	DOCK1	+	128584012	129140770	NM_001380
7	67651100	rs11770239	A	G	3	0.0001066	1.2203	Intergenic
10	20372958	rs10508608	T	G	3	0.0001067	0.7216	PLXDC2	+	20145377	20609121	NM_032812
6	15117116	rs724626	A	G	3	0.0001092	1.3067	Intergenic
15	52923798	rs7497796	A	C	3	0.0001093	1.2249	Intergenic
6	159823571	rs6929061	A	G	2	0.0001102	0.7428	Intergenic
16	25852201	rs4303490	A	G	3	0.0001103	0.8431	HS3ST4	+	25610847	26056510	NM_006040
1	216017779	rs17726462	A	G	3	0.0001115	0.8475	SPATA17	+	215871317	216107107	NM_138796
20	11561200	rs17800370	A	G	2	0.0001131	0.7759	Intergenic
11	59612604	rs1441586	T	C	2	0.0001133	1.2362	MS4A2	+	59612712	59622516	NM_000139
2	200839404	rs4673837	A	G	3	0.000114	1.2323	Intergenic
7	134281182	rs3800752	A	G	3	0.0001148	1.1985	CALD1	+	134114703	134306020	NM_033157
1	117619460	rs7521942	T	C	2	0.0001154	1.4364	Intergenic
17	32525480	rs1266182	A	T	2	0.0001156	0.7992	ACACA	-	32516039	32841015	NM_198839
8	43781913	rs8175501	G	C	2	0.000116	0.4885	Intergenic
8	98430222	rs1316792	C	T	2	0.0001181	1.3394	Intergenic
8	47113602	rs6558207	T	C	2	0.00012	0.5365	Intergenic
1	213915210	rs2797234	C	T	2	0.0001203	1.308	USH2A	-	213862858	214663361	NM_206933
5	73069879	rs17664701	T	A	2	0.0001205	1.2647	ARHGEF28	+	72957738	73273574	NM_001080479
10	123772403	rs11596204	T	C	3	0.0001212	1.2587	TACC2	+	123738678	124004047	NM_206862
5	106869682	rs152562	T	C	2	0.0001237	0.815	EFNA5	-	106740488	107034495	NM_001962
4	80437086	rs17494639	C	T	2	0.000124	1.3932	LOC100505875	+	80111925	80448977	NR_038342
12	32663179	rs10844259	A	G	2	0.0001249	1.2414	FGD4	+	32546307	32690251	NM_139241
7	89557423	rs11978340	T	C	3	0.0001255	1.2339	Intergenic
6	15107431	rs1259061	A	G	3	0.0001265	1.3019	Intergenic
11	59638100	rs574695	G	C	2	0.0001265	1.2277	Intergenic
16	83739376	rs3104834	T	C	2	0.0001274	1.3293	LOC400548	+	83728256	83740550	NR_033984
16	77910920	rs6564659	C	T	3	0.0001288	0.8269	Intergenic
13	101772616	rs17505622	A	G	2	0.0001293	0.6194	FGF14	-	101171205	101852125	NM_175929
13	101772616	rs17505622	A	G	2	0.0001293	0.6194	FGF14-IT1	-	101742670	101844870	NR_036486
15	74182612	rs2959836	A	G	3	0.0001309	1.2045	C15orf27	+	74139353	74284359	NM_152335
12	97097733	rs10860303	T	C	2	0.0001325	0.7956	Intergenic
15	90459045	rs207952	G	A	2	0.0001362	0.7829	SLCO3A1	+	90197941	90516669	NM_001145044
5	51954893	rs1450949	G	A	2	0.0001372	0.7766	Intergenic
11	59634543	rs4939311	C	T	2	0.0001372	1.2283	Intergenic
11	59722871	rs2123314	T	C	2	0.0001374	1.233	Intergenic
10	99016102	rs10786321	T	C	2	0.0001383	1.227	ARHGAP19-SLIT1	-	98902788	99042420	NR_037909
10	99016102	rs10786321	T	C	2	0.0001383	1.227	ARHGAP19	-	98971919	99042420	NM_032900
3	153555745	rs3920075	C	T	3	0.0001384	0.8365	MBNL1	+	153468518	153666258	NM_021038
1	117630818	rs1289817	C	A	2	0.0001389	1.4211	Intergenic
18	26856766	rs1313595	A	C	3	0.0001389	0.8162	DSC3	-	26824049	26876779	NM_024423
10	70080636	rs7913568	C	T	2	0.0001396	1.3182	TET1	+	69990122	70124245	NM_030625
19	50062678	rs12610605	A	G	2	0.0001401	0.7641	PVRL2	+	50041232	50084325	NM_001042724
4	183775949	rs17324527	A	T	2	0.0001415	0.7811	TENM3	+	183482130	183961171	NM_001080477
12	32669306	rs7970584	G	A	2	0.0001423	1.2379	FGD4	+	32546307	32690251	NM_139241
11	59722301	rs11230183	C	T	2	0.0001431	1.2323	Intergenic
10	2444195	rs11251231	A	G	3	0.0001432	1.1827	Intergenic
6	154914646	rs12205238	T	C	2	0.0001434	1.3142	Intergenic
8	61967878	rs12546463	T	C	2	0.0001434	1.2508	Intergenic
1	64942993	rs11208512	C	T	2	0.000144	1.3195	Intergenic
11	59676807	rs11230161	C	A	2	0.0001441	0.8125	Intergenic
10	99021675	rs10736115	T	C	2	0.000146	1.2261	ARHGAP19-SLIT1	-	98902788	99042420	NR_037909
10	99021675	rs10736115	T	C	2	0.000146	1.2261	ARHGAP19	-	98971919	99042420	NM_032900
3	53580885	rs10490772	T	C	3	0.0001463	1.2483	CACNA1D	+	53504115	53821532	NM_000720
1	44135730	rs16831389	T	C	2	0.0001471	1.8099	ST3GAL3	+	43945790	44169424	NM_174963
10	34171169	rs12413603	T	C	2	0.0001473	0.7317	Intergenic
11	59718062	rs11230180	G	T	2	0.000149	1.2317	Intergenic
12	32671763	rs10844260	C	T	2	0.0001496	1.237	FGD4	+	32546307	32690251	NM_139241
15	90459015	rs185950	G	T	2	0.0001508	0.7841	SLCO3A1	+	90197941	90516669	NM_001145044
3	153560315	rs2055355	G	A	3	0.0001521	0.8374	MBNL1	+	153468518	153666258	NM_021038
12	2444306	rs16929447	T	C	2	0.0001529	1.307	CACNA1C	+	2032676	2677376	NM_199460
15	73751281	rs8031394	C	T	2	0.0001536	0.7414	CSPG4	-	73753717	73792244	NM_001897
10	20409004	rs4336923	G	A	2	0.0001543	0.8049	PLXDC2	+	20145377	20609121	NM_032812
8	41379416	rs973441	C	T	3	0.0001544	0.8408	Intergenic
6	159832844	rs240865	A	G	2	0.0001562	0.7477	Intergenic
2	79397764	rs10200167	C	T	3	0.0001563	1.4094	Intergenic
6	5873288	rs12193231	G	A	3	0.0001568	0.8154	Intergenic
3	64667786	rs12488554	C	T	3	0.0001588	1.222	ADAMTS9-AS2	+	64645585	64972183	NR_038264
4	109559855	rs6811130	C	T	3	0.0001591	1.2497	Intergenic
4	183776685	rs17258738	C	T	2	0.0001599	0.7805	TENM3	+	183482130	183961171	NM_001080477
8	98430864	rs2679768	G	T	3	0.0001599	1.2649	Intergenic
15	98907096	rs12915921	T	C	2	0.0001613	0.7686	CERS3	-	98758122	98902448	NM_178842
15	98907096	rs12915921	T	C	2	0.0001613	0.7686	PRKXP1	-	98905479	98917011	NR_073405
19	50169221	rs16979595	A	G	3	0.0001614	1.2384	CLPTM1	+	50149681	50188444	NR_040007
7	79559566	rs4731202	G	T	2	0.0001622	0.8092	Intergenic
16	80603391	rs41526051	C	G	2	0.0001636	1.2458	SDR42E1	-	80588751	80602594	NM_145168
13	41094943	rs7981912	A	G	2	0.0001648	0.6734	VWA8	-	41038960	41433221	NM_015058
6	155812124	rs2235673	C	T	3	0.0001657	0.7902	NOX3	-	155758193	155818729	NM_015718
12	93849950	rs7974531	G	A	2	0.0001663	1.2385	Intergenic
7	50234106	rs13223971	G	A	2	0.0001669	2.1648	Intergenic
9	132011641	rs868964	A	G	2	0.0001673	0.69	NCS1	+	131974677	132039404	NM_014286
8	98427422	rs7832008	G	A	2	0.0001676	1.3341	Intergenic
20	40134040	rs6016677	A	G	3	0.0001688	0.8478	PTPRT	-	40134805	41251971	NM_133170
1	202816119	rs10793766	C	T	2	0.0001699	1.2421	Intergenic
14	100609137	rs7147503	T	C	2	0.0001712	1.2596	MEG9	+	100606000	100609026	NR_047664
11	59641696	rs1303615	C	T	2	0.0001713	1.2228	Intergenic
3	106378772	rs6776849	A	C	2	0.0001723	0.7768	Intergenic
8	53337835	rs16917588	C	T	2	0.0001734	0.3233	ST18	-	53185944	53484992	NM_014682
10	99116239	rs2275581	A	G	3	0.0001737	0.8318	RRP12	-	99106447	99151117	NM_015179
15	73737218	rs11638663	A	G	2	0.0001742	0.7068	SNX33	+	73728402	73738023	NM_153271
5	101401485	rs1381972	T	A	2	0.0001754	1.2185	Intergenic
6	159834704	rs365557	T	C	2	0.0001772	0.7504	Intergenic
17	12713309	rs7218950	G	A	2	0.0001772	0.6526	ARHGAP44	+	12633553	12835685	NM_014859
1	10434643	rs1307497	T	C	3	0.0001778	0.7221	APITD1-CORT	+	10412745	10434647	NM_001270517
1	10434643	rs1307497	T	C	3	0.0001778	0.7221	CORT	+	10432362	10434647	NM_001302
17	32568624	rs12450937	T	C	2	0.0001811	0.8149	ACACA	-	32516039	32841015	NM_198839
2	5541018	rs4669393	T	C	3	0.0001824	0.7402	Intergenic
22	38692892	rs138006	A	G	2	0.0001828	0.7765	GRAP2	+	38627031	38697330	NM_004810
6	88450424	rs2250795	C	T	3	0.0001832	1.2223	AKIRIN2	-	88441296	88468704	NM_018064
8	5870537	rs17075807	C	T	2	0.0001833	1.2795	Intergenic
1	243272499	rs11580510	C	T	3	0.0001843	1.1764	EFCAB2	+	243199793	243317771	NM_032328
19	53235408	rs10405324	G	C	2	0.0001843	1.4508	CABP5	-	53224451	53239123	NM_019855
11	59656682	rs4939312	C	T	2	0.0001845	1.2267	Intergenic
3	78735521	rs12496962	T	C	2	0.0001853	0.8165	ROBO1	-	78729077	79899749	NM_002941
7	50260203	rs6963387	C	A	2	0.0001868	2.0975	Intergenic
13	41078806	rs9566808	C	T	3	0.0001888	0.6777	VWA8	-	41038960	41433221	NM_015058
6	729680	rs17239807	T	C	2	0.00019	0.7201	Intergenic
19	49897717	rs8108277	C	T	2	0.00019	0.8008	CEACAM16	+	49894260	49905826	NM_001039213
7	112838024	rs1404228	A	G	3	0.000191	0.7157	Intergenic
6	5855304	rs1001289	T	C	2	0.0001919	0.7914	Intergenic
1	21761927	rs1767429	G	A	2	0.0001925	1.2254	ALPL	+	21708444	21777492	NM_000478
14	61309325	rs6573400	G	A	3	0.0001926	0.8369	SNAPC1	+	61298827	61332899	NM_003082
11	59647250	rs1303621	T	C	2	0.0001927	1.2208	Intergenic
6	5848993	rs7744130	A	G	2	0.000193	0.7914	Intergenic
11	59608689	rs558678	G	T	2	0.0001966	0.8025	MS4A2	+	59612712	59622516	NM_000139
1	202724409	rs10494852	C	T	2	0.0001976	1.2407	PIK3C2B	-	202658380	202726097	NM_002646
2	73979058	rs7557701	A	G	3	0.0001987	0.8092	ACTG2	+	73973600	74000288	NM_001615
11	59583253	rs1286289	A	T	2	0.000199	0.8069	MS4A3	+	59580676	59595164	NM_006138
4	139451721	rs17050281	A	G	2	0.0002007	0.7281	LINC00499	+	139450314	139564948	NR_051987
22	19757577	rs403653	A	G	2	0.0002008	0.7644	Intergenic
5	106832731	rs25998	T	C	2	0.000201	1.2374	EFNA5	-	106740488	107034495	NM_001962
15	93297736	rs12050609	G	T	2	0.0002011	0.8032	Intergenic
4	169685203	rs9312333	C	T	3	0.0002017	0.8408	PALLD	+	169654791	170086183	NM_001166108
1	202781922	rs2369244	G	C	2	0.0002018	1.2344	MDM4	+	202752129	202793871	NM_002393
11	59608654	rs558788	G	T	2	0.0002025	0.8029	MS4A2	+	59612712	59622516	NM_000139
4	186269930	rs11943238	T	G	3	0.0002038	0.7908	Intergenic
12	132041200	rs11147178	T	G	2	0.0002044	0.8145	ZNF605	-	132008091	132042965	NM_001164715
1	118878444	rs942584	C	A	3	0.0002051	0.8445	Intergenic
11	85546288	rs3851179	T	C	3	0.0002052	0.8482	Intergenic
1	202728673	rs11240751	A	G	2	0.0002053	1.24	PIK3C2B	-	202658380	202726097	NM_002646
4	125634984	rs6534441	C	T	2	0.0002065	1.2347	Intergenic
10	63057368	rs2034855	C	A	2	0.0002067	0.8132	Intergenic
5	67986587	rs33353	T	C	2	0.0002082	2.0196	Intergenic
10	64618690	rs10733789	C	T	3	0.0002087	0.8407	JMJD1C	-	64596993	64895728	NM_032776
19	50044259	rs7255063	C	G	2	0.0002097	0.7991	PVRL2	+	50041232	50084325	NM_001042724
5	38940120	rs1239334	C	T	3	0.00021	1.1893	Intergenic
10	64931190	rs2893923	T	C	3	0.0002102	0.8415	Intergenic
14	26628635	rs2181461	C	T	3	0.0002102	1.2791	Intergenic
15	66862528	rs2290428	A	G	2	0.0002104	0.6615	ANP32A	-	66857928	66900315	NM_006305
14	61309786	rs2255627	G	A	3	0.0002105	0.8378	SNAPC1	+	61298827	61332899	NM_003082
2	73512081	rs2421549	T	C	3	0.0002121	0.6968	ALMS1	+	73466393	73690554	NM_015120
6	156516974	rs12201446	T	C	2	0.0002121	0.7878	Intergenic
10	14435834	rs7918657	T	C	2	0.0002122	1.3851	Intergenic
1	155150989	rs749256	T	C	2	0.0002124	1.3585	PEAR1	+	155130146	155152850	NM_001080471
8	5553852	rs2408088	T	C	2	0.000213	0.7695	Intergenic
18	34202297	rs1196943	C	G	2	0.0002132	0.8103	Intergenic
5	30184612	rs13154270	G	A	2	0.0002144	0.7492	Intergenic
11	77621105	rs2450130	G	T	2	0.0002145	0.7656	GAB2	-	77603983	77806516	NM_080491
20	56588886	rs11699206	C	G	2	0.0002149	1.4972	APCDD1L-AS1	+	56523840	56628355	NR_034147
4	20285633	rs28414076	G	A	2	0.000215	0.766	Intergenic
3	106415848	rs10933810	T	C	2	0.0002167	0.7891	Intergenic
16	7875119	rs8053478	T	C	2	0.0002177	0.6446	Intergenic
12	107585235	rs750134	T	G	2	0.0002181	1.4616	CORO1C	-	107563015	107649455	NM_014325
6	40340449	rs1325546	T	C	2	0.0002188	1.3165	Intergenic
1	10421823	rs544289	G	A	3	0.0002189	0.7411	APITD1-CORT	+	10412745	10434647	NM_001270517
1	10421823	rs544289	G	A	3	0.0002189	0.7411	APITD1	+	10412745	10425459	NM_199294
10	109871972	rs12217601	A	G	3	0.000219	0.8092	Intergenic
1	202789112	rs10900597	C	T	2	0.0002197	1.2329	MDM4	+	202752129	202793871	NM_002393
12	107588087	rs1362614	G	A	2	0.0002208	1.4501	CORO1C	-	107563015	107649455	NM_014325
10	20394413	rs10827949	A	G	2	0.0002217	0.8049	PLXDC2	+	20145377	20609121	NM_032812
4	139451679	rs17050280	A	G	2	0.0002222	0.7278	LINC00499	+	139450314	139564948	NR_051987
10	61407293	rs10821624	C	T	3	0.0002231	0.8522	Intergenic
16	7907111	rs11646592	T	C	3	0.0002233	1.2054	Intergenic
11	59659863	rs525794	A	G	2	0.0002237	1.2216	Intergenic
1	202783200	rs1563828	A	G	2	0.0002252	1.2338	MDM4	+	202752129	202793871	NM_002393
7	45421877	rs13233674	C	T	3	0.0002261	0.7077	Intergenic
12	107604159	rs17040860	T	C	2	0.0002262	1.4458	CORO1C	-	107563015	107649455	NM_014325
3	56013039	rs1379717	A	G	3	0.0002267	0.8441	ERC2	-	55517375	56477431	NM_015576
4	7229179	rs4689078	G	A	2	0.0002272	0.8061	Intergenic
4	20284946	rs11727810	C	T	2	0.0002286	0.7668	Intergenic
1	44163875	rs12569336	A	T	2	0.0002308	1.7735	ST3GAL3	+	43945790	44169424	NM_174963
6	40340305	rs1325545	T	C	3	0.000231	1.1938	Intergenic
1	202809203	rs12039454	T	C	2	0.0002337	1.2318	Intergenic
19	49756275	rs1727757	A	G	3	0.0002346	0.7841	CEACAM22P	-	49732884	49751990	NR_027754
6	50943774	rs9473926	A	G	2	0.0002352	0.8226	Intergenic
11	40576404	rs1027388	G	T	3	0.0002358	0.8532	LRRC4C	-	40092325	41437762	NM_001258419
14	33110333	rs7143076	G	A	3	0.0002366	1.3408	NPAS3	+	32478209	33343133	NM_001164749
4	120978829	rs6856110	C	G	2	0.0002372	0.824	Intergenic
10	109683782	rs10884573	T	C	3	0.0002375	0.8157	Intergenic
11	77615448	rs2248407	A	G	2	0.000238	0.7671	GAB2	-	77603983	77806516	NM_080491
11	77617811	rs2512549	T	C	2	0.000238	0.7671	GAB2	-	77603983	77806516	NM_080491
5	30180969	rs4529208	C	T	2	0.0002397	0.7498	Intergenic
12	68062566	rs2603088	G	A	2	0.0002411	1.2961	YEATS4	+	68039798	68070843	NM_006530
8	68872245	rs4620272	T	C	2	0.0002417	1.2995	Intergenic
9	131998126	rs1342043	C	T	2	0.0002419	0.7271	NCS1	+	131974677	132039404	NM_014286
11	77613814	rs1385600	G	A	2	0.0002438	0.7674	GAB2	-	77603983	77806516	NM_080491
12	107642118	rs12423733	T	C	2	0.0002438	1.4498	CORO1C	-	107563015	107649455	NM_014325
22	38693724	rs2284078	G	A	2	0.0002444	0.7787	GRAP2	+	38627031	38697330	NM_004810
15	90446375	rs4984338	G	A	2	0.0002455	0.7755	SLCO3A1	+	90197941	90516669	NM_001145044
16	8398216	rs12325385	A	C	2	0.0002467	0.7303	Intergenic
16	55160299	rs11643815	A	G	2	0.0002469	0.7175	MT4	+	55156461	55160370	NM_032935
17	32542163	rs1266175	G	A	2	0.0002469	0.811	ACACA	-	32516039	32841015	NM_198839
16	83746718	rs9935396	A	G	3	0.0002474	1.197	Intergenic
16	25807158	rs3934987	G	A	3	0.0002475	0.8308	HS3ST4	+	25610847	26056510	NM_006040
19	49750044	rs1727753	G	A	3	0.0002481	0.7863	CEACAM22P	-	49732884	49751990	NR_027754
19	50041803	rs2306149	A	C	2	0.0002488	0.7996	PVRL2	+	50041232	50084325	NM_001042724
11	85435237	rs677909	C	T	3	0.0002489	0.846	PICALM	-	85345861	85458571	NM_001206947
15	98910487	rs12442986	T	A	2	0.0002494	0.7751	PRKXP1	-	98905479	98917011	NR_073405
6	51034113	rs6924593	C	T	3	0.0002497	0.8537	Intergenic
11	77613712	rs1385601	C	A	2	0.0002498	0.7677	GAB2	-	77603983	77806516	NM_080491
15	93301166	rs8029903	T	C	2	0.0002499	0.8067	Intergenic
13	103062844	rs9586225	G	A	2	0.0002505	0.633	Intergenic
12	93855316	rs10128881	C	T	2	0.0002515	1.2324	Intergenic
1	236082146	rs2819751	A	C	3	0.0002517	0.8373	Intergenic
3	54638045	rs496625	A	G	3	0.0002523	1.1686	CACNA2D3	+	54131732	55083624	NM_018398
3	54638045	rs496625	A	G	3	0.0002523	1.1686	ESRG	-	54641190	54648924	NR_027122
11	85465472	rs536841	C	T	3	0.0002524	0.8452	Intergenic
5	169805573	rs6877607	G	A	3	0.0002527	1.1706	KCNIP1	+	169713458	170096214	NM_001034838
1	44168783	rs12561948	G	A	2	0.0002538	1.7649	ST3GAL3	+	43945790	44169424	NM_174963
1	44168783	rs12561948	G	A	2	0.0002538	1.7649	ARTN	+	44171578	44175499	NM_057090
7	18805708	rs10261308	C	A	2	0.0002544	0.6182	Intergenic
9	113668983	rs12379047	A	G	2	0.0002549	0.7886	Intergenic
2	104866478	rs7579394	T	G	2	0.000255	1.2201	Intergenic
7	88016552	rs2519526	A	C	2	0.000255	1.2296	Intergenic
17	32521381	rs1266180	C	T	2	0.000255	0.8056	ACACA	-	32516039	32841015	NM_198839
12	91384673	rs2277364	T	C	2	0.0002554	0.6918	Intergenic
18	50934136	rs4801135	T	C	3	0.0002555	0.8493	Intergenic
5	106832906	rs25999	T	A	2	0.0002559	1.2297	EFNA5	-	106740488	107034495	NM_001962
6	15030554	rs367602	T	G	3	0.0002561	0.8121	Intergenic
11	77604417	rs1046780	G	A	2	0.0002562	0.7621	USP35	+	77577505	77603405	NM_020798
11	77604417	rs1046780	G	A	2	0.0002562	0.7621	GAB2	-	77603983	77806516	NM_080491
11	77604749	rs2511162	G	A	2	0.0002562	0.7621	USP35	+	77577505	77603405	NM_020798
11	77604749	rs2511162	G	A	2	0.0002562	0.7621	GAB2	-	77603983	77806516	NM_080491
22	27475411	rs714191	C	T	3	0.0002565	0.8218	HSCB	+	27468042	27483496	NM_172002
2	185899057	rs13023579	A	G	2	0.0002584	1.2464	Intergenic
15	93301656	rs11637613	G	T	2	0.0002594	0.8071	Intergenic
1	118501156	rs6700302	C	G	2	0.0002606	1.2441	SPAG17	-	118297810	118529371	NM_206996
6	50943566	rs9463654	T	C	2	0.000261	0.825	Intergenic
16	5881965	rs2005820	A	C	2	0.0002614	0.7886	Intergenic
10	14440365	rs12265618	T	G	2	0.0002615	1.3802	Intergenic
4	169676943	rs7661751	A	G	2	0.0002624	0.8102	PALLD	+	169654791	170086183	NM_001166108
19	19725309	rs247785	T	G	3	0.000263	1.5568	LINC00663	-	19728180	19748222	NR_026956
11	11289083	rs10741542	T	C	2	0.0002633	1.2255	GALNT18	-	11248996	11600137	NM_198516
6	124223246	rs2171970	G	A	3	0.0002652	0.816	NKAIN2	+	124166767	125188485	NM_001040214
7	88017355	rs2519525	T	C	2	0.0002652	1.2289	Intergenic
13	26426322	rs12863583	C	T	3	0.0002677	1.1787	Intergenic
6	16866324	rs647750	C	G	2	0.0002685	0.7943	ATXN1	-	16407321	16869700	NM_000332
9	119515423	rs4986791	T	C	2	0.0002694	1.5342	TLR4	+	119506273	119519590	NM_003266
10	99061398	rs10786327	C	T	3	0.0002694	1.17	Intergenic
11	85465999	rs541458	C	T	3	0.0002694	0.8464	Intergenic
11	59625695	rs580064	T	C	2	0.0002695	1.2184	MS4A2	+	59612712	59622516	NM_000139
21	42877322	rs417252	T	C	2	0.0002704	0.8233	SLC37A1	+	42792810	42874619	NM_018964
11	59671302	rs583296	T	C	2	0.0002707	1.2215	Intergenic
6	51029230	rs9369988	T	G	2	0.0002723	0.8246	Intergenic
16	55161831	rs4784684	A	G	2	0.0002738	0.7171	MT4	+	55156461	55160370	NM_032935
20	34293282	rs6058435	G	A	3	0.0002741	0.821	AAR2	+	34287752	34308277	NM_015511
6	5841460	rs12195664	A	G	2	0.0002743	0.7898	Intergenic
1	99935859	rs6679943	C	T	3	0.0002744	1.1736	PALMD	+	99884018	99932685	NM_017734
5	123894986	rs10046065	T	G	3	0.000275	1.203	Intergenic
7	98042048	rs817750	A	G	2	0.0002757	1.2448	Intergenic
10	99049635	rs10882891	C	A	3	0.000276	1.1694	Intergenic
18	52434936	rs10513897	T	C	2	0.0002765	1.5184	TXNL1	-	52421050	52456918	NR_024546
1	9525549	rs12023288	A	C	2	0.0002771	0.7752	SLC25A33	+	9522114	9565418	NM_032315
3	106411138	rs9846852	A	G	2	0.0002772	0.8084	Intergenic
2	174913759	rs7582977	C	T	2	0.000278	1.4291	SP9	+	174908066	174910514	NM_001145250
7	86256350	rs2299221	T	A	2	0.000278	1.7555	GRM3	+	86111165	86332128	NM_000840
13	103078700	rs9554982	G	A	2	0.0002783	0.5743	Intergenic
16	83747967	rs2966852	T	C	3	0.000279	1.1945	Intergenic
2	221495104	rs749635	C	A	2	0.0002793	1.2728	Intergenic
12	107597467	rs10507231	T	C	2	0.0002804	1.4412	CORO1C	-	107563015	107649455	NM_014325
12	107617842	rs17040895	T	C	2	0.0002804	1.4412	CORO1C	-	107563015	107649455	NM_014325
6	51033290	rs9473953	T	A	2	0.0002809	0.825	Intergenic
11	77602518	rs2450138	T	C	2	0.0002809	0.7627	USP35	+	77577505	77603405	NM_020798
11	77602518	rs2450138	T	C	2	0.0002809	0.7627	GAB2	-	77603983	77806516	NM_080491
11	77603940	rs2912	A	G	2	0.0002809	0.7627	USP35	+	77577505	77603405	NM_020798
11	77603940	rs2912	A	G	2	0.0002809	0.7627	GAB2	-	77603983	77806516	NM_080491
11	77603957	rs866901	T	C	2	0.0002809	0.7627	USP35	+	77577505	77603405	NM_020798
11	77603957	rs866901	T	C	2	0.0002809	0.7627	GAB2	-	77603983	77806516	NM_080491
7	45337035	rs12702136	G	A	3	0.0002826	0.6724	Intergenic
11	77607993	rs2450122	C	T	2	0.0002827	0.7671	USP35	+	77577505	77603405	NM_020798
11	77607993	rs2450122	C	T	2	0.0002827	0.7671	GAB2	-	77603983	77806516	NM_080491
4	169678354	rs6552873	C	T	2	0.000283	0.8111	PALLD	+	169654791	170086183	NM_001166108
4	169678372	rs6552874	A	T	2	0.000283	0.8111	PALLD	+	169654791	170086183	NM_001166108
5	165176757	rs1833580	G	T	2	0.0002841	1.2732	Intergenic
1	202827300	rs6679717	A	G	2	0.000285	1.2282	Intergenic
13	23635951	rs9511097	T	C	3	0.000285	1.1687	SPATA13	+	23632860	23779212	NM_001166271
13	23635951	rs9511097	T	C	3	0.000285	1.1687	MIR2276	+	23634554	23634643	NR_031753
11	59699391	rs7935829	A	G	2	0.0002854	1.2187	MS4A6A	-	59695655	59708715	NM_152852
15	74182486	rs2221075	A	G	3	0.0002857	0.8569	C15orf27	+	74139353	74284359	NM_152335
10	36289489	rs708414	A	G	3	0.0002858	0.8101	Intergenic
14	61298052	rs7145164	G	A	3	0.0002866	0.7986	SNAPC1	+	61298827	61332899	NM_003082
11	59616754	rs502581	G	T	2	0.0002867	1.2174	MS4A2	+	59612712	59622516	NM_000139
3	14792731	rs3899614	A	G	2	0.0002869	1.2204	C3orf20	+	14691609	14789547	NM_001184958
11	77608147	rs901104	A	G	2	0.0002871	0.7689	USP35	+	77577505	77603405	NM_020798
11	77608147	rs901104	A	G	2	0.0002871	0.7689	GAB2	-	77603983	77806516	NM_080491
2	221502570	rs666274	G	A	2	0.0002874	1.273	Intergenic
2	73847582	rs2567599	G	A	3	0.0002886	0.7099	DUSP11	-	73842832	73860792	NM_003584
10	98971904	rs953097	T	C	3	0.000291	1.1674	ARHGAP19-SLIT1	-	98902788	99042420	NR_037909
10	98971904	rs953097	T	C	3	0.000291	1.1674	ARHGAP19	-	98971919	99042420	NM_032900
8	67075841	rs17397530	C	T	2	0.0002927	0.7613	Intergenic
6	95023735	rs1028795	C	T	3	0.0002928	0.8528	Intergenic
11	77605684	rs3740677	G	T	2	0.0002935	0.7689	USP35	+	77577505	77603405	NM_020798
11	77605684	rs3740677	G	T	2	0.0002935	0.7689	GAB2	-	77603983	77806516	NM_080491
12	64940704	rs11176107	T	C	2	0.0002936	1.4301	Intergenic
11	77607786	rs1485483	C	T	2	0.0002943	0.7665	USP35	+	77577505	77603405	NM_020798
11	77607786	rs1485483	C	T	2	0.0002943	0.7665	GAB2	-	77603983	77806516	NM_080491
10	20405001	rs10827955	T	G	2	0.000295	0.8104	PLXDC2	+	20145377	20609121	NM_032812
6	5842767	rs11243038	C	T	2	0.0002953	0.7957	Intergenic
11	59589699	rs501697	A	T	2	0.0002958	0.8075	MS4A3	+	59580676	59595164	NM_006138
1	202828240	rs7532236	C	T	2	0.000296	1.2276	Intergenic
4	85558914	rs7663470	C	T	3	0.000296	1.2073	Intergenic
10	33508020	rs2506141	C	T	2	0.0002963	1.2106	NRP1	-	33506424	33663839	NM_001244973
8	22441022	rs17671456	G	C	2	0.0002972	0.686	PPP3CC	+	22354427	22454602	NM_001243974
5	123200965	rs166238	C	T	3	0.0002976	0.7642	Intergenic
13	25932050	rs475300	T	G	2	0.0002982	0.4725	Intergenic
3	9947493	rs279545	G	A	3	0.0002984	0.8278	IL17RC	+	9933757	9950305	NM_153460
3	9947493	rs279545	G	A	3	0.0002984	0.8278	CRELD1	+	9950523	9962097	NM_015513
16	5884584	rs9926429	G	A	2	0.0003003	0.7989	Intergenic
15	98919576	rs883468	C	T	2	0.0003006	0.7777	PRKXP1	-	98905479	98917011	NR_073405
6	50982781	rs9381913	C	T	3	0.0003015	0.856	Intergenic
2	29340206	rs17007760	A	G	2	0.0003019	0.6139	ALK	-	29269143	29997981	NM_004304
6	5843357	rs12199406	A	G	2	0.0003038	0.7961	Intergenic
7	15824875	rs1942655	T	C	3	0.0003039	0.8039	Intergenic
11	77594953	rs2256464	A	C	2	0.0003045	0.7617	USP35	+	77577505	77603405	NM_020798
11	77598211	rs2510045	T	G	2	0.0003045	0.7617	USP35	+	77577505	77603405	NM_020798
11	77618724	rs1007837	C	T	2	0.0003045	0.7689	GAB2	-	77603983	77806516	NM_080491
6	50873311	rs2206272	A	G	3	0.0003072	0.8568	Intergenic
18	26875276	rs276926	A	G	3	0.0003076	0.8245	DSC3	-	26824049	26876779	NM_024423
4	169675855	rs11939452	C	T	2	0.0003085	0.8113	PALLD	+	169654791	170086183	NM_001166108
14	68822356	rs4902710	T	C	3	0.0003085	0.8581	GALNT16	+	68796433	68890943	NM_020692
1	21757782	rs3767155	T	C	2	0.0003092	1.2192	ALPL	+	21708444	21777492	NM_000478
21	42877061	rs449888	A	G	2	0.0003096	0.8248	SLC37A1	+	42792810	42874619	NM_018964
14	68837769	rs8008878	A	C	3	0.0003109	1.1944	GALNT16	+	68796433	68890943	NM_020692
14	68803738	rs2331957	C	T	3	0.0003135	1.1703	GALNT16	+	68796433	68890943	NM_020692
1	183800408	rs556035	C	T	3	0.000314	0.8558	Intergenic
10	109369986	rs7894460	G	A	2	0.0003146	0.8225	Intergenic
10	109370514	rs10884483	G	C	2	0.0003146	0.8225	Intergenic
12	97091269	rs11109371	C	T	2	0.0003169	0.8104	Intergenic
6	36598711	rs12203115	G	A	3	0.0003172	1.2111	STK38	-	36569646	36623225	NM_007271
1	9559814	rs9430153	G	A	2	0.0003181	0.7775	SLC25A33	+	9522114	9565418	NM_032315
1	9567959	rs9430332	C	T	2	0.0003181	0.7775	SLC25A33	+	9522114	9565418	NM_032315
1	9567959	rs9430332	C	T	2	0.0003181	0.7775	TMEM201	+	9571518	9597522	NM_001130924
5	166165634	rs1432929	C	T	3	0.0003185	0.7802	Intergenic
6	725441	rs13219492	G	A	3	0.0003185	0.7962	Intergenic
13	38685335	rs17590107	A	G	2	0.0003188	0.6735	Intergenic
5	26604000	rs6452345	T	C	2	0.0003206	0.7863	Intergenic
14	91988546	rs7143416	G	A	3	0.0003216	0.8503	SLC24A4	+	91858677	92037578	NM_153648
3	137092151	rs6776731	A	G	2	0.000322	0.6553	Intergenic
17	68581086	rs12449970	T	C	2	0.0003268	0.7522	SLC39A11	-	68153679	68600448	NM_139177
1	21774145	rs3767142	A	G	2	0.0003272	1.2338	ALPL	+	21708444	21777492	NM_000478
10	99070575	rs3781373	C	T	2	0.0003274	1.2182	FRAT1	+	99069011	99071662	NM_005479
5	106876894	rs152556	A	T	2	0.0003277	1.2268	EFNA5	-	106740488	107034495	NM_001962
1	9569724	rs9430174	G	A	2	0.0003282	0.7779	SLC25A33	+	9522114	9565418	NM_032315
1	9569724	rs9430174	G	A	2	0.0003282	0.7779	TMEM201	+	9571518	9597522	NM_001130924
10	76912067	rs9416061	A	G	3	0.0003282	0.7507	Intergenic
20	11521668	rs2224182	C	G	2	0.0003284	0.8105	Intergenic
1	9554983	rs9430152	G	T	2	0.0003286	0.7792	SLC25A33	+	9522114	9565418	NM_032315
4	125587831	rs10005560	G	C	2	0.0003292	1.3051	Intergenic
6	165109831	rs11752397	A	G	3	0.0003292	0.8573	Intergenic
10	12837764	rs4132050	A	G	3	0.0003296	1.1765	CAMK1D	+	12431588	12911739	NM_153498
1	100130691	rs3753494	T	C	3	0.00033	0.8076	AGL	+	100088227	100162167	NM_000642
13	103110599	rs7337511	T	C	3	0.0003305	0.6022	Intergenic
4	85587904	rs752402	G	A	3	0.0003308	1.1915	Intergenic
19	50040093	rs10426423	T	C	2	0.0003328	0.8066	PVRL2	+	50041232	50084325	NM_001042724
8	98429971	rs2247105	G	A	3	0.0003334	1.2491	Intergenic
22	47010348	rs133545	A	C	3	0.0003365	0.7963	Intergenic
12	107725455	rs1549087	C	T	2	0.0003368	1.47	SSH1	-	107700594	107775488	NM_018984
5	73077988	rs11749197	A	G	2	0.000338	1.2296	ARHGEF28	+	72957738	73273574	NM_001080479
6	40333847	rs1077330	G	A	3	0.0003386	1.1861	Intergenic
4	43608222	rs12644632	G	A	3	0.0003389	1.1723	Intergenic
16	8394414	rs7188412	G	C	2	0.0003389	0.6842	Intergenic
1	183803232	rs2842580	A	C	3	0.000339	0.8566	Intergenic
4	85596064	rs1444957	C	T	3	0.0003396	1.1932	Intergenic
3	106400316	rs1007679	A	G	2	0.0003428	0.811	Intergenic
6	69672336	rs10485435	T	G	3	0.0003435	1.1778	BAI3	+	69402352	70156124	NM_001704
4	160396368	rs13119443	A	G	2	0.0003445	0.8149	Intergenic
4	20442232	rs6447984	A	G	2	0.0003449	1.2621	KCNIP4	-	20339336	21559472	NM_147182
6	14153149	rs6924356	G	A	2	0.0003451	1.2483	Intergenic
7	98055681	rs705342	G	A	2	0.0003467	1.2459	Intergenic
8	3092001	rs17319596	C	T	2	0.0003468	0.8029	CSMD1	-	2780281	4839736	NM_033225
5	30262176	rs4446473	A	G	3	0.0003476	1.1728	Intergenic
1	84001177	rs17129251	A	G	2	0.0003489	0.451	Intergenic
10	109784983	rs7082958	A	G	3	0.0003496	0.8278	Intergenic
12	129632537	rs11061008	T	C	2	0.0003501	0.759	Intergenic
1	202763479	rs4252685	C	A	2	0.0003507	1.2307	MDM4	+	202752129	202793871	NM_002393
1	117652409	rs11577581	A	G	3	0.0003508	1.3102	Intergenic
5	30704248	rs7736249	C	T	3	0.0003513	0.7732	Intergenic
8	47534249	rs4313171	T	C	2	0.0003514	0.6263	Intergenic
10	28494539	rs7085245	G	T	2	0.0003517	1.3337	MPP7	-	28379928	28611073	NM_173496
14	68540186	rs242100	G	A	3	0.000352	1.1661	Intergenic
3	60485949	rs12492175	A	C	3	0.0003521	0.8172	FHIT	-	59710075	61212173	NM_001166243
22	35085444	rs136206	A	G	3	0.0003521	0.8432	MYH9	-	35007268	35114009	NM_002473
5	123180519	rs13162753	C	T	3	0.0003525	1.1986	Intergenic
4	169693362	rs10031058	G	A	2	0.0003542	0.8139	PALLD	+	169654791	170086183	NM_001166108
6	5843374	rs12193326	G	A	2	0.0003544	0.799	Intergenic
1	58552030	rs1924565	T	G	3	0.0003548	0.838	Intergenic
12	107751079	rs12424287	G	A	2	0.000356	1.4696	SSH1	-	107700594	107775488	NM_018984
1	231695394	rs4129547	A	G	3	0.0003561	1.1877	Intergenic
4	20443152	rs4988679	A	G	2	0.0003569	1.2613	KCNIP4	-	20339336	21559472	NM_147182
4	20440676	rs9762164	C	T	2	0.000357	1.2625	KCNIP4	-	20339336	21559472	NM_147182
4	11184945	rs10011689	T	C	3	0.0003573	1.6485	Intergenic
11	77675584	rs7107174	T	C	3	0.0003579	0.8104	GAB2	-	77603983	77806516	NM_080491
13	108580569	rs9521184	C	T	3	0.0003584	1.1715	MYO16	+	108046500	108658356	NM_015011
4	125623689	rs962939	C	T	2	0.0003592	1.2446	Intergenic
5	25526751	rs13164982	T	C	3	0.0003594	0.7543	Intergenic
14	76720443	rs11628257	T	A	2	0.0003595	0.7362	TMEM63C	+	76717854	76795591	NM_020431
10	63122152	rs16916501	A	G	2	0.0003599	0.6748	C10orf107	+	63092724	63196097	NM_173554
12	64942106	rs12307857	C	T	2	0.0003605	1.3975	Intergenic
3	106378366	rs16850937	C	T	2	0.0003619	0.8043	Intergenic
7	17679056	rs6977788	A	G	3	0.0003627	0.8555	Intergenic
7	98035467	rs17161415	A	G	2	0.0003631	0.8082	Intergenic
2	73982897	rs7586415	C	T	3	0.0003632	0.8179	ACTG2	+	73973600	74000288	NM_001615
4	160381366	rs11931932	C	T	2	0.0003636	1.2805	Intergenic
1	100125058	rs903125	A	C	3	0.0003637	0.8089	AGL	+	100088227	100162167	NM_000642
7	100562406	rs2227672	T	G	3	0.000364	1.2727	SERPINE1	+	100557089	100569267	NM_000602
10	84419822	rs12358612	T	C	3	0.0003646	1.2737	NRG3	+	83625049	84736915	NM_001165972
13	108550129	rs156998	T	C	2	0.0003646	1.2719	MYO16	+	108046500	108658356	NM_015011
8	43508580	rs4737108	C	T	2	0.0003649	0.7444	Intergenic
2	57480496	rs1401257	G	T	3	0.0003654	0.7143	Intergenic
1	120629349	rs28493424	C	T	2	0.0003661	1.2544	Intergenic
16	51011068	rs1420537	A	C	3	0.0003675	1.2097	Intergenic
6	64653033	rs729291	C	T	3	0.000368	1.1722	EYS	-	64487834	66473839	NM_001142800
7	52981165	rs1032428	T	C	3	0.000368	1.165	Intergenic
14	50445987	rs10132049	G	A	2	0.0003686	1.2765	ABHD12B	+	50408627	50441438	NM_001206673
14	50445987	rs10132049	G	A	2	0.0003686	1.2765	PYGL	-	50441684	50480998	NM_002863
13	100402451	rs2803213	A	C	3	0.000369	0.8501	NALCN-AS1	+	100158579	100509639	NR_047687
1	202779879	rs4252725	A	G	2	0.0003702	1.2248	MDM4	+	202752129	202793871	NM_002393
5	30707745	rs10472747	T	G	3	0.0003714	0.7734	Intergenic
3	106375674	rs16850936	G	A	2	0.0003717	0.8046	Intergenic
11	59753544	rs610352	C	G	2	0.0003718	1.2098	Intergenic
22	39404114	rs133067	C	T	3	0.0003718	1.221	MCHR1	+	39405127	39408764	NM_005297
1	118533284	rs10923507	C	T	3	0.0003721	1.1831	SPAG17	-	118297810	118529371	NM_206996
1	118533952	rs6685352	G	A	2	0.0003727	1.2399	SPAG17	-	118297810	118529371	NM_206996
12	107762088	rs11114068	G	C	2	0.0003728	1.4696	SSH1	-	107700594	107775488	NM_018984
2	156565126	rs6436115	G	A	2	0.0003735	1.224	Intergenic
1	9543994	rs4423053	G	A	2	0.0003752	0.7818	SLC25A33	+	9522114	9565418	NM_032315
3	106367794	rs884477	A	G	2	0.0003763	0.7687	Intergenic
6	110615389	rs12662559	C	A	2	0.0003765	0.504	CDC40	+	110608316	110660115	NM_015891
15	51796087	rs690337	T	C	3	0.0003769	0.8385	WDR72	-	51593229	51842367	NR_102334
11	77586662	rs2510044	A	G	3	0.0003777	0.7938	USP35	+	77577505	77603405	NM_020798
6	15104148	rs9476703	C	T	3	0.0003783	0.8188	Intergenic
16	1468388	rs17808854	T	C	3	0.0003785	0.8488	CLCN7	-	1434934	1465086	NM_001287
6	14154390	rs6915882	T	C	2	0.0003816	1.2094	Intergenic
14	20151250	rs1243658	A	G	2	0.0003821	1.2904	Intergenic
10	66430414	rs10761892	G	T	2	0.0003823	0.8278	Intergenic
4	160393361	rs4691549	C	T	2	0.000384	1.2793	Intergenic
1	9546700	rs9430273	A	C	2	0.0003843	0.7822	SLC25A33	+	9522114	9565418	NM_032315
13	108560008	rs157014	T	C	3	0.0003845	1.1728	MYO16	+	108046500	108658356	NM_015011
2	4115867	rs6759055	G	T	2	0.0003884	1.3175	Intergenic
2	117628726	rs10192798	A	C	2	0.0003888	1.2256	Intergenic
1	202782648	rs2290854	A	G	2	0.0003907	1.2238	MDM4	+	202752129	202793871	NM_002393
3	124089788	rs12638324	A	G	2	0.0003919	1.3582	LOC100129550	+	124088049	124093953	NR_024618
17	53608586	rs9904720	A	C	3	0.0003953	0.8438	Intergenic
10	7861087	rs7095166	A	G	2	0.0003975	0.789	KIN	-	7832930	7869996	NR_045609
7	98055504	rs1009344	T	C	2	0.0003976	1.2422	Intergenic
8	47064736	rs11136104	A	G	2	0.0003976	0.5845	Intergenic
1	18215551	rs794237	A	G	3	0.0003988	0.7157	Intergenic
11	1895099	rs7120258	A	C	2	0.0004007	1.3728	TNNT3	+	1897374	1916512	NM_006757
5	93775867	rs731809	T	C	3	0.0004008	1.5069	KIAA0825	-	93512311	93980065	NM_001145678
2	41052544	rs1981804	G	A	2	0.000402	0.8073	Intergenic
6	165050862	rs10946016	C	A	3	0.0004021	0.8443	Intergenic
13	38725173	rs9576766	G	A	2	0.0004021	0.6714	Intergenic
17	72704502	rs16969749	A	G	2	0.0004022	0.7524	SEC14L1	+	72596319	72724776	NM_001204408
12	54261438	rs11171580	G	T	2	0.0004026	0.8027	Intergenic
14	76694901	rs9989201	T	C	2	0.0004038	0.7423	Intergenic
13	40969866	rs9562311	A	G	3	0.000404	0.7556	Intergenic
10	28491255	rs12254584	A	C	2	0.0004044	1.3298	MPP7	-	28379928	28611073	NM_173496
5	60922056	rs420518	A	C	3	0.0004047	1.4578	Intergenic
2	156564503	rs13026547	A	G	2	0.0004061	1.2206	Intergenic
5	123174963	rs6882579	C	A	3	0.0004061	0.7258	Intergenic
13	53988219	rs2225806	C	A	3	0.0004067	1.2395	Intergenic
6	70737880	rs3793032	T	G	2	0.000407	0.4383	COL19A1	+	70633168	70978878	NM_001858
2	16297389	rs7569508	C	T	3	0.0004071	1.185	Intergenic
11	1941703	rs10769945	C	T	3	0.0004071	0.8616	Intergenic
9	136493115	rs3118548	A	G	2	0.0004072	0.7021	Intergenic
10	99075825	rs11189131	A	G	2	0.0004076	1.2174	FRAT1	+	99069011	99071662	NM_005479
1	120928505	rs2319971	T	G	2	0.0004085	1.2089	Intergenic
15	98930242	rs7168920	T	C	2	0.000409	0.7826	LINS	-	98926950	98959968	NM_001040616
8	48669181	rs4873395	G	A	2	0.0004104	0.8274	KIAA0146	+	48336041	48811116	NM_001080394
1	202789080	rs10900596	T	C	2	0.0004108	1.2229	MDM4	+	202752129	202793871	NM_002393
7	88006636	rs2213991	A	G	3	0.0004111	1.175	Intergenic
22	35962126	rs12170612	T	G	3	0.0004112	0.7751	RAC2	-	35951255	35970251	NM_002872
11	59634426	rs562028	A	C	2	0.000412	1.2223	Intergenic
7	98683305	rs7799650	T	C	2	0.0004124	1.4858	Intergenic
3	55927822	rs11917617	A	G	3	0.000413	0.8495	ERC2	-	55517375	56477431	NM_015576
10	99078672	rs4919091	A	T	2	0.000413	1.2111	FRAT2	-	99082243	99084448	NM_012083
9	20710599	rs4977898	A	C	2	0.0004136	0.7264	FOCAD	+	20648308	20985954	NM_017794
9	20710599	rs4977898	A	C	2	0.0004136	0.7264	MIR491	+	20706103	20706187	NR_030166
14	84782694	rs17796639	G	A	2	0.0004137	1.3247	Intergenic
6	159793858	rs9295101	T	C	2	0.0004139	0.7688	Intergenic
5	103756877	rs10464004	A	G	2	0.0004145	1.2349	Intergenic
14	68846969	rs897325	A	G	3	0.0004153	1.1718	GALNT16	+	68796433	68890943	NM_020692
1	238785543	rs10737846	T	C	3	0.0004156	1.1641	GREM2	-	238719495	238842085	NM_022469
10	63094465	rs10994864	G	A	2	0.0004159	0.8223	C10orf107	+	63092724	63196097	NM_173554
10	63091248	rs12414729	A	C	2	0.0004164	0.6753	C10orf107	+	63092724	63196097	NM_173554
10	36328365	rs2891526	G	A	3	0.0004168	0.8193	Intergenic
5	10205686	rs6868282	A	G	2	0.000417	0.747	Intergenic
12	116486264	rs816182	T	G	2	0.0004173	0.8217	KSR2	-	116375199	116890411	NM_173598
4	170277158	rs17709556	C	A	2	0.0004174	1.3216	SH3RF1	-	170251981	170428824	NM_020870
13	43691122	rs9316073	A	G	3	0.0004175	0.67	Intergenic
7	98031442	rs7809098	G	A	2	0.0004178	0.8122	Intergenic
9	14737412	rs4741426	G	A	2	0.0004182	0.7922	FREM1	-	14724663	14900993	NM_144966
11	77693211	rs6592772	C	A	3	0.0004193	0.813	GAB2	-	77603983	77806516	NM_080491
16	69234180	rs9925191	C	T	2	0.0004194	0.7421	IL34	+	69171298	69252086	NM_001172771
10	61389391	rs12776262	G	T	2	0.0004201	1.2098	C10orf40	-	61387980	61390677	NR_024340
16	74234528	rs3784929	G	A	3	0.0004204	0.7829	KARS	-	74219122	74239086	NM_001130089
16	74234528	rs3784929	G	A	3	0.0004204	0.7829	TERF2IP	+	74239135	74248842	NM_018975
10	66439226	rs10822395	T	A	2	0.0004212	0.8289	Intergenic
18	34203455	rs1789783	T	C	2	0.0004212	0.8259	Intergenic
1	9546872	rs9430274	G	A	2	0.0004217	0.7835	SLC25A33	+	9522114	9565418	NM_032315
13	38716752	rs7993897	T	C	2	0.0004218	0.6728	Intergenic
2	156560995	rs4664191	C	T	2	0.0004222	1.2199	Intergenic
11	59816592	rs2044981	C	T	3	0.0004241	1.1643	MS4A4A	+	59804589	59833021	NM_024021
5	117782240	rs11951938	A	G	2	0.0004246	0.7906	Intergenic
10	99072350	rs7901853	T	C	2	0.0004249	1.2136	FRAT1	+	99069011	99071662	NM_005479
2	234395546	rs6734083	A	G	2	0.0004258	0.7039	Intergenic
11	59702321	rs12453	T	C	2	0.0004277	1.2117	MS4A6A	-	59695655	59708715	NM_152852
7	79564514	rs886364	T	C	3	0.0004279	0.8594	Intergenic
7	100589036	rs6954408	T	C	2	0.0004286	1.2924	AP1S1	+	100584405	100591277	NM_001283
7	100589036	rs6954408	T	C	2	0.0004286	1.2924	MIR4653	+	100589473	100589556	NR_039797
7	100589036	rs6954408	T	C	2	0.0004286	1.2924	VGF	-	100592509	100595572	NM_003378
10	99076351	rs7078288	T	C	2	0.0004301	1.2104	FRAT1	+	99069011	99071662	NM_005479
10	99077320	rs10882898	A	G	2	0.0004301	1.2104	FRAT2	-	99082243	99084448	NM_012083
10	99077895	rs4919089	A	G	2	0.0004301	1.2104	FRAT2	-	99082243	99084448	NM_012083
15	85125768	rs28593062	C	G	2	0.0004315	1.408	AGBL1	+	84486245	85373287	NM_152336
12	28649542	rs1512568	C	A	2	0.0004321	0.6421	Intergenic
9	3387067	rs17715667	C	T	2	0.0004335	0.5849	RFX3	-	3214646	3515983	NM_134428
18	17822144	rs8084283	G	A	2	0.0004351	1.2748	Intergenic
12	130623673	rs11246833	C	G	2	0.0004355	0.7014	Intergenic
8	21625500	rs6587002	C	T	2	0.0004361	1.243	GFRA2	-	21593809	21702292	NM_001495
4	91825412	rs13113267	A	G	3	0.0004365	1.2968	CCSER1	+	91267706	92742393	NM_001145065
21	42874864	rs400625	A	G	2	0.0004369	0.8288	SLC37A1	+	42792810	42874619	NM_018964
1	118378590	rs10733099	G	T	3	0.0004371	1.1619	SPAG17	-	118297810	118529371	NM_206996
18	34207568	rs1145557	C	A	2	0.0004377	0.8264	Intergenic
2	177085114	rs10497446	T	C	2	0.0004379	0.8264	Intergenic
22	30776805	rs17745316	A	G	3	0.0004379	0.7893	SLC5A1	+	30769018	30839011	NM_000343
10	99009134	rs3740522	C	T	3	0.0004381	1.1617	ARHGAP19-SLIT1	-	98902788	99042420	NR_037909
10	99009134	rs3740522	C	T	3	0.0004381	1.1617	ARHGAP19	-	98971919	99042420	NM_032900
17	32302014	rs7217173	G	C	2	0.0004384	1.2939	Intergenic
1	152999400	rs6682291	C	A	2	0.0004395	1.4007	KCNN3	-	152936565	153109378	NM_001204087
16	83743409	rs12922458	G	A	2	0.0004403	1.2409	LOC400548	+	83728256	83740550	NR_033984
10	67397361	rs1670138	C	A	2	0.0004406	1.2211	CTNNA3	-	67349730	69125955	NM_013266
11	608172	rs6598008	A	G	2	0.0004407	0.8188	IRF7	-	602554	605999	NM_001572
11	608172	rs6598008	A	G	2	0.0004407	0.8188	CDHR5	-	606564	615067	NM_021924
14	26666770	rs1245390	A	G	3	0.0004425	1.3493	Intergenic
8	48644651	rs2130413	T	G	2	0.0004444	0.8272	KIAA0146	+	48336041	48811116	NM_001080394
12	28649901	rs1996041	A	G	2	0.000445	0.6364	Intergenic
12	28651393	rs7133546	T	A	2	0.000445	0.6364	Intergenic
3	124087699	rs11721287	C	T	2	0.0004451	1.3543	LOC100129550	+	124088049	124093953	NR_024618
16	83755481	rs6564107	A	G	2	0.0004453	1.2421	Intergenic
3	66995369	rs4411828	T	C	2	0.0004462	0.7808	Intergenic
10	20813886	rs10764235	C	G	2	0.0004462	1.3158	Intergenic
7	86280340	rs2299222	C	T	3	0.0004463	1.5925	GRM3	+	86111165	86332128	NM_000840
7	152037466	rs10253827	T	C	2	0.0004479	1.2549	Intergenic
8	68852594	rs2623825	T	C	2	0.0004488	1.2597	Intergenic
2	25537622	rs2384235	T	C	2	0.00045	0.803	DTNB	-	25453570	25726595	NM_001256308
11	59572216	rs1151102	G	A	3	0.0004518	0.8468	PLAC1L	+	59564323	59572092	NM_173801
13	38699283	rs7335044	C	T	3	0.0004519	0.7304	Intergenic
6	5841551	rs12191107	C	T	3	0.0004524	0.8478	Intergenic
8	118094826	rs3019885	G	T	3	0.0004527	1.1635	SLC30A8	+	118031692	118258134	NM_001172811
11	128982573	rs1493266	A	G	2	0.0004527	0.7058	Intergenic
6	159801067	rs9364522	C	T	2	0.0004532	0.7709	Intergenic
1	215982980	rs6673733	A	G	3	0.0004543	0.8602	SPATA17	+	215871317	216107107	NM_138796
19	953847	rs4807395	A	G	2	0.0004543	1.1948	GRIN3B	+	951436	960723	NM_138690
12	17541538	rs904401	T	C	2	0.0004544	0.715	Intergenic
4	111370798	rs7672908	T	C	3	0.0004546	0.5634	Intergenic
16	83740400	rs2937137	G	T	2	0.0004551	1.3327	LOC400548	+	83728256	83740550	NR_033984
7	5333461	rs10278799	T	C	2	0.000457	0.7301	TNRC18	-	5312948	5429703	NM_001080495
1	167289358	rs1320975	T	C	3	0.0004576	1.2936	Intergenic
18	34214364	rs1145562	A	T	2	0.0004584	0.8254	Intergenic
8	43658198	rs6474486	C	T	3	0.0004593	0.6584	Intergenic
1	9573316	rs6540961	A	G	2	0.0004599	0.7828	TMEM201	+	9571518	9597522	NM_001130924
11	12868643	rs4757963	T	G	2	0.0004603	0.8255	TEAD1	+	12652544	12922860	NM_021961
20	31079929	rs6059023	T	C	2	0.0004604	0.7625	BPIFB2	+	31059044	31075176	NM_025227
20	31079929	rs6059023	T	C	2	0.0004604	0.7625	BPIFB6	+	31083114	31095514	NM_174897
8	18709877	rs11778064	G	T	3	0.0004612	1.1631	PSD3	-	18429092	18915476	NM_015310
18	50968173	rs1942263	G	A	3	0.0004615	0.7957	Intergenic
6	128148100	rs623345	T	C	2	0.0004627	0.8199	THEMIS	-	128071031	128281469	NM_001164687
10	60385073	rs3851235	T	C	3	0.0004636	1.1895	Intergenic
19	53240682	rs7258246	T	C	2	0.0004639	1.4495	CABP5	-	53224451	53239123	NM_019855
19	53240682	rs7258246	T	C	2	0.0004639	1.4495	PLA2G4C	-	53242911	53305921	NM_003706
7	98048494	rs6465691	C	A	3	0.0004642	0.8574	Intergenic
18	9936405	rs4491597	C	G	2	0.0004647	0.6365	VAPA	+	9903954	9950018	NM_003574
7	86285339	rs2299224	C	T	2	0.0004662	1.7233	GRM3	+	86111165	86332128	NM_000840
13	38704412	rs9576762	A	G	3	0.0004663	0.7295	Intergenic
10	99087181	rs4917766	G	A	2	0.000468	1.2108	FRAT2	-	99082243	99084448	NM_012083
5	38406013	rs16903957	C	T	3	0.0004681	0.6893	EGFLAM	+	38294267	38501339	NM_001205301
5	75994819	rs3797446	A	G	2	0.0004684	0.7932	IQGAP2	+	75734904	76039713	NM_006633
18	52456947	rs2234343	T	C	2	0.0004688	1.4917	TXNL1	-	52421050	52456918	NR_024546
21	32006128	rs720935	G	A	2	0.0004693	0.7619	SCAF4	-	31965183	32026302	NM_020706
6	39969573	rs2504805	A	G	3	0.0004698	1.1676	DAAM2	+	39868136	39980631	NM_001201427
4	170272665	rs17544108	C	T	2	0.00047	1.3241	SH3RF1	-	170251981	170428824	NM_020870
14	68835397	rs1890942	A	G	3	0.000472	1.1643	GALNT16	+	68796433	68890943	NM_020692
6	128139463	rs270012	T	C	2	0.0004726	0.8195	THEMIS	-	128071031	128281469	NM_001164687
7	52976090	rs11771058	C	T	2	0.000474	1.2147	Intergenic
8	132788999	rs491614	C	T	3	0.0004747	1.1611	Intergenic
11	59761844	rs611267	G	A	2	0.0004757	1.2026	Intergenic
5	27595416	rs6870385	A	C	2	0.0004777	1.2157	Intergenic
10	65020389	rs10822186	G	A	3	0.0004777	0.8615	REEP3	+	64951128	65054889	NM_001001330
1	118869895	rs4659090	C	T	2	0.0004786	0.8211	Intergenic
1	118870162	rs4659091	G	T	2	0.0004786	0.8211	Intergenic
4	146966354	rs11731491	A	G	3	0.0004795	1.3551	ZNF827	-	146901337	147079057	NM_178835
14	46524736	rs11627056	A	G	2	0.0004822	0.8024	MDGA2	-	46378577	47213907	NM_001113498
8	136518897	rs10106123	A	G	3	0.0004832	1.5186	Intergenic
6	147069790	rs10457805	G	A	2	0.0004833	0.8031	ADGB	+	146961828	147178290	NM_024694
8	47270404	rs11136151	G	A	2	0.0004834	0.8141	Intergenic
5	5649140	rs2438483	G	A	2	0.0004835	1.2499	Intergenic
1	202756180	rs4951393	C	A	2	0.0004849	1.2246	MDM4	+	202752129	202793871	NM_002393
9	6019644	rs1094328	T	C	2	0.000486	1.4446	Intergenic
3	189204049	rs16848771	C	T	3	0.0004862	1.3891	Intergenic
12	28646784	rs1996042	C	T	2	0.0004863	0.648	Intergenic
16	69226793	rs16970406	C	T	2	0.0004882	0.7446	IL34	+	69171298	69252086	NM_001172771
6	5987428	rs6597183	T	G	3	0.0004883	1.1913	Intergenic
7	53692738	rs10236478	C	T	3	0.0004883	0.8196	FLJ45974	-	53690695	53847118	NR_038371
5	169950763	rs10066905	G	C	2	0.0004903	1.7849	KCNIP1	+	169713458	170096214	NM_001034838
7	34855042	rs11768189	G	C	2	0.0004903	1.3717	NPSR1	+	34664421	34884469	NM_207173
16	49490085	rs8061762	A	G	2	0.000492	1.7216	Intergenic
12	28643621	rs1398377	T	C	2	0.0004934	0.6483	Intergenic
16	73812630	rs11864719	T	G	2	0.0004948	0.825	CTRB1	+	73810384	73816323	NM_001906
5	172308784	rs544421	A	G	3	0.0004963	1.1704	ERGIC1	+	172193828	172312294	NM_001031711
16	49486356	rs1948558	A	G	2	0.0004966	1.7274	Intergenic
5	169779136	rs17649320	C	T	2	0.0004973	1.3035	KCNIP1	+	169713458	170096214	NM_001034838
11	40050070	rs7929966	A	G	3	0.0005001	1.1819	Intergenic
7	17679975	rs10253857	T	C	3	0.0005002	0.8342	Intergenic
18	34221918	rs1511938	G	A	2	0.0005011	1.2047	Intergenic
2	117638775	rs332885	A	G	2	0.0005016	1.2228	Intergenic
8	43903535	rs12676279	C	T	2	0.0005017	0.802	Intergenic
20	31094385	rs439255	A	G	2	0.0005024	0.7733	BPIFB6	+	31083114	31095514	NM_174897
11	121073389	rs2887763	A	G	2	0.0005044	1.2053	Intergenic
1	80728907	rs718003	T	C	2	0.0005049	0.7744	Intergenic
11	77695961	rs10899469	C	T	3	0.0005053	0.8152	GAB2	-	77603983	77806516	NM_080491
1	202832806	rs6682208	T	C	2	0.0005061	1.2165	Intergenic
16	74141000	rs12595883	C	T	3	0.0005065	0.7265	TMEM231	-	74129515	74147685	NM_001077418
13	23634246	rs7336618	A	C	3	0.0005066	1.1639	SPATA13	+	23632860	23779212	NM_001166271
13	23634246	rs7336618	A	C	3	0.0005066	1.1639	MIR2276	+	23634554	23634643	NR_031753
6	81556852	rs35052062	A	C	2	0.0005075	0.6432	Intergenic
22	19752096	rs370279	A	C	2	0.0005081	0.7864	LOC400891	+	19730248	19748457	NR_027006
6	165015342	rs9347899	A	G	3	0.0005086	0.8485	Intergenic
6	81572755	rs13213247	C	A	2	0.0005091	0.6425	Intergenic
11	4809910	rs12279647	T	C	2	0.0005093	0.8298	Intergenic
8	132538234	rs273393	A	G	3	0.0005104	0.8184	Intergenic
10	63037314	rs2606098	A	G	2	0.0005104	0.8221	Intergenic
8	29991682	rs167450	G	A	2	0.0005107	1.2483	Intergenic
1	118870865	rs10923586	T	C	2	0.0005114	0.8219	Intergenic
11	77674169	rs10793295	C	G	2	0.0005115	0.7782	GAB2	-	77603983	77806516	NM_080491
19	49923318	rs2927488	A	G	3	0.0005115	0.8291	Intergenic
2	75304864	rs13406588	G	A	2	0.0005121	0.687	Intergenic
9	18647019	rs776778	G	A	2	0.0005149	0.7973	ADAMTSL1	+	18464078	18900947	NM_001040272
6	81560955	rs1416641	G	A	2	0.0005151	0.6436	Intergenic
3	57021132	rs11130559	A	G	2	0.0005164	1.2399	ARHGEF3	-	56736485	57088376	NM_001128615
12	17541979	rs1553115	G	T	2	0.0005166	0.7167	Intergenic
2	25536951	rs6546199	A	G	2	0.0005177	0.8039	DTNB	-	25453570	25726595	NM_001256308
5	141098803	rs17097521	T	G	2	0.000518	0.6577	Intergenic
5	95816064	rs6556924	C	T	2	0.0005183	0.7823	Intergenic
12	118215913	rs4767805	T	C	2	0.0005184	0.82	LOC144742	-	118206012	118225568	NR_024246
8	52212719	rs17735532	T	C	2	0.000519	0.801	Intergenic
7	98038960	rs817754	C	T	2	0.0005193	1.2244	Intergenic
12	30044596	rs7313472	T	C	2	0.0005227	1.547	Intergenic
3	54768490	rs7636321	C	T	3	0.0005242	1.1608	CACNA2D3	+	54131732	55083624	NM_018398
3	170425874	rs1568098	T	G	3	0.0005243	1.2475	MECOM	-	170283980	170864257	NM_004991
2	241086493	rs28443480	T	G	2	0.0005249	0.7568	ANKMY1	-	241067511	241146078	NM_016552
22	48033890	rs2688136	G	A	3	0.0005264	1.2775	Intergenic
6	70409857	rs4706258	G	A	3	0.0005272	1.1799	Intergenic
11	4809835	rs4373916	A	C	2	0.0005272	0.8315	Intergenic
6	156562225	rs4573097	T	C	2	0.0005276	0.7966	Intergenic
2	117660992	rs7578803	A	G	2	0.0005282	1.2285	Intergenic
6	81522778	rs12664845	C	T	2	0.0005284	0.6449	Intergenic
9	5972797	rs1411948	A	G	2	0.0005286	1.4517	KIAA2026	-	5909007	5998003	NM_001017969
10	98980129	rs2861875	G	C	2	0.0005287	1.1979	ARHGAP19-SLIT1	-	98902788	99042420	NR_037909
10	98980129	rs2861875	G	C	2	0.0005287	1.1979	ARHGAP19	-	98971919	99042420	NM_032900
1	163720837	rs285483	A	G	3	0.0005296	0.8289	LOC400794	-	163712702	163817965	NR_026744
13	41287208	rs9594635	A	C	2	0.0005296	0.5832	VWA8	-	41038960	41433221	NM_015058
6	109869025	rs1048197	T	C	2	0.0005298	1.7134	PPIL6	-	109818110	109869067	NM_001111298
6	109869025	rs1048197	T	C	2	0.0005298	1.7134	SMPD2	+	109868623	109871815	NM_003080
6	109869025	rs1048197	T	C	2	0.0005298	1.7134	MICAL1	-	109871958	109883883	NM_022765
20	11554625	rs1474897	T	C	2	0.0005305	0.7959	Intergenic
20	11554648	rs1513579	A	T	2	0.0005305	0.7959	Intergenic
16	55232359	rs1001362	T	C	3	0.000531	0.8121	MT1JP	+	55227151	55228499	NR_036677
16	55232359	rs1001362	T	C	3	0.000531	0.8121	MT1A	+	55230078	55231500	NM_005946
16	55232359	rs1001362	T	C	3	0.000531	0.8121	MT1DP	+	55235099	55236354	NR_027781
2	127589505	rs4663098	T	C	3	0.0005312	0.8238	Intergenic
16	85147581	rs918727	G	A	3	0.0005315	1.1912	MTHFSD	-	85121282	85146342	NR_027489
16	85147581	rs918727	G	A	3	0.0005315	1.1912	FLJ30679	+	85146426	85148406	NR_026674
7	7897060	rs11971467	G	T	2	0.0005316	1.2373	Intergenic
7	86290319	rs17697609	C	T	2	0.0005343	1.7135	GRM3	+	86111165	86332128	NM_000840
22	36173206	rs2097454	T	C	3	0.0005347	1.2006	Intergenic
5	27593876	rs13169838	T	C	2	0.0005374	1.2124	Intergenic
4	17087366	rs4698599	A	G	3	0.0005379	1.1619	Intergenic
8	18926461	rs1025230	A	G	2	0.0005382	1.2209	Intergenic
5	31838311	rs17507185	A	G	3	0.0005399	1.2667	PDZD2	+	31834787	32146795	NM_178140
2	239718903	rs12469994	A	G	3	0.0005405	1.196	HDAC4	-	239634800	239987580	NM_006037
7	100607715	rs6970950	T	C	2	0.0005406	1.2939	NAT16	-	100600493	100610277	NM_198571
7	100608262	rs35587552	G	A	2	0.0005406	1.2939	NAT16	-	100600493	100610277	NM_198571
8	118071048	rs4269571	T	G	2	0.0005408	1.2068	SLC30A8	+	118031692	118258134	NM_001172811
21	31984303	rs2173963	T	C	2	0.0005419	0.7638	SCAF4	-	31965183	32026302	NM_020706
3	54693761	rs515920	T	C	3	0.0005421	1.1608	CACNA2D3	+	54131732	55083624	NM_018398
8	96888986	rs7009898	G	C	2	0.0005427	1.591	LOC100616530	+	96350239	96891547	NR_038201
3	52492246	rs728408	G	A	2	0.000544	1.7611	NISCH	+	52464563	52502128	NM_007184
6	81539378	rs16892247	G	A	2	0.0005445	0.6456	Intergenic
4	6988885	rs9291123	C	T	2	0.0005472	1.2003	TBC1D14	+	6962071	7085746	NM_001113361
20	50280251	rs6021796	C	T	2	0.000548	0.8315	Intergenic
5	27620067	rs10051873	A	G	2	0.0005487	1.2162	Intergenic
4	85520505	rs402672	T	G	3	0.00055	1.2612	Intergenic
2	198846102	rs1379020	T	C	3	0.0005507	0.7349	Intergenic
20	11522717	rs6033187	C	T	3	0.0005521	0.8512	Intergenic
5	87831281	rs7737179	A	G	2	0.0005528	1.2336	Intergenic
2	40932230	rs1456596	A	G	2	0.0005543	0.8131	Intergenic
5	36471251	rs10941293	C	A	2	0.0005543	0.8313	Intergenic
16	55051572	rs34793257	C	T	2	0.0005556	1.2077	OGFOD1	+	55042924	55068908	NM_018233
12	30139039	rs6487878	T	C	2	0.0005572	1.2396	Intergenic
18	71890401	rs12456486	T	C	2	0.0005574	0.7502	Intergenic
8	15501272	rs12114398	T	G	2	0.0005588	1.9608	TUSC3	+	15441966	15668529	NM_006765
16	74204077	rs3743599	T	G	3	0.0005597	0.726	ADAT1	-	74189747	74214722	NM_012091
18	60430591	rs1506232	T	C	3	0.0005599	0.7357	Intergenic
10	109739164	rs11193831	T	C	3	0.0005601	0.8344	Intergenic
11	77677803	rs10899456	G	C	2	0.0005607	0.7796	GAB2	-	77603983	77806516	NM_080491
10	20410407	rs10764197	C	T	2	0.0005608	0.7836	PLXDC2	+	20145377	20609121	NM_032812
2	134700240	rs16830230	G	A	3	0.0005612	1.3237	Intergenic
3	52487358	rs2109559	A	G	2	0.0005623	1.7577	NISCH	+	52464563	52502128	NM_007184
1	58556738	rs10493240	T	G	3	0.0005624	1.226	Intergenic
8	2301019	rs7827690	G	A	2	0.0005628	0.8306	Intergenic
17	7956738	rs3027213	C	A	2	0.0005628	0.8177	ALOXE3	-	7939942	7962959	NM_001165960
22	16778207	rs9604803	A	C	3	0.0005637	0.8574	MICAL3	-	16650415	16887325	NM_015241
8	14957836	rs10108640	C	G	2	0.0005642	0.7602	SGCZ	-	13991743	15140163	NM_139167
11	128760828	rs10894034	C	T	2	0.0005647	0.8323	BARX2	+	128751090	128827384	NM_003658
13	41071001	rs2025969	C	T	3	0.0005648	0.7017	VWA8	-	41038960	41433221	NM_015058
19	50140305	rs5167	G	T	3	0.0005651	1.1764	APOC4-APOC2	+	50137334	50144662	NR_037932
19	50140305	rs5167	G	T	3	0.0005651	1.1764	APOC4	+	50137334	50140593	NM_001646
19	50140305	rs5167	G	T	3	0.0005651	1.1764	APOC2	+	50141078	50144662	NM_000483
3	52485737	rs7620015	G	A	2	0.0005659	1.7572	NISCH	+	52464563	52502128	NM_007184
14	42361005	rs2415770	G	A	3	0.0005662	1.3242	Intergenic
10	54241613	rs11003177	C	T	3	0.0005665	1.157	Intergenic
1	142716044	rs637834	C	T	2	0.0005667	1.341	Intergenic
11	59611961	rs573790	T	C	2	0.0005676	1.2444	MS4A2	+	59612712	59622516	NM_000139
4	160363065	rs12502799	T	G	2	0.0005678	0.8211	Intergenic
4	160366609	rs11730876	T	C	2	0.0005678	0.8211	Intergenic
12	75636141	rs4258422	G	T	2	0.0005679	1.6462	Intergenic
17	58156215	rs17683483	A	C	3	0.0005688	1.2745	10-Mar	-	58132406	58239437	NM_152598
17	58156215	rs17683483	A	C	3	0.0005688	1.2745	MIR548W	+	58152589	58622466	NR_036146
10	106766474	rs790647	A	C	3	0.0005696	1.1931	SORCS3	+	106390848	107014983	NM_014978
6	165023669	rs9347902	G	A	3	0.0005698	0.8476	Intergenic
13	38691468	rs4643180	C	T	3	0.0005701	0.7362	Intergenic
2	25550907	rs6737282	A	G	2	0.0005702	0.8062	DTNB	-	25453570	25726595	NM_001256308
10	112534645	rs7077757	T	C	2	0.0005711	0.8031	RBM20	+	112394144	112589217	NM_001134363
14	84806621	rs10498581	A	G	3	0.0005731	1.2455	Intergenic
4	160086792	rs2114489	T	C	2	0.0005762	0.8252	C4orf45	-	160034133	160175783	NM_152543
10	63165140	rs11598771	A	T	2	0.0005774	0.8134	C10orf107	+	63092724	63196097	NM_173554
22	16800055	rs9605439	C	T	3	0.000579	0.8441	MICAL3	-	16650415	16887325	NM_015241
17	69161257	rs12449935	C	T	3	0.0005794	1.2252	Intergenic
12	22728549	rs2271097	G	A	2	0.0005813	1.401	ETNK1	+	22669342	22734875	NM_018638
4	154231106	rs13112096	G	A	2	0.0005825	0.7044	Intergenic
1	44138044	rs783304	G	A	2	0.0005848	1.3032	ST3GAL3	+	43945790	44169424	NM_174963
3	37833775	rs6782856	A	G	3	0.0005849	0.8551	ITGA9	+	37468816	37836285	NM_002207
3	189187734	rs13086642	A	G	3	0.0005849	1.3665	Intergenic
22	30661594	rs3788437	G	A	3	0.000585	0.8328	C22orf24	-	30659506	30671336	NM_015372
4	121008404	rs17006982	A	G	3	0.0005856	1.2039	Intergenic
12	93855255	rs10128879	C	T	2	0.0005869	1.2757	Intergenic
11	77678896	rs4291702	T	C	2	0.000587	0.7803	GAB2	-	77603983	77806516	NM_080491
10	54240957	rs7918389	C	A	3	0.0005884	1.1563	Intergenic
1	9576784	rs7544083	T	C	2	0.0005887	0.7857	TMEM201	+	9571518	9597522	NM_001130924
7	102978664	rs362721	C	T	3	0.0005893	1.1762	RELN	-	102899466	103417199	NM_005045
10	20410585	rs10827959	G	A	2	0.0005896	0.7844	PLXDC2	+	20145377	20609121	NM_032812
15	66164180	rs1489595	C	T	3	0.000591	1.3492	PIAS1	+	66133625	66267458	NM_016166
17	32610955	rs7221404	T	C	2	0.0005919	0.8247	ACACA	-	32516039	32841015	NM_198839
16	55043749	rs11640819	A	G	2	0.0005935	1.203	NUDT21	-	55020548	55042762	NM_007006
16	55043749	rs11640819	A	G	2	0.0005935	1.203	OGFOD1	+	55042924	55068908	NM_018233
6	114571998	rs9488336	A	G	2	0.0005955	1.2508	Intergenic
20	41871581	rs2179631	T	C	2	0.0005956	1.2449	Intergenic
21	23978086	rs12152057	C	A	3	0.0005956	1.1683	Intergenic
16	74166087	rs12598094	G	A	3	0.0005968	0.7357	GABARAPL2	+	74157749	74169280	NM_007285
14	68848980	rs897327	A	G	3	0.0005977	1.1663	GALNT16	+	68796433	68890943	NM_020692
16	12618466	rs12708762	C	A	3	0.000598	1.2735	Intergenic
17	7955141	rs3027209	G	A	2	0.0005993	1.2677	ALOXE3	-	7939942	7962959	NM_001165960
4	125600372	rs11936470	G	A	2	0.0005995	0.8267	Intergenic
6	165142319	rs10806806	C	T	3	0.0006001	0.86	Intergenic
16	7896127	rs8052349	T	C	3	0.0006019	0.7221	Intergenic
13	103671873	rs10161771	G	T	3	0.0006021	0.7381	Intergenic
18	17832052	rs16961918	C	A	2	0.0006022	1.2654	Intergenic
18	48434137	rs11082932	C	A	3	0.0006032	0.843	DCC	+	48120539	49316271	NM_005215
5	168447445	rs296006	A	G	3	0.0006034	0.8533	SLIT3	-	168021315	168660711	NM_003062
3	54722284	rs589281	T	C	3	0.0006045	0.8613	CACNA2D3	+	54131732	55083624	NM_018398
7	100569180	rs1050955	A	G	2	0.0006046	1.3156	SERPINE1	+	100557089	100569267	NM_000602
7	69843389	rs10950213	G	C	2	0.0006049	0.7204	AUTS2	+	68701840	69895411	NM_001127231
21	21549491	rs2826756	A	G	2	0.0006068	0.5365	NCAM2	+	21292503	21834388	NM_004540
1	108885823	rs6666724	T	C	2	0.0006071	0.6649	Intergenic
11	122515864	rs4936778	T	G	3	0.0006072	0.8492	CLMP	-	122448242	122571217	NM_024769
22	24978940	rs1941120	C	T	2	0.0006073	0.8052	MIR1302-1	-	24513500	25125579	NR_031631
22	24978940	rs1941120	C	T	2	0.0006073	0.8052	SEZ6L	+	24895439	25109563	NM_021115
22	24979421	rs9613142	T	C	2	0.0006073	0.8052	MIR1302-1	-	24513500	25125579	NR_031631
22	24979421	rs9613142	T	C	2	0.0006073	0.8052	SEZ6L	+	24895439	25109563	NM_021115
18	46594685	rs2586772	T	C	2	0.000608	1.2869	MRO	-	46575487	46605752	NM_001127174
5	30226456	rs4134393	A	G	3	0.0006084	1.1655	Intergenic
12	128864661	rs11060567	A	G	2	0.0006088	1.3412	TMEM132D	-	128122223	128954165	NM_133448
11	1861868	rs661348	C	T	2	0.0006093	0.7942	LSP1	+	1830775	1870069	NM_002339
7	53680938	rs2193606	C	A	3	0.0006098	0.8372	Intergenic
2	53731371	rs10865275	G	C	2	0.0006115	0.83	Intergenic
2	198816603	rs1456563	C	T	2	0.0006127	0.7748	Intergenic
9	92666062	rs4529574	G	A	2	0.0006131	0.7514	SYK	+	92603832	92700663	NM_003177
7	98020441	rs705312	T	G	2	0.0006132	0.8103	Intergenic
18	54823578	rs8091043	C	T	2	0.0006139	0.8173	Intergenic
1	118377280	rs6428727	T	C	3	0.0006141	1.1586	SPAG17	-	118297810	118529371	NM_206996
19	53244473	rs2386980	T	C	2	0.0006144	1.4553	PLA2G4C	-	53242911	53305921	NM_003706
9	136493779	rs3118549	A	G	2	0.0006149	0.7099	Intergenic
1	156871015	rs16830483	C	T	2	0.0006158	0.514	SPTA1	-	156847119	156923130	NM_003126
1	199934485	rs12034680	A	G	3	0.0006162	0.8587	NAV1	+	199884072	200062725	NM_020443
22	39768656	rs4821990	G	T	2	0.0006162	1.2242	Intergenic
5	27593556	rs10073761	G	A	2	0.0006165	1.2118	Intergenic
7	138169323	rs878992	T	C	3	0.0006165	1.2302	KIAA1549	-	138166666	138316604	NM_001164665
5	52369501	rs3797499	T	C	2	0.0006167	1.2195	ITGA2	+	52320912	52426366	NM_002203
6	139701784	rs6925308	A	G	2	0.0006189	0.7821	Intergenic
3	10417539	rs17032820	G	A	2	0.0006192	1.3835	ATP2B2	-	10340706	10522268	NM_001001331
9	18630431	rs11795307	C	T	2	0.0006192	0.8048	ADAMTSL1	+	18464078	18900947	NM_001040272
2	198818386	rs12052400	C	A	2	0.0006197	0.7741	Intergenic
1	120664489	rs485586	A	G	2	0.0006222	1.2481	Intergenic
10	81699524	rs12770776	G	A	3	0.0006271	0.6909	SFTPD	-	81687475	81698841	NM_003019
13	103044862	rs9300835	A	G	2	0.0006279	0.73	Intergenic
7	53680467	rs7785632	T	G	3	0.0006286	0.8379	Intergenic
6	78411476	rs12206237	C	T	2	0.000629	1.209	Intergenic
16	55067800	rs14306	A	C	2	0.0006295	1.2055	OGFOD1	+	55042924	55068908	NM_018233
12	32742631	rs11052187	A	G	2	0.0006303	1.4072	DNM1L	+	32723403	32789851	NM_012062
7	100601442	rs10953326	A	G	2	0.0006319	1.287	NAT16	-	100600493	100610277	NM_198571
5	165211218	rs32764	G	A	2	0.0006328	0.7463	Intergenic
5	26826956	rs1155345	T	C	2	0.0006338	1.213	Intergenic
1	50199129	rs7518987	G	A	2	0.0006341	0.6627	AGBL4	-	48771113	50262213	NM_032785
11	1981120	rs4930103	G	A	3	0.0006342	0.8585	Intergenic
1	85085696	rs12062882	T	C	2	0.0006343	0.3324	LPAR3	-	85051673	85131484	NM_012152
1	199914277	rs7523519	T	G	3	0.0006346	0.8579	NAV1	+	199884072	200062725	NM_020443
2	130847995	rs3739122	T	C	3	0.0006351	0.8255	PTPN18	+	130830049	130849452	NM_014369
3	59786502	rs689497	T	G	2	0.0006351	1.6257	FHIT	-	59710075	61212173	NM_001166243
5	2227313	rs6878643	T	C	3	0.0006353	0.8255	Intergenic
19	50461415	rs2240672	A	G	3	0.0006362	1.1723	MARK4	+	50446355	50500381	NM_031417
12	130613760	rs7398686	A	G	2	0.0006366	0.712	Intergenic
13	103032049	rs1812394	C	T	2	0.000637	0.634	Intergenic
4	120977706	rs7690791	A	G	2	0.0006371	0.8333	Intergenic
18	8020442	rs12957856	C	G	2	0.0006396	0.7613	PTPRM	+	7557313	8396859	NM_001105244
1	50307113	rs4525085	G	A	2	0.0006397	0.6622	ELAVL4	+	50286272	50440127	NM_001144777
15	66868444	rs7164503	C	T	2	0.0006397	0.7485	ANP32A	-	66857928	66900315	NM_006305
1	49877229	rs2211459	A	G	2	0.0006403	0.6561	AGBL4	-	48771113	50262213	NM_032785
1	90910374	rs12046571	T	G	2	0.0006406	1.2438	Intergenic
8	48678076	rs4608108	T	G	3	0.0006414	0.8637	KIAA0146	+	48336041	48811116	NM_001080394
5	52372739	rs988557	G	A	2	0.0006417	1.2169	ITGA2	+	52320912	52426366	NM_002203
3	155007122	rs10935951	A	C	3	0.0006418	0.8607	Intergenic
5	16309380	rs7730897	A	G	2	0.0006418	0.746	Intergenic
7	79551009	rs6966238	A	G	2	0.0006423	0.8226	Intergenic
5	27596298	rs10036269	A	G	2	0.0006424	1.2121	Intergenic
1	68406845	rs1864569	G	A	3	0.0006429	1.1674	GNG12-AS1	+	68070558	68441258	NR_040077
1	68406845	rs1864569	G	A	3	0.0006429	1.1674	WLS	-	68336729	68470817	NM_001002292
13	75184400	rs9565188	C	T	2	0.0006447	0.4238	LMO7	+	75092570	75332007	NM_005358
8	47056005	rs4872731	G	A	2	0.0006451	0.8178	Intergenic
3	172547460	rs6763184	G	A	3	0.0006454	1.1942	TNIK	-	172262985	172660891	NM_015028
18	46590152	rs2586775	A	G	2	0.0006464	1.2903	MRO	-	46575487	46605752	NM_001127174
2	127604455	rs12989701	A	C	3	0.000647	1.2186	Intergenic
22	24991500	rs4640491	A	G	2	0.000647	0.8025	MIR1302-1	-	24513500	25125579	NR_031631
22	24991500	rs4640491	A	G	2	0.000647	0.8025	SEZ6L	+	24895439	25109563	NM_021115
16	55068102	rs7198524	C	T	2	0.0006476	1.205	OGFOD1	+	55042924	55068908	NM_018233
7	79578604	rs12673522	A	G	2	0.000648	0.806	Intergenic
2	198816893	rs11674810	G	A	2	0.0006485	0.7749	Intergenic
2	198817567	rs1456562	T	C	2	0.0006485	0.7749	Intergenic
1	50139069	rs12067197	G	A	2	0.0006495	0.6646	AGBL4	-	48771113	50262213	NM_032785
1	108900260	rs1353722	C	A	2	0.0006505	0.6661	FAM102B	+	108904493	108983472	NM_001010883
1	108900455	rs1353725	G	A	2	0.0006505	0.6661	FAM102B	+	108904493	108983472	NM_001010883
9	121028720	rs10818288	T	G	2	0.0006505	1.1997	DBC1	-	120968728	121171560	NM_014618
19	50471475	rs345409	C	T	3	0.0006515	1.158	MARK4	+	50446355	50500381	NM_031417
5	123167119	rs154293	G	A	3	0.000652	0.8645	Intergenic
2	28172638	rs3863	G	A	3	0.0006528	1.1626	BRE	+	27966985	28415271	NM_199193
19	56177006	rs1654523	C	T	3	0.0006528	1.2943	KLK7	-	56171546	56179132	NM_005046
8	98426558	rs11786542	A	G	3	0.0006534	1.4241	Intergenic
4	419720	rs894534	C	T	3	0.0006537	0.861	ABCA11P	-	409223	457998	NR_002451
4	419720	rs894534	C	T	3	0.0006537	0.861	ZNF721	-	423772	482960	NM_133474
1	50319753	rs4926548	A	T	2	0.0006541	0.6621	ELAVL4	+	50286272	50440127	NM_001144777
1	50326960	rs6673246	A	G	2	0.0006541	0.6621	ELAVL4	+	50286272	50440127	NM_001144777
5	172315508	rs2305896	A	G	3	0.0006543	0.8548	ERGIC1	+	172193828	172312294	NM_001031711
5	172315508	rs2305896	A	G	3	0.0006543	0.8548	LOC100268168	-	172314390	172318977	NR_026682
5	172315508	rs2305896	A	G	3	0.0006543	0.8548	RPL26L1	+	172319044	172329380	NM_016093
11	3804006	rs15820	T	C	3	0.0006555	1.2385	PGAP2	+	3775529	3804177	NM_001256235
11	3804006	rs15820	T	C	3	0.0006555	1.2385	RHOG	-	3804783	3818789	NM_001665
1	100183875	rs1541044	C	T	3	0.0006591	0.8196	Intergenic
4	20307202	rs10032537	T	C	2	0.0006594	0.7878	PACRGL	+	20311133	20339078	NM_001258345
7	107207590	rs10247487	T	C	2	0.0006598	0.8228	SLC26A3	-	107193147	107230914	NM_000111
9	18626986	rs17229989	A	G	2	0.0006611	0.7699	ADAMTSL1	+	18464078	18900947	NM_001040272
6	47748056	rs869002	C	T	3	0.0006612	1.1914	GPR111	+	47732284	47773492	NM_153839
12	97101435	rs7966704	T	C	2	0.0006615	0.8066	Intergenic
1	120902013	rs6600671	G	T	2	0.0006638	1.2005	Intergenic
9	80816172	rs11137996	C	T	2	0.0006657	1.288	Intergenic
6	88689728	rs4428477	A	G	3	0.0006669	1.2504	Intergenic
20	11547971	rs6078265	C	T	2	0.000667	0.8371	Intergenic
10	99106893	rs1048445	T	C	3	0.0006673	0.8474	RRP12	-	99106447	99151117	NM_015179
11	61922811	rs7119797	T	C	3	0.0006673	0.8666	Intergenic
21	31973395	rs2833478	C	T	2	0.0006695	0.7665	SCAF4	-	31965183	32026302	NM_020706
5	123172012	rs6895877	G	A	3	0.0006699	1.1731	Intergenic
4	20284932	rs10516359	A	G	3	0.0006702	0.8187	Intergenic
2	185108950	rs12477814	T	C	2	0.0006707	0.7904	Intergenic
20	31117754	rs729865	T	C	2	0.0006709	0.7767	BPIFB3	+	31106890	31125095	NM_182658
4	20441500	rs17555380	C	T	3	0.0006711	0.8513	KCNIP4	-	20339336	21559472	NM_147182
6	156108293	rs9371389	G	A	3	0.000673	0.7962	Intergenic
12	17506936	rs1728200	A	G	2	0.0006736	0.7197	Intergenic
22	16810193	rs1109052	T	C	3	0.0006745	0.8454	MICAL3	-	16650415	16887325	NM_015241
1	149241732	rs771205	T	C	2	0.0006749	0.3754	FAM63A	-	149235924	149247478	NM_001163258
6	47816838	rs9381607	T	A	2	0.0006752	1.2892	Intergenic
5	145089022	rs1654236	G	A	2	0.0006765	1.3142	Intergenic
1	10515883	rs2480782	T	G	2	0.0006774	0.7028	PEX14	+	10457589	10613405	NM_004565
16	55011482	rs6499837	T	C	2	0.0006786	1.1989	AMFR	-	54952864	55016951	NM_001144
12	17525608	rs642578	A	G	2	0.0006789	0.7207	Intergenic
2	37131315	rs13423928	G	A	2	0.00068	0.8313	HEATR5B	-	37061656	37164989	NM_019024
1	117663835	rs12403240	G	A	2	0.0006801	1.3666	Intergenic
22	30657794	rs4820057	G	A	3	0.0006809	0.8334	C22orf24	-	30659506	30671336	NM_015372
11	77681147	rs4944195	C	T	2	0.0006817	0.7818	GAB2	-	77603983	77806516	NM_080491
6	22130570	rs9368393	T	G	2	0.0006819	1.2042	LINC00340	+	21774653	22302595	NR_015410
4	424079	rs1045887	A	G	3	0.0006831	0.8615	ABCA11P	-	409223	457998	NR_002451
4	424079	rs1045887	A	G	3	0.0006831	0.8615	ZNF721	-	423772	482960	NM_133474
12	17516872	rs1163895	G	A	2	0.0006868	0.7375	Intergenic
5	134407210	rs39881	C	A	3	0.000688	0.8438	LOC100996485	+	134396868	134708269	NM_001277348
18	9938041	rs29128	T	C	2	0.000688	0.6555	VAPA	+	9903954	9950018	NM_003574
1	19476688	rs10917331	A	G	2	0.0006883	0.7881	AKR7L	-	19465062	19473155	NR_040288
1	19476688	rs10917331	A	G	2	0.0006883	0.7881	AKR7A3	-	19481643	19487867	NM_012067
4	18017267	rs6853846	G	A	2	0.0006884	1.2045	Intergenic
4	23876247	rs17648420	T	C	3	0.0006884	1.1557	Intergenic
15	74165657	rs2959843	A	C	3	0.0006886	1.1807	C15orf27	+	74139353	74284359	NM_152335
12	30053891	rs7299394	A	G	2	0.0006916	1.5359	Intergenic
10	70183223	rs17462632	A	G	2	0.000692	1.4283	CCAR1	+	70150976	70221315	NM_018237
10	70183223	rs17462632	A	G	2	0.000692	1.4283	SNORD98	+	70184934	70185001	NR_003076
1	64955414	rs7530486	C	T	3	0.0006922	1.1654	Intergenic
1	117679837	rs12088312	T	C	2	0.0006933	1.3647	Intergenic
1	50340263	rs11205682	C	T	2	0.0006935	0.6545	ELAVL4	+	50286272	50440127	NM_001144777
5	38913723	rs533654	A	G	3	0.0006936	0.8562	OSMR	+	38881716	38922516	NM_001168355
6	40233437	rs7751650	G	A	2	0.0006946	1.2166	Intergenic
1	49914328	rs12135410	C	T	2	0.0006957	0.67	AGBL4	-	48771113	50262213	NM_032785
4	109590543	rs1377066	T	C	3	0.0006961	0.8394	Intergenic
22	35052436	rs8136069	A	C	3	0.0006975	0.8584	MYH9	-	35007268	35114009	NM_002473
2	76236241	rs12473082	T	G	2	0.0006977	0.6697	Intergenic
12	22135963	rs7962622	G	A	2	0.0006978	1.2968	Intergenic
21	27746280	rs239620	C	A	2	0.0006982	1.2159	MIR5009	-	27581692	28205400	NR_049807
1	118338108	rs4144543	G	A	3	0.0006994	1.1567	SPAG17	-	118297810	118529371	NM_206996
5	30253910	rs4403185	G	A	3	0.0006996	0.8535	Intergenic
4	109847106	rs2851349	G	A	2	0.0007006	1.2545	Intergenic
11	18707462	rs1550871	A	G	2	0.0007013	1.2329	IGSF22	-	18682427	18704353	NM_173588
11	18707462	rs1550871	A	G	2	0.0007013	1.2329	PTPN5	-	18706050	18769965	NM_032781
5	145083505	rs1654242	A	G	2	0.0007015	1.3158	Intergenic
5	30216197	rs11749859	T	C	3	0.0007018	1.1633	Intergenic
1	9537745	rs6660810	A	G	2	0.0007023	0.8001	SLC25A33	+	9522114	9565418	NM_032315
5	68015556	rs2607378	T	G	2	0.0007029	1.9146	Intergenic
10	133037175	rs11017902	T	G	2	0.0007034	0.7822	Intergenic
3	37833414	rs6780036	A	G	3	0.000704	0.6617	ITGA9	+	37468816	37836285	NM_002207
11	10612199	rs11042902	T	C	3	0.0007041	1.1765	MRVI1	-	10551213	10672111	NM_130385
2	66559289	rs7595378	A	C	2	0.0007043	1.5994	MEIS1	+	66516035	66653395	NM_002398
2	76161867	rs1660568	T	C	2	0.0007044	0.6848	Intergenic
8	141479679	rs11778051	C	T	2	0.000705	1.2098	TRAPPC9	-	140811767	141537860	NM_031466
16	55003500	rs7187883	C	A	2	0.0007055	1.1982	AMFR	-	54952864	55016951	NM_001144
16	55004113	rs2966205	C	T	2	0.0007055	1.1982	AMFR	-	54952864	55016951	NM_001144
4	85598728	rs1017559	G	T	3	0.0007069	1.1834	Intergenic
5	27575539	rs4701558	T	G	2	0.0007084	1.2092	Intergenic
15	98677908	rs12438347	A	G	2	0.0007091	0.8043	ADAMTS17	-	98329165	98699706	NM_139057
13	103046010	rs9558122	C	T	2	0.0007101	0.7331	Intergenic
18	44531224	rs16949934	A	G	3	0.0007111	0.7748	CTIF	+	44319424	44643584	NM_001142397
5	137965436	rs10900855	T	C	3	0.0007116	0.8378	Intergenic
22	48030344	rs2688140	A	G	3	0.0007119	1.2739	Intergenic
14	76678472	rs10144557	G	A	2	0.0007132	0.8199	ZDHHC22	-	76667365	76677887	NM_174976
4	77734394	rs4859453	A	G	3	0.0007138	1.1919	SHROOM3	+	77575276	77923429	NM_020859
14	50445000	rs2356535	T	G	2	0.0007139	1.2636	ABHD12B	+	50408627	50441438	NM_001206673
14	50445000	rs2356535	T	G	2	0.0007139	1.2636	PYGL	-	50441684	50480998	NM_002863
15	51722363	rs2926881	G	T	3	0.0007145	0.853	WDR72	-	51593229	51842367	NR_102334
10	73157133	rs16929266	G	A	3	0.0007166	0.8097	CDH23	+	72826696	73245710	NM_022124
10	73157133	rs16929266	G	A	3	0.0007166	0.8097	C10orf105	-	73141463	73167587	NM_001168390
12	127137001	rs10847525	A	G	2	0.0007167	1.2596	Intergenic
5	145096465	rs1897543	C	A	2	0.0007169	1.3185	Intergenic
2	80679222	rs216645	T	A	2	0.0007172	1.4361	CTNNA2	+	79593567	80729499	NM_004389
10	60973681	rs1763895	T	C	3	0.0007172	0.8506	Intergenic
13	41138425	rs9315855	T	G	3	0.0007187	0.7538	VWA8	-	41038960	41433221	NM_015058
5	27603693	rs2329645	T	G	2	0.0007192	1.21	Intergenic
16	55019501	rs4784667	G	A	2	0.0007201	1.1979	AMFR	-	54952864	55016951	NM_001144
16	55019501	rs4784667	G	A	2	0.0007201	1.1979	NUDT21	-	55020548	55042762	NM_007006
5	87702397	rs2410763	G	T	2	0.0007213	1.2346	TMEM161B-AS1	+	87600454	87768247	NR_039993
20	5468122	rs6053474	G	A	3	0.0007214	0.837	GPCPD1	-	5473079	5539672	NM_019593
20	50288578	rs6126516	T	C	2	0.0007216	0.8348	Intergenic
2	104856829	rs2060783	A	C	3	0.0007221	1.1605	Intergenic
11	59708009	rs632185	G	A	2	0.0007229	1.1995	MS4A6A	-	59695655	59708715	NM_152852
20	9934085	rs8115116	G	A	2	0.000724	0.799	Intergenic
16	86673631	rs4843792	G	A	3	0.0007247	0.8575	Intergenic
10	67396520	rs2105702	C	A	2	0.000725	1.2131	CTNNA3	-	67349730	69125955	NM_013266
7	52980007	rs7795100	T	C	2	0.0007251	1.2024	Intergenic
14	97369551	rs10135506	C	T	2	0.0007252	0.6315	Intergenic
3	55944703	rs11712398	T	C	2	0.000728	0.8298	ERC2	-	55517375	56477431	NM_015576
14	76688610	rs2021853	A	G	2	0.0007282	0.8278	Intergenic
12	22135455	rs11046298	C	A	2	0.0007288	1.2934	Intergenic
12	13726687	rs4764026	C	A	2	0.000729	0.8238	GRIN2B	-	13605676	14024289	NM_000834
10	63158224	rs7070977	G	A	2	0.0007302	0.6899	C10orf107	+	63092724	63196097	NM_173554
6	78412319	rs7752338	G	T	2	0.0007312	1.194	Intergenic
4	109818540	rs2851362	G	T	2	0.0007315	1.2433	Intergenic
4	109818755	rs2851361	A	C	2	0.0007315	1.2433	Intergenic
9	10017632	rs10733202	T	G	2	0.0007317	0.8222	PTPRD	-	8304245	10602723	NM_002839
15	74362076	rs17458234	T	C	3	0.0007317	1.2397	ETFA	-	74295683	74390865	NM_000126
10	102038505	rs17112875	C	T	2	0.0007319	2.0796	BLOC1S2	-	102023024	102036459	NR_046314
10	102038505	rs17112875	C	T	2	0.0007319	2.0796	PKD2L1	-	102037892	102080233	NM_016112
1	49992704	rs4926829	T	C	2	0.0007321	0.6695	AGBL4	-	48771113	50262213	NM_032785
3	144856009	rs1320916	G	A	2	0.0007331	0.6929	SLC9A9	-	144466753	145050063	NM_173653
2	6597244	rs4669075	C	A	3	0.0007333	0.8254	Intergenic
10	99013536	rs793523	G	T	3	0.0007341	1.3078	ARHGAP19-SLIT1	-	98902788	99042420	NR_037909
10	99013536	rs793523	G	T	3	0.0007341	1.3078	ARHGAP19	-	98971919	99042420	NM_032900
8	118029567	rs3020108	G	A	3	0.0007343	1.1707	AARD	+	118019644	118025420	NM_001025357
8	118029567	rs3020108	G	A	3	0.0007343	1.1707	SLC30A8	+	118031692	118258134	NM_001172811
6	76597708	rs1280054	A	G	3	0.0007349	0.8673	MYO6	+	76515628	76685974	NM_004999
8	47120596	rs13267299	A	G	2	0.0007349	0.8223	Intergenic
5	27568508	rs10213971	T	G	2	0.0007351	1.2085	Intergenic
5	27571273	rs6878811	T	G	2	0.0007351	1.2085	Intergenic
4	85582452	rs1444975	G	A	3	0.0007372	1.1799	Intergenic
19	50059617	rs8105340	C	T	2	0.0007394	1.2999	PVRL2	+	50041232	50084325	NM_001042724
4	20339878	rs16869915	C	A	2	0.0007398	0.7561	PACRGL	+	20311133	20339078	NM_001258345
4	20339878	rs16869915	C	A	2	0.0007398	0.7561	KCNIP4	-	20339336	21559472	NM_147182
15	90458123	rs169618	A	G	2	0.0007402	0.8212	SLCO3A1	+	90197941	90516669	NM_001145044
12	22135866	rs7962600	G	C	2	0.0007414	1.294	Intergenic
12	22135902	rs7962880	A	G	2	0.0007414	1.294	Intergenic
14	68544942	rs242091	T	C	3	0.0007418	1.1658	Intergenic
15	26017833	rs7495174	G	A	2	0.0007425	0.7132	OCA2	-	25673615	26018053	NM_000275
12	130643773	rs1006028	C	A	2	0.0007434	0.7727	Intergenic
4	169762595	rs4518206	C	G	2	0.0007435	1.2071	PALLD	+	169654791	170086183	NM_001166108
9	2117315	rs7869436	G	A	2	0.0007437	0.7665	SMARCA2	+	2005341	2183623	NM_003070
5	133412390	rs13357750	G	A	2	0.0007442	1.315	Intergenic
9	2115231	rs7048496	A	C	2	0.0007443	0.764	SMARCA2	+	2005341	2183623	NM_003070
5	117175870	rs11948707	A	G	2	0.0007444	1.1978	Intergenic
6	93846969	rs1324115	G	T	3	0.0007455	1.1712	Intergenic
16	55069237	rs4783941	T	C	2	0.000746	1.2024	OGFOD1	+	55042924	55068908	NM_018233
16	54978928	rs2432538	A	G	2	0.0007485	1.1972	AMFR	-	54952864	55016951	NM_001144
16	54992243	rs2550309	G	A	2	0.0007485	1.1972	AMFR	-	54952864	55016951	NM_001144
16	54998754	rs2966206	G	A	2	0.0007485	1.1972	AMFR	-	54952864	55016951	NM_001144
16	55001940	rs7203090	C	T	2	0.0007485	1.1972	AMFR	-	54952864	55016951	NM_001144
3	54702117	rs583190	C	A	3	0.0007491	1.157	CACNA2D3	+	54131732	55083624	NM_018398
10	70043386	rs2795876	G	A	2	0.0007494	1.2538	TET1	+	69990122	70124245	NM_030625
10	70045997	rs2664421	T	C	2	0.0007494	1.2538	TET1	+	69990122	70124245	NM_030625
14	50438245	rs17123103	A	G	2	0.0007494	1.2609	ABHD12B	+	50408627	50441438	NM_001206673
14	50438245	rs17123103	A	G	2	0.0007494	1.2609	PYGL	-	50441684	50480998	NM_002863
14	50438360	rs28564871	G	A	2	0.0007494	1.2609	ABHD12B	+	50408627	50441438	NM_001206673
14	50438360	rs28564871	G	A	2	0.0007494	1.2609	PYGL	-	50441684	50480998	NM_002863
9	136494425	rs3118551	T	C	2	0.0007508	0.7138	Intergenic
12	2439719	rs2283310	T	C	2	0.0007509	1.2709	CACNA1C	+	2032676	2677376	NM_199460
5	75837093	rs7710225	G	A	2	0.0007516	1.1911	IQGAP2	+	75734904	76039713	NM_006633
5	145079397	rs1025472	A	G	2	0.0007522	1.2976	Intergenic
12	97092461	rs1480073	A	G	2	0.0007554	0.8254	Intergenic
5	73455822	rs10064733	T	C	3	0.0007556	0.8526	Intergenic
6	5982119	rs629744	C	A	3	0.0007565	1.1848	Intergenic
1	9576422	rs3923984	A	G	2	0.0007568	0.7883	TMEM201	+	9571518	9597522	NM_001130924
7	34830391	rs17199853	T	C	3	0.0007568	1.2845	NPSR1	+	34664421	34884469	NM_207173
12	131554987	rs10781655	C	T	2	0.0007572	0.8048	Intergenic
16	86632034	rs8045521	C	T	2	0.0007578	0.8196	BANP	+	86542538	86668425	NM_001173539
16	86632428	rs8044965	G	C	2	0.0007578	0.8196	BANP	+	86542538	86668425	NM_001173539
16	83739588	rs3104836	A	G	2	0.0007585	1.2511	LOC400548	+	83728256	83740550	NR_033984
5	5650448	rs2913314	T	G	2	0.0007588	1.2343	Intergenic
3	128265325	rs6775019	T	C	3	0.0007598	0.8495	Intergenic
12	127117394	rs12424326	A	G	2	0.0007599	0.8223	Intergenic
15	98959669	rs3794505	A	G	2	0.0007604	0.7843	LINS	-	98926950	98959968	NM_001040616
15	98959669	rs3794505	A	G	2	0.0007604	0.7843	ASB7	+	98960277	99009427	NM_198243
22	35076025	rs739097	G	A	3	0.0007612	0.8624	MYH9	-	35007268	35114009	NM_002473
12	17559183	rs1631596	A	G	2	0.0007626	0.7223	Intergenic
7	87968107	rs13225805	G	T	3	0.0007655	1.1631	Intergenic
10	133040628	rs7099724	A	G	2	0.000768	0.7821	Intergenic
4	183351008	rs17307191	G	A	3	0.0007685	1.207	Intergenic
16	85993964	rs8051218	C	T	3	0.000769	0.7229	MAP1LC3B	+	85983301	85995881	NM_022818
16	85993964	rs8051218	C	T	3	0.000769	0.7229	ZCCHC14	-	85997352	86082961	NM_015144
15	85144754	rs16977995	C	T	2	0.0007695	1.448	AGBL1	+	84486245	85373287	NM_152336
5	138800989	rs10900864	A	G	3	0.0007699	0.8564	DNAJC18	-	138773790	138803113	NM_152686
2	52374630	rs1922210	G	A	3	0.000772	1.1706	Intergenic
8	47142739	rs13261801	C	T	2	0.0007725	0.823	Intergenic
1	26894271	rs6598860	A	G	2	0.0007732	1.2599	ARID1A	+	26895108	26981188	NM_006015
1	9549690	rs12124860	A	G	2	0.0007735	0.7996	SLC25A33	+	9522114	9565418	NM_032315
15	93279917	rs2084470	G	A	2	0.0007735	0.8226	Intergenic
6	76640991	rs13202519	C	T	3	0.0007738	0.8678	MYO6	+	76515628	76685974	NM_004999
6	64545206	rs319924	G	A	3	0.000774	1.1568	EYS	-	64487834	66473839	NM_001142800
1	50001984	rs12144042	A	G	2	0.0007741	0.6714	AGBL4	-	48771113	50262213	NM_032785
8	47152365	rs12679978	C	T	2	0.0007753	0.8222	Intergenic
9	107860354	rs10759169	C	T	2	0.0007753	0.774	Intergenic
7	62290742	rs1879840	T	C	2	0.0007759	0.8329	Intergenic
15	24289878	rs8027455	A	C	3	0.0007761	0.8597	Intergenic
4	14721744	rs1378343	G	T	2	0.000777	1.4178	Intergenic
10	94910084	rs10786074	G	T	3	0.0007777	1.1506	Intergenic
16	55025067	rs7192780	A	G	2	0.0007786	1.1982	NUDT21	-	55020548	55042762	NM_007006
1	19465786	rs7527253	C	T	2	0.0007787	0.79	AKR7L	-	19465062	19473155	NR_040288
2	37105739	rs1008838	G	A	3	0.0007813	0.8321	HEATR5B	-	37061656	37164989	NM_019024
16	78006279	rs16950383	T	G	3	0.0007823	0.8018	Intergenic
3	127817550	rs4147483	G	A	2	0.0007824	0.8298	TXNRD3	-	127808584	127856657	NM_052883
5	44264182	rs10512836	C	T	3	0.0007824	0.8279	Intergenic
8	43038047	rs10958736	A	G	2	0.0007844	0.7273	FNTA	+	43030598	43060088	NM_002027
16	7892181	rs11649687	A	G	3	0.0007846	1.2411	Intergenic
4	109815896	rs2851365	G	A	2	0.000785	1.2417	Intergenic
16	55026062	rs8056687	C	T	2	0.0007868	1.1963	NUDT21	-	55020548	55042762	NM_007006
6	81604572	rs10485282	G	A	2	0.0007878	0.6515	Intergenic
7	87974867	rs13244720	G	A	2	0.0007885	1.2037	Intergenic
3	119901614	rs16828784	C	T	2	0.00079	1.2575	Intergenic
6	5849790	rs10155695	C	T	2	0.0007907	0.826	Intergenic
1	49854160	rs10888663	C	A	2	0.000791	0.6721	AGBL4	-	48771113	50262213	NM_032785
13	65555418	rs9529012	C	T	2	0.0007913	0.6737	Intergenic
1	50343252	rs11205683	A	G	2	0.000792	0.6519	ELAVL4	+	50286272	50440127	NM_001144777
10	70078732	rs7896856	G	A	2	0.0007932	1.4255	TET1	+	69990122	70124245	NM_030625
13	58391338	rs1340565	C	A	2	0.0007935	1.2469	Intergenic
5	87634574	rs2115885	A	G	2	0.000794	1.2326	TMEM161B-AS1	+	87600454	87768247	NR_039993
2	104870754	rs1026220	A	G	3	0.0007941	1.1575	Intergenic
5	101289699	rs1453115	A	G	3	0.0007942	0.801	Intergenic
6	161066694	rs1897108	G	A	2	0.0007952	1.218	PLG	+	161043214	161095075	NM_000301
2	117657556	rs1350986	G	A	2	0.0007961	1.1995	Intergenic
8	47260967	rs4872703	C	T	2	0.0007961	0.8206	Intergenic
11	77688478	rs11602622	G	A	2	0.0007961	0.7842	GAB2	-	77603983	77806516	NM_080491
17	53772001	rs1985749	G	A	3	0.0007969	0.8492	BZRAP1-AS1	+	53757809	53786087	NR_038410
17	53772001	rs1985749	G	A	3	0.0007969	0.8492	MIR4736	-	53768335	53768382	NR_039889
9	98205397	rs12002084	C	T	2	0.0007973	1.8767	ZNF367	-	98188045	98220490	NM_153695
1	108903374	rs11102031	T	C	2	0.0007974	0.6739	FAM102B	+	108904493	108983472	NM_001010883
7	87979115	rs2213992	A	G	2	0.0007977	1.2047	Intergenic
11	37478185	rs2860762	T	C	3	0.0007978	1.1588	Intergenic
5	73455899	rs10072489	G	A	3	0.0007992	0.8532	Intergenic
10	99429891	rs2151932	A	G	2	0.0007992	1.1969	PI4K2A	+	99390432	99426177	NM_018425
10	99429891	rs2151932	A	G	2	0.0007992	1.1969	AVPI1	-	99427170	99437005	NM_021732
10	99430235	rs7895426	A	G	2	0.0007992	1.1969	PI4K2A	+	99390432	99426177	NM_018425
10	99430235	rs7895426	A	G	2	0.0007992	1.1969	AVPI1	-	99427170	99437005	NM_021732
10	99430506	rs10882986	C	T	2	0.0007992	1.1969	PI4K2A	+	99390432	99426177	NM_018425
10	99430506	rs10882986	C	T	2	0.0007992	1.1969	AVPI1	-	99427170	99437005	NM_021732
22	31181712	rs5754097	T	C	3	0.0007994	1.2506	BPIFC	-	31139833	31183373	NM_174932
6	64655045	rs1482451	A	G	3	0.0008009	1.1726	EYS	-	64487834	66473839	NM_001142800
1	202785465	rs4245739	C	A	2	0.0008011	1.219	MDM4	+	202752129	202793871	NM_002393
12	4584296	rs17774188	A	G	2	0.0008017	1.4338	DYRK4	+	4569504	4593302	NM_003845
16	25880097	rs12931133	A	G	3	0.0008018	1.1975	HS3ST4	+	25610847	26056510	NM_006040
21	20675442	rs10432923	C	T	3	0.0008018	0.8201	Intergenic
1	84081079	rs932448	C	T	2	0.000802	1.1948	MIR548AP	-	84032185	84151647	NR_049805
15	33803377	rs5017692	T	C	3	0.000803	1.1839	DPH6-AS1	+	33625687	33938494	NR_038251
4	37455716	rs41457545	C	T	2	0.0008033	1.2506	Intergenic
8	2272563	rs2266378	A	C	2	0.0008033	0.8207	Intergenic
13	103044530	rs9300834	A	C	2	0.0008043	0.7354	Intergenic
14	65369906	rs8010134	G	A	3	0.0008062	1.1876	Intergenic
15	93300157	rs11073409	T	G	3	0.000807	0.8585	Intergenic
8	52308699	rs1437603	A	G	2	0.0008072	0.8121	Intergenic
2	212934789	rs11892564	G	A	2	0.0008075	1.2633	ERBB4	-	211948686	213111597	NM_005235
10	99005354	rs7074678	G	A	3	0.0008078	0.855	ARHGAP19-SLIT1	-	98902788	99042420	NR_037909
10	99005354	rs7074678	G	A	3	0.0008078	0.855	ARHGAP19	-	98971919	99042420	NM_032900
3	55991712	rs732255	T	C	3	0.0008103	0.8585	ERC2	-	55517375	56477431	NM_015576
10	128133328	rs10751556	C	A	2	0.0008104	0.7791	C10orf90	-	128103563	128200000	NM_001004298
14	26682620	rs1909784	A	G	2	0.000811	1.278	Intergenic
6	110639498	rs6918148	C	T	3	0.0008117	0.7961	CDC40	+	110608316	110660115	NM_015891
13	41321706	rs7990886	G	A	3	0.0008118	0.7438	VWA8	-	41038960	41433221	NM_015058
10	79982041	rs10509399	C	T	3	0.0008119	0.719	Intergenic
11	85547385	rs7113976	T	C	2	0.0008136	1.1979	Intergenic
11	77691140	rs4417308	C	A	2	0.0008138	0.7846	GAB2	-	77603983	77806516	NM_080491
16	86647669	rs9930033	C	T	2	0.0008149	0.8206	BANP	+	86542538	86668425	NM_001173539
8	3104238	rs17319659	C	G	2	0.0008151	0.7897	CSMD1	-	2780281	4839736	NM_033225
5	2226056	rs6555067	T	C	2	0.0008153	0.7821	Intergenic
2	121187441	rs12463908	C	A	3	0.0008163	0.8353	Intergenic
2	73817722	rs2421678	C	T	3	0.0008177	0.7219	TPRKB	-	73810464	73818025	NM_016058
5	26831533	rs1154736	T	C	2	0.000818	1.2025	Intergenic
6	64562211	rs319920	G	A	3	0.000818	1.1561	EYS	-	64487834	66473839	NM_001142800
9	136500061	rs3132278	T	C	2	0.000818	0.7523	Intergenic
1	71760084	rs12754625	T	C	3	0.0008182	0.7448	NEGR1	-	71641212	72520865	NM_173808
21	42570264	rs2234718	G	A	3	0.0008185	1.2031	ABCG1	+	42492867	42590423	NM_207627
6	77347880	rs4706623	C	T	3	0.0008189	1.1656	Intergenic
15	90456266	rs207959	T	C	2	0.0008192	0.8137	SLCO3A1	+	90197941	90516669	NM_001145044
7	15834645	rs7782571	T	C	3	0.0008196	0.8543	Intergenic
1	58566605	rs1213640	A	C	3	0.0008199	0.8477	Intergenic
1	120908858	rs2319969	T	C	2	0.0008206	1.1996	Intergenic
16	77974064	rs7192960	T	C	3	0.0008214	0.8158	Intergenic
8	22376751	rs10108011	G	A	2	0.0008228	0.8353	PPP3CC	+	22354427	22454602	NM_001243974
4	109825097	rs2575642	T	C	2	0.0008229	1.2407	Intergenic
7	87959974	rs2106292	T	G	3	0.0008241	1.161	Intergenic
22	19751425	rs429738	A	C	3	0.0008243	0.843	LOC400891	+	19730248	19748457	NR_027006
3	22835615	rs11718398	A	G	2	0.0008247	0.8069	Intergenic
1	240736003	rs2654856	T	C	3	0.0008273	1.1775	PLD5	-	240318311	240754621	NM_152666
7	152485828	rs7803687	G	A	2	0.000828	0.8087	Intergenic
10	99425720	rs1046249	G	A	2	0.0008287	1.1963	PI4K2A	+	99390432	99426177	NM_018425
10	99425720	rs1046249	G	A	2	0.0008287	1.1963	AVPI1	-	99427170	99437005	NM_021732
10	99427812	rs3750564	G	A	2	0.0008287	1.1963	PI4K2A	+	99390432	99426177	NM_018425
10	99427812	rs3750564	G	A	2	0.0008287	1.1963	AVPI1	-	99427170	99437005	NM_021732
4	37455995	rs41352046	G	A	2	0.0008293	1.2499	Intergenic
16	54970235	rs2587873	C	G	2	0.0008322	1.1953	AMFR	-	54952864	55016951	NM_001144
16	54974548	rs2440467	T	C	2	0.0008322	1.1953	AMFR	-	54952864	55016951	NM_001144
5	59155340	rs6869459	A	C	3	0.0008325	0.864	PDE4D	-	58300622	59819682	NM_001165899
13	101878053	rs16960147	G	A	2	0.0008333	0.6447	Intergenic
3	60723766	rs4974227	G	A	3	0.0008337	0.8244	FHIT	-	59710075	61212173	NM_001166243
5	26840826	rs1505053	C	A	2	0.0008337	1.2021	Intergenic
16	85756539	rs8044338	T	C	2	0.0008343	1.2281	Intergenic
22	41206548	rs4822135	T	C	3	0.0008346	1.1584	Intergenic
4	186788618	rs1471794	G	T	2	0.000836	1.2275	SORBS2	-	186743591	187114864	NM_001270771
22	35062483	rs1557540	C	T	3	0.0008374	0.8651	MYH9	-	35007268	35114009	NM_002473
5	145079510	rs1025473	G	A	2	0.0008378	1.3106	Intergenic
1	118881089	rs6428751	A	G	3	0.0008385	0.8674	Intergenic
14	76424671	rs1554958	A	G	2	0.0008394	1.2595	Intergenic
3	39432865	rs4676495	G	T	3	0.000841	0.8664	RPSA	+	39423207	39429036	NM_002295
18	54293292	rs2001517	A	G	2	0.0008433	0.8187	Intergenic
5	101369022	rs5020202	C	A	3	0.0008439	0.8654	Intergenic
5	115875140	rs4920916	G	A	3	0.0008441	1.2214	SEMA6A	-	115807149	115938450	NM_020796
7	62278968	rs1806453	C	T	2	0.0008449	0.834	Intergenic
4	109803234	rs1369962	A	G	2	0.0008467	1.24	OSTC	+	109791189	109808427	NM_001267818
8	57613866	rs2610034	T	C	3	0.0008482	1.1564	LOC100507632	-	57593431	57634936	NR_038236
4	7221463	rs9991298	C	T	2	0.0008483	0.8192	Intergenic
3	22631904	rs6763517	A	G	2	0.0008486	0.7889	Intergenic
6	11850575	rs17402850	G	A	3	0.0008494	0.8124	ADTRP	-	11821873	11887266	NM_001143948
13	68857922	rs9541921	A	C	3	0.0008503	0.8649	Intergenic
11	77691705	rs10899467	T	G	2	0.0008504	0.7853	GAB2	-	77603983	77806516	NM_080491
19	49917185	rs2965109	T	C	2	0.0008513	0.7952	Intergenic
1	41571747	rs4660187	A	G	3	0.0008524	0.8613	Intergenic
2	53760439	rs7556791	G	A	2	0.0008529	0.8349	ASB3	-	53750620	53867650	NM_016115
2	53760439	rs7556791	G	A	2	0.0008529	0.8349	GPR75-ASB3	-	53750957	53940674	NM_001164165
9	138095067	rs871095	C	T	2	0.0008529	0.7598	NACC2	-	138038203	138126952	NM_144653
6	156117612	rs2353783	G	A	3	0.0008532	0.7998	Intergenic
6	733169	rs9328417	C	T	2	0.0008533	0.7478	Intergenic
14	26321335	rs990173	C	T	2	0.0008534	1.2007	Intergenic
16	58918546	rs9302723	A	G	3	0.0008534	1.1688	Intergenic
8	48792760	rs11778548	G	A	2	0.0008541	0.8357	KIAA0146	+	48336041	48811116	NM_001080394
16	83737178	rs882718	C	A	2	0.0008544	1.2429	LOC400548	+	83728256	83740550	NR_033984
1	87650128	rs1006625	G	A	3	0.0008547	1.2134	Intergenic
8	133556707	rs2167171	C	A	3	0.0008547	0.7747	KCNQ3	-	133202286	133562186	NM_004519
1	87641128	rs4655956	G	A	3	0.0008556	1.18	Intergenic
16	54961400	rs2587866	C	T	2	0.0008569	1.1948	AMFR	-	54952864	55016951	NM_001144
16	54964427	rs2587869	G	A	2	0.0008569	1.1948	AMFR	-	54952864	55016951	NM_001144
16	54970027	rs2587871	T	C	2	0.0008569	1.1948	AMFR	-	54952864	55016951	NM_001144
12	17508378	rs1694747	A	C	2	0.0008573	0.7254	Intergenic
14	40409569	rs12897166	G	T	3	0.0008587	0.8317	Intergenic
10	99425477	rs1046221	C	A	2	0.0008591	1.1957	PI4K2A	+	99390432	99426177	NM_018425
10	99425477	rs1046221	C	A	2	0.0008591	1.1957	AVPI1	-	99427170	99437005	NM_021732
1	87649814	rs12758097	A	G	3	0.0008612	0.8614	Intergenic
6	128121581	rs270010	C	T	2	0.0008616	0.8362	THEMIS	-	128071031	128281469	NM_001164687
4	62503784	rs989295	T	A	2	0.0008633	1.4944	LPHN3	+	62045433	62620763	NM_015236
22	35059020	rs4820234	A	G	3	0.0008633	0.8653	MYH9	-	35007268	35114009	NM_002473
6	22102663	rs9295532	G	T	2	0.0008634	1.217	LINC00340	+	21774653	22302595	NR_015410
11	128286549	rs6590357	T	C	2	0.0008638	1.273	KCNJ5	+	128266522	128293161	NM_000890
11	128287188	rs7118824	T	G	2	0.0008638	1.273	KCNJ5	+	128266522	128293161	NM_000890
16	54957015	rs1382359	G	A	2	0.0008645	1.1947	AMFR	-	54952864	55016951	NM_001144
16	54957336	rs2617848	T	C	2	0.0008645	1.1947	AMFR	-	54952864	55016951	NM_001144
16	54958348	rs2241956	T	C	2	0.0008645	1.1947	AMFR	-	54952864	55016951	NM_001144
16	54958795	rs2241957	T	C	2	0.0008645	1.1947	AMFR	-	54952864	55016951	NM_001144
8	27520436	rs11136000	T	C	3	0.0008646	0.8557	CLU	-	27510350	27528245	NM_001831
3	109270215	rs10933931	T	C	3	0.0008648	1.3788	CD47	-	109244630	109292625	NM_001777
8	47553219	rs4631476	C	A	2	0.0008652	0.8171	Intergenic
14	50440880	rs11157780	T	C	2	0.0008661	1.258	ABHD12B	+	50408627	50441438	NM_001206673
14	50440880	rs11157780	T	C	2	0.0008661	1.258	PYGL	-	50441684	50480998	NM_002863
14	50440900	rs11157781	T	C	2	0.0008661	1.258	ABHD12B	+	50408627	50441438	NM_001206673
14	50440900	rs11157781	T	C	2	0.0008661	1.258	PYGL	-	50441684	50480998	NM_002863
9	1344036	rs7871293	T	C	2	0.0008667	0.8257	Intergenic
1	101966484	rs2225904	A	G	2	0.0008677	1.2093	Intergenic
4	109800543	rs12643059	C	G	2	0.0008683	1.2395	OSTC	+	109791189	109808427	NM_001267818
6	40063344	rs2984436	A	C	2	0.000869	0.8148	Intergenic
2	66556755	rs6730722	G	A	2	0.0008691	1.6994	MEIS1	+	66516035	66653395	NM_002398
1	118901504	rs11590559	A	G	3	0.0008692	0.8676	Intergenic
15	60184526	rs1370176	A	G	3	0.0008698	1.1871	Intergenic
2	121186435	rs10496562	C	T	2	0.000872	0.7924	Intergenic
6	14173216	rs9476478	A	C	2	0.0008726	1.2125	Intergenic
10	28489980	rs7081378	A	G	3	0.0008738	1.2437	MPP7	-	28379928	28611073	NM_173496
4	170252552	rs13139803	T	C	2	0.0008739	1.2866	SH3RF1	-	170251981	170428824	NM_020870
11	77704164	rs4492844	G	A	2	0.0008742	0.7857	GAB2	-	77603983	77806516	NM_080491
3	55917587	rs4541375	G	C	2	0.0008758	0.8313	ERC2	-	55517375	56477431	NM_015576
1	215842304	rs6704368	T	A	2	0.0008765	1.1989	GPATCH2	-	215670456	215871032	NM_018040
6	732703	rs12198560	G	T	2	0.0008782	0.7476	Intergenic
11	3806416	rs7929197	T	C	3	0.0008803	1.1955	PGAP2	+	3775529	3804177	NM_001256235
11	3806416	rs7929197	T	C	3	0.0008803	1.1955	RHOG	-	3804783	3818789	NM_001665
2	75273253	rs10204684	A	C	2	0.0008807	0.6993	TACR1	-	75127097	75280153	NM_001058
1	215959513	rs10495072	C	T	3	0.0008835	0.7443	SPATA17	+	215871317	216107107	NM_138796
11	128290952	rs10790977	G	A	2	0.0008836	1.2699	KCNJ5	+	128266522	128293161	NM_000890
15	90454002	rs207962	G	C	2	0.000885	0.8139	SLCO3A1	+	90197941	90516669	NM_001145044
13	21789393	rs465174	A	G	3	0.0008852	0.8564	Intergenic
1	215955595	rs4347270	G	A	3	0.0008853	0.7447	SPATA17	+	215871317	216107107	NM_138796
8	13794345	rs9325678	T	G	3	0.0008853	1.1547	Intergenic
1	230139751	rs701158	G	A	3	0.0008854	1.1517	TSNAX-DISC1	+	229731021	230243641	NR_028393
1	230139751	rs701158	G	A	3	0.0008854	1.1517	DISC1	+	229829183	230243641	NM_001164537
14	50441274	rs11157782	T	C	2	0.0008862	1.2567	ABHD12B	+	50408627	50441438	NM_001206673
14	50441274	rs11157782	T	C	2	0.0008862	1.2567	PYGL	-	50441684	50480998	NM_002863
8	14979661	rs1454591	C	G	2	0.0008876	0.8009	SGCZ	-	13991743	15140163	NM_139167
2	66573007	rs10166707	G	A	2	0.0008888	1.6027	MEIS1	+	66516035	66653395	NM_002398
10	43087822	rs11816932	G	A	2	0.0008894	0.7897	Intergenic
19	52681800	rs830150	A	C	2	0.0008899	1.4972	KPTN	-	52670211	52679333	NM_007059
19	52681800	rs830150	A	C	2	0.0008899	1.4972	NAPA-AS1	+	52679350	52696666	NR_038452
19	52681800	rs830150	A	C	2	0.0008899	1.4972	NAPA	-	52682702	52710327	NR_038456
7	83434619	rs797810	T	C	3	0.0008902	1.1734	SEMA3A	-	83425594	83662153	NM_006080
9	5973508	rs1888703	T	G	2	0.0008903	1.4231	KIAA2026	-	5909007	5998003	NM_001017969
4	109786702	rs2575649	G	T	2	0.0008904	1.2389	OSTC	+	109791189	109808427	NM_001267818
1	101971602	rs1445227	G	A	2	0.0008951	1.2094	Intergenic
1	101972678	rs12565816	G	T	2	0.0008951	1.2094	Intergenic
7	25974577	rs745580	A	G	3	0.0008971	0.8658	Intergenic
18	46597648	rs2586770	G	A	3	0.0008973	1.2167	MRO	-	46575487	46605752	NM_001127174
2	40940895	rs7592667	T	C	3	0.0008986	0.8633	Intergenic
6	24648518	rs2744604	T	C	3	0.0008992	1.1675	ALDH5A1	+	24603175	24645414	NM_170740
6	24648518	rs2744604	T	C	3	0.0008992	1.1675	KIAA0319	-	24652310	24754362	NM_001168374
5	27340648	rs1020813	G	A	2	0.0009032	1.3092	Intergenic
6	161053036	rs1853017	T	C	2	0.0009032	1.2171	PLG	+	161043214	161095075	NM_000301
22	27465889	rs5762766	C	T	3	0.0009032	0.8364	CHEK2	-	27413730	27467822	NM_001257387
22	27465889	rs5762766	C	T	3	0.0009032	0.8364	HSCB	+	27468042	27483496	NM_172002
13	58794535	rs12853955	C	A	3	0.0009046	0.8612	Intergenic
4	102920255	rs7695738	A	G	3	0.0009052	0.7841	Intergenic
10	126349090	rs4962397	A	C	2	0.0009056	0.7414	FAM53B	-	126297852	126422920	NM_014661
2	228458483	rs4973445	G	T	2	0.0009059	0.8384	DAW1	+	228444570	228497270	NM_178821
5	90981433	rs1566996	C	G	2	0.0009062	0.7144	Intergenic
5	133356459	rs10491289	G	A	2	0.0009072	1.2912	VDAC1	-	133335464	133368723	NM_003374
1	50282316	rs10888678	A	G	2	0.0009074	0.6713	ELAVL4	+	50286272	50440127	NM_001144777
6	88437940	rs2754244	G	C	2	0.0009088	1.252	ORC3	+	88356503	88433891	NM_012381
6	88437940	rs2754244	G	C	2	0.0009088	1.252	AKIRIN2	-	88441296	88468704	NM_018064
1	40694649	rs10489434	C	T	2	0.0009098	0.7742	ZFP69B	+	40688923	40701977	NM_023070
13	103043153	rs2026356	T	C	2	0.0009103	0.7379	Intergenic
7	100533378	rs10953322	A	G	2	0.0009122	1.312	Intergenic
6	83805282	rs6934537	C	T	3	0.0009129	0.7913	UBE3D	-	83658905	83832264	NM_198920
4	109785053	rs2851387	G	A	2	0.000913	1.2383	Intergenic
12	116426703	rs11068520	T	C	2	0.0009137	1.2817	KSR2	-	116375199	116890411	NM_173598
2	76442450	rs6547078	C	T	3	0.0009148	0.6715	Intergenic
6	94981949	rs416145	G	A	3	0.0009152	0.8478	Intergenic
7	7920823	rs6950643	A	G	2	0.0009153	0.8313	Intergenic
16	86649593	rs11117354	T	C	2	0.0009155	0.8176	BANP	+	86542538	86668425	NM_001173539
2	197790952	rs6715021	A	G	2	0.0009163	1.2549	ANKRD44	-	197559630	197883766	NM_001195144
6	156493186	rs11156081	C	G	2	0.0009163	1.2159	Intergenic
16	86012884	rs7191969	C	T	3	0.0009184	0.7231	ZCCHC14	-	85997352	86082961	NM_015144
20	20329930	rs6081988	C	T	2	0.0009195	1.3639	RALGAPA2	-	20318271	20641266	NM_020343
16	85256524	rs12922111	T	C	3	0.0009198	1.195	Intergenic
16	86634818	rs4843779	C	T	2	0.0009203	0.8223	BANP	+	86542538	86668425	NM_001173539
15	96937675	rs11636483	G	A	3	0.0009206	0.8439	Intergenic
7	135593804	rs1365353	A	G	3	0.0009225	0.8678	Intergenic
2	25545616	rs13386804	G	T	3	0.0009227	0.8492	DTNB	-	25453570	25726595	NM_001256308
6	40320601	rs6458144	T	C	3	0.0009231	1.1707	Intergenic
13	67126995	rs9564420	T	G	3	0.0009239	1.4489	Intergenic
1	183821099	rs193088	C	T	3	0.0009241	0.8687	Intergenic
5	101372703	rs3846609	C	T	3	0.0009256	0.8663	Intergenic
1	238779521	rs12069813	G	A	3	0.0009257	1.1593	GREM2	-	238719495	238842085	NM_022469
20	57539142	rs3905228	A	C	3	0.0009259	1.1689	Intergenic
13	103043114	rs2026357	T	G	2	0.0009266	0.7382	Intergenic
22	30665416	rs9609389	A	G	2	0.0009266	1.2754	C22orf24	-	30659506	30671336	NM_015372
6	159789109	rs4708828	C	T	2	0.0009284	0.7833	Intergenic
4	11373593	rs1492501	A	G	2	0.0009292	1.2726	Intergenic
6	161057653	rs4252109	G	T	2	0.0009296	1.2149	PLG	+	161043214	161095075	NM_000301
1	76563751	rs4628548	G	A	3	0.00093	0.8217	ST6GALNAC3	+	76312976	76869257	NM_152996
4	20336562	rs9291412	G	A	3	0.0009308	0.7968	PACRGL	+	20311133	20339078	NM_001258345
4	20336562	rs9291412	G	A	3	0.0009308	0.7968	KCNIP4	-	20339336	21559472	NM_147182
2	25553938	rs504855	A	G	2	0.0009312	0.813	DTNB	-	25453570	25726595	NM_001256308
13	103107177	rs979300	A	G	2	0.0009313	0.5299	Intergenic
1	195577851	rs2786106	T	C	3	0.0009316	0.8277	CRB1	+	195437214	195714208	NM_001257965
20	51321529	rs1877430	G	A	3	0.0009316	0.8146	TSHZ2	+	51022352	51545276	NM_173485
8	70046521	rs10504434	C	T	2	0.0009317	0.8148	LOC100505718	-	69986591	70178979	NR_039986
10	28494576	rs7101051	A	C	3	0.0009331	1.2423	MPP7	-	28379928	28611073	NM_173496
5	145104594	rs12651915	T	C	2	0.0009354	1.3124	Intergenic
16	86636645	rs11641065	A	G	2	0.0009357	0.8225	BANP	+	86542538	86668425	NM_001173539
6	149311657	rs10872625	A	T	2	0.0009367	0.8405	UST	+	149109963	149439819	NM_005715
10	20391875	rs16919789	T	C	2	0.0009372	0.7735	PLXDC2	+	20145377	20609121	NM_032812
1	117850491	rs10923323	A	G	2	0.0009385	1.3498	MAN1A2	+	117711607	117869843	NM_006699
5	165138776	rs13169858	A	G	2	0.0009391	1.2667	Intergenic
6	70369272	rs4707218	T	C	3	0.000941	1.171	Intergenic
4	163729915	rs7670731	A	G	2	0.0009438	1.2135	Intergenic
10	129138470	rs7904011	C	A	3	0.0009463	1.2608	DOCK1	+	128584012	129140770	NM_001380
3	54773298	rs3732748	G	A	2	0.0009465	1.1914	CACNA2D3	+	54131732	55083624	NM_018398
5	150539914	rs7717323	G	C	2	0.0009468	1.3176	CCDC69	-	150540805	150583847	NM_015621
15	35334826	rs4350533	A	G	2	0.0009477	0.819	Intergenic
18	44520172	rs4939800	G	A	3	0.0009481	0.7958	CTIF	+	44319424	44643584	NM_001142397
10	79982413	rs2019432	G	A	3	0.0009496	0.7249	Intergenic
8	52197576	rs11991676	C	T	3	0.0009497	1.3919	Intergenic
14	22373934	rs3751488	A	G	3	0.0009497	1.1865	MRPL52	+	22368931	22374086	NM_181306
14	22373934	rs3751488	A	G	3	0.0009497	1.1865	MMP14	+	22375632	22386643	NM_004995
4	169745003	rs11935367	A	G	2	0.0009504	1.2161	PALLD	+	169654791	170086183	NM_001166108
15	61473380	rs1002175	A	G	3	0.0009511	0.8605	Intergenic
5	26824119	rs12522491	A	G	2	0.0009513	0.8376	Intergenic
1	91860110	rs4658104	A	G	3	0.0009525	1.2651	Intergenic
12	28681507	rs17530372	G	A	2	0.0009525	0.7717	Intergenic
19	40499685	rs11666282	T	C	3	0.0009528	1.1818	MAG	+	40474828	40496549	NM_080600
1	199687705	rs7553988	A	G	2	0.0009529	1.2115	Intergenic
2	200845276	rs1347552	G	A	3	0.0009568	0.8603	Intergenic
3	10139722	rs3774208	G	T	3	0.0009568	0.8044	BRK1	+	10132332	10143874	NM_018462
4	183421346	rs12648007	T	G	2	0.000957	0.71	Intergenic
1	26914301	rs4589135	C	T	2	0.0009575	1.2207	ARID1A	+	26895108	26981188	NM_006015
7	10139174	rs17162693	G	A	2	0.0009577	0.7958	Intergenic
13	40935920	rs9532824	C	T	3	0.0009577	0.769	RGCC	+	40929541	40943013	NM_014059
8	43566392	rs7463498	G	A	2	0.0009587	0.5893	Intergenic
1	87635175	rs11162001	T	C	3	0.0009591	1.2143	Intergenic
3	43743022	rs9831161	A	G	3	0.0009609	0.7458	ABHD5	+	43707378	43739221	NM_016006
12	60816420	rs1245443	G	A	2	0.0009609	1.19	FAM19A2	-	60388295	60872887	NM_178539
5	133361887	rs11954900	C	T	2	0.000961	1.2908	VDAC1	-	133335464	133368723	NM_003374
16	7954686	rs1395592	T	C	3	0.0009611	0.8225	Intergenic
3	155006291	rs1910590	T	C	2	0.0009612	0.8332	Intergenic
21	21583620	rs2826769	A	G	3	0.0009614	0.6032	NCAM2	+	21292503	21834388	NM_004540
21	21583620	rs2826769	A	G	3	0.0009614	0.6032	RNU6-67P	+	21579692	21579973	NR_046937
10	16097893	rs1341562	G	A	3	0.0009617	0.8659	Intergenic
8	52273435	rs7841709	A	G	2	0.0009619	0.8156	Intergenic
12	54333974	rs7302443	T	G	2	0.0009624	0.8009	Intergenic
1	115329812	rs7526486	T	C	2	0.0009626	1.4103	SYCP1	+	115198977	115339513	NM_003176
4	186799871	rs3749579	A	G	2	0.0009626	1.1924	SORBS2	-	186743591	187114864	NM_001270771
11	77686379	rs4944196	A	G	2	0.0009634	0.7869	GAB2	-	77603983	77806516	NM_080491
16	12614920	rs4780464	A	G	3	0.0009647	1.261	Intergenic
5	106839544	rs25994	T	C	2	0.0009648	1.2154	EFNA5	-	106740488	107034495	NM_001962
6	88427676	rs715207	A	C	2	0.000965	1.3566	ORC3	+	88356503	88433891	NM_012381
14	20140666	rs12323741	G	A	3	0.000966	0.8371	Intergenic
9	14727506	rs10961689	T	G	2	0.0009665	0.8237	FREM1	-	14724663	14900993	NM_144966
13	58415776	rs2321867	C	G	2	0.0009665	1.2607	Intergenic
11	121319906	rs1789839	G	A	2	0.0009667	1.2194	Intergenic
1	87654801	rs10873844	T	C	3	0.0009674	1.2133	Intergenic
2	185194579	rs359884	T	C	3	0.0009698	0.8692	ZNF804A	+	185171337	185512459	NM_194250
7	26359251	rs6967109	G	A	3	0.0009702	1.2551	SNX10	+	26298039	26380474	NR_037670
11	98883466	rs7950260	C	A	3	0.0009702	1.5318	CNTN5	+	98396915	99734826	NM_014361
12	116425379	rs11068519	A	C	2	0.0009707	1.279	KSR2	-	116375199	116890411	NM_173598
8	52309594	rs7836612	A	G	2	0.0009712	0.8147	Intergenic
21	35719891	rs2834932	C	T	3	0.0009713	0.8536	LOC100506403	-	35666674	35874932	NR_073512
14	67118870	rs17249299	T	C	3	0.0009738	0.7794	PLEKHH1	+	67069760	67126008	NM_020715
16	7677837	rs8045076	G	A	2	0.000974	0.8338	RBFOX1	+	6009132	7703341	NM_018723
2	6789300	rs1870744	C	T	2	0.0009741	1.3366	LINC00487	-	6786750	6827893	NR_038369
7	26368038	rs7782538	T	C	3	0.0009745	1.2019	SNX10	+	26298039	26380474	NR_037670
4	143674737	rs6835296	A	C	2	0.0009756	1.2247	INPP4B	-	143168631	143987054	NM_003866
3	72224413	rs11707080	A	G	3	0.0009758	1.1652	Intergenic
1	183789310	rs10798019	C	A	3	0.0009762	0.8473	Intergenic
7	37378581	rs4723645	T	C	3	0.0009763	1.1593	ELMO1	-	36859035	37455420	NM_001206480
15	98813561	rs12595207	C	T	2	0.0009767	1.2074	CERS3	-	98758122	98902448	NM_178842
11	67972530	rs632605	A	G	2	0.0009768	1.3798	LRP5	+	67836683	67973319	NM_002335
14	20140104	rs2319375	A	G	3	0.0009777	0.8365	Intergenic
4	114262565	rs17626532	C	T	2	0.0009784	0.8418	ANK2	+	113958687	114524345	NM_001127493
2	25563594	rs2055718	G	A	2	0.0009797	0.8118	DTNB	-	25453570	25726595	NM_001256308
6	22142936	rs17261417	T	C	2	0.0009816	1.2114	LINC00340	+	21774653	22302595	NR_015410
2	121183069	rs4848107	A	C	2	0.0009821	0.795	Intergenic
1	118532468	rs10923505	G	A	2	0.0009825	1.2199	SPAG17	-	118297810	118529371	NM_206996
5	149565598	rs9885318	T	A	2	0.0009825	0.8181	SLC6A7	+	149549712	149570828	NM_014228
12	10844324	rs2588350	T	C	2	0.0009841	1.2509	TAS2R7	-	10845397	10846493	NM_023919
6	5854163	rs7775306	A	G	3	0.0009844	0.8581	Intergenic
10	65010903	rs12768534	A	G	3	0.0009845	1.1506	REEP3	+	64951128	65054889	NM_001001330
1	89251662	rs4656078	T	C	2	0.0009862	1.1912	GBP3	-	89244947	89261137	NM_018284
21	42873147	rs453647	T	C	2	0.0009862	0.8387	SLC37A1	+	42792810	42874619	NM_018964
3	55920706	rs1110225	C	T	2	0.000987	0.827	ERC2	-	55517375	56477431	NM_015576
12	25321035	rs10743555	A	C	2	0.0009875	1.4505	Intergenic
6	11413216	rs4713379	G	A	3	0.0009877	0.8281	NEDD9	-	11291516	11490567	NR_073131
14	50434121	rs12589665	C	T	2	0.0009884	1.2773	ABHD12B	+	50408627	50441438	NM_001206673
5	87597521	rs33704	C	T	2	0.0009891	1.225	TMEM161B	-	87526778	87600421	NM_153354
5	87597521	rs33704	C	T	2	0.0009891	1.225	TMEM161B-AS1	+	87600454	87768247	NR_039993
12	25336389	rs10505978	G	A	2	0.0009895	1.4436	Intergenic
16	85748425	rs12598263	A	G	2	0.0009896	1.2071	Intergenic
14	50442356	rs2027341	A	G	2	0.0009905	1.2477	ABHD12B	+	50408627	50441438	NM_001206673
14	50442356	rs2027341	A	G	2	0.0009905	1.2477	PYGL	-	50441684	50480998	NM_002863
4	77306728	rs7664889	T	G	2	0.0009937	1.4629	SCARB2	-	77298914	77354076	NM_005506
2	127575888	rs873270	C	T	3	0.0009941	1.2015	BIN1	-	127522068	127581373	NM_139343
11	40033122	rs1462183	C	T	3	0.0009942	0.8625	Intergenic
11	121310102	rs1219446	C	A	2	0.0009947	1.2176	Intergenic
5	87602487	rs33703	T	C	2	0.0009948	1.2249	TMEM161B	-	87526778	87600421	NM_153354
5	87602487	rs33703	T	C	2	0.0009948	1.2249	TMEM161B-AS1	+	87600454	87768247	NR_039993
2	6798435	rs11681428	C	T	2	0.0009949	1.3377	LINC00487	-	6786750	6827893	NR_038369
2	234647740	rs250973	A	G	3	0.0009975	1.1674	SPP2	+	234624084	234650515	NM_006944
9	113672694	rs7858428	T	C	2	0.0009976	0.7209	Intergenic
12	17446556	rs1163983	T	G	2	0.0009981	0.7696	Intergenic
1	19455917	rs2073102	C	G	2	0.0009982	0.7926	MRTO4	+	19450661	19459209	NM_016183
9	18628211	rs702205	C	G	2	0.0009992	0.8158	ADAMTSL1	+	18464078	18900947	NM_001040272
4	189199228	rs4482824	T	G	2	0.0009996	0.8338	Intergenic
2	182712983	rs17649232	C	T	3	0.0009998	1.3127	PDE1A	-	182713006	183095817	NM_001258312
11	100881273	rs7932871	G	A	3	0.001	1.1511	TRPC6	-	100827504	100959869	NM_004621
20	12804917	rs10485763	G	T	3	0.001	1.3604	Intergenic
4	7761540	rs766008	C	A	2	0.001002	1.2204	SORCS2	+	7245274	7795464	NM_020777
4	94248512	rs4693305	C	T	3	0.001002	0.8665	GRID2	+	93444572	94912672	NM_001510
7	89215883	rs6980440	C	T	3	0.001002	1.2254	Intergenic
14	61318278	rs8021670	T	C	3	0.001002	0.7929	SNAPC1	+	61298827	61332899	NM_003082
20	34283333	rs3813918	C	T	2	0.001002	0.8046	EPB41L1	+	34142839	34284135	NM_001258331
20	34283333	rs3813918	C	T	2	0.001002	0.8046	AAR2	+	34287752	34308277	NM_015511
21	31988005	rs2833482	A	C	3	0.001002	0.812	SCAF4	-	31965183	32026302	NM_020706
6	110644378	rs4947058	G	A	3	0.001004	0.7992	CDC40	+	110608316	110660115	NM_015891
8	5528551	rs2732986	C	A	3	0.001004	0.8579	Intergenic
5	36317382	rs11741164	C	T	3	0.001005	1.1572	RANBP3L	-	36284860	36337768	NM_001161429
3	120283094	rs2117768	G	T	3	0.001006	1.1515	IGSF11	-	120102168	120347588	NM_152538
6	24615740	rs2328824	G	A	3	0.001006	1.1529	ALDH5A1	+	24603175	24645414	NM_170740
13	101902225	rs9518730	T	C	2	0.001006	0.6507	Intergenic
1	108878546	rs7533905	T	G	2	0.001008	0.6752	Intergenic
13	53562410	rs9568977	A	G	3	0.001008	0.8671	Intergenic
2	121136454	rs7572268	A	G	2	0.001009	0.7888	Intergenic
4	55671208	rs3828550	A	G	2	0.001009	1.246	KDR	-	55639182	55686519	NM_002253
12	13846099	rs12303001	T	C	2	0.001009	1.2768	GRIN2B	-	13605676	14024289	NM_000834
13	92921964	rs2590545	C	T	2	0.00101	1.2678	GPC6	+	92677078	93858274	NM_005708
2	121182966	rs4848106	C	T	2	0.001011	0.7954	Intergenic
2	200851487	rs10931895	C	T	2	0.001013	1.2413	Intergenic
4	141021399	rs9999030	G	A	3	0.001014	0.6887	MAML3	-	140856995	141294683	NM_018717
8	92382558	rs13263714	A	G	3	0.001014	1.3601	SLC26A7	+	92330691	92479554	NM_052832
3	22742401	rs17395135	G	A	2	0.001015	0.7995	Intergenic
18	13422341	rs12458775	T	C	3	0.001015	1.1614	LDLRAD4	+	13208728	13642753	NM_181482
18	13422341	rs12458775	T	C	3	0.001015	1.1614	LOC100288122	-	13409497	13417533	NR_040031
4	409565	rs7666919	T	C	3	0.001017	0.8656	ABCA11P	-	409223	457998	NR_002451
5	137879091	rs3849046	T	C	3	0.001017	1.151	ETF1	-	137869680	137906888	NM_004730
11	59665203	rs1786140	T	C	2	0.001017	1.1985	Intergenic
1	48245803	rs17104021	A	G	2	0.001018	1.5077	Intergenic
14	68550134	rs761898	A	G	3	0.001018	1.1574	Intergenic
19	40489121	rs9304870	G	T	3	0.001018	0.8556	MAG	+	40474828	40496549	NM_080600
1	117831407	rs12407227	G	A	2	0.001019	1.347	MAN1A2	+	117711607	117869843	NM_006699
2	200842461	rs6739563	T	G	3	0.001019	1.2182	Intergenic
9	139772392	rs3123518	G	C	2	0.001019	0.501	EHMT1	+	139633264	139850399	NM_024757
9	139772392	rs3123518	G	C	2	0.001019	0.501	FLJ40292	+	139777294	139779045	NR_024341
10	61333643	rs1171826	G	A	3	0.001019	1.1587	CCDC6	-	61218511	61336420	NM_005436
8	2301798	rs4876151	G	T	2	0.00102	0.8372	Intergenic
14	50442340	rs2027342	C	T	2	0.00102	1.247	ABHD12B	+	50408627	50441438	NM_001206673
14	50442340	rs2027342	C	T	2	0.00102	1.247	PYGL	-	50441684	50480998	NM_002863
4	55665437	rs13109660	A	G	2	0.001021	1.2124	KDR	-	55639182	55686519	NM_002253
13	25884710	rs4770975	A	G	3	0.001021	0.7765	Intergenic
1	199436177	rs2365299	G	T	3	0.001022	0.8067	IGFN1	+	199426575	199464703	NM_001164586
1	44108976	rs2906458	G	A	2	0.001023	1.2203	ST3GAL3	+	43945790	44169424	NM_174963
10	56617236	rs12265891	G	T	3	0.001023	0.8556	Intergenic
22	30668005	rs3827334	C	A	2	0.001023	1.2698	C22orf24	-	30659506	30671336	NM_015372
22	30668005	rs3827334	C	A	2	0.001023	1.2698	YWHAH	+	30670478	30683590	NM_003405
4	40381991	rs6835691	C	T	2	0.001024	1.2575	Intergenic
6	116395737	rs554139	G	A	3	0.001024	1.1607	FRK	-	116369385	116488614	NM_002031
8	52303540	rs4873186	A	G	2	0.001024	0.8165	Intergenic
21	42873132	rs380161	T	G	2	0.001024	0.8392	SLC37A1	+	42792810	42874619	NM_018964
13	60621040	rs12430452	C	T	3	0.001025	1.4422	Intergenic
9	14727743	rs10511596	C	A	2	0.001027	0.8245	FREM1	-	14724663	14900993	NM_144966
6	134698860	rs229129	A	G	3	0.00103	1.1873	Intergenic
11	27327164	rs2291022	C	T	3	0.00103	1.1752	CCDC34	-	27316636	27341371	NM_030771
1	115300249	rs6696121	A	G	2	0.001031	1.4075	SYCP1	+	115198977	115339513	NM_003176
6	52981539	rs9474369	C	A	2	0.001031	0.7215	ICK	-	52974056	53034559	NM_016513
5	63528959	rs13355554	A	G	3	0.001033	0.8292	RNF180	+	63497426	63704452	NM_001113561
9	19468451	rs6475334	A	G	2	0.001035	1.2406	Intergenic
12	61431471	rs163682	T	C	2	0.001035	0.8227	PPM1H	-	61324030	61614932	NM_020700
2	197805608	rs7560201	C	T	2	0.001036	1.25	ANKRD44	-	197559630	197883766	NM_001195144
5	30864195	rs2055379	C	T	2	0.001036	0.814	Intergenic
5	30865434	rs2178491	T	C	2	0.001036	0.814	Intergenic
2	130826567	rs6750645	C	T	3	0.001038	0.8363	PTPN18	+	130830049	130849452	NM_014369
16	54953111	rs2550303	G	A	2	0.001039	1.1942	GNAO1	+	54782751	54948857	NM_020988
16	54953111	rs2550303	G	A	2	0.001039	1.1942	AMFR	-	54952864	55016951	NM_001144
2	121182826	rs4848104	A	C	2	0.00104	0.7959	Intergenic
3	78706807	rs9309807	G	A	2	0.00104	0.8402	Intergenic
8	52278072	rs2164763	T	G	2	0.001041	0.8168	Intergenic
8	118075752	rs3020119	T	C	2	0.001041	1.1934	SLC30A8	+	118031692	118258134	NM_001172811
16	84119792	rs4072443	A	G	3	0.001042	0.8575	Intergenic
7	20585122	rs17143109	C	T	3	0.001045	1.1779	Intergenic
4	103288279	rs11736681	A	G	2	0.001046	0.7759	Intergenic
2	56002979	rs2277886	G	C	2	0.001047	1.2639	EFEMP1	-	55946600	56004802	NM_001039348
4	120936415	rs7699214	A	G	2	0.001047	0.8352	Intergenic
7	87965678	rs17167685	T	G	2	0.001047	1.1973	Intergenic
16	77907243	rs8061628	A	G	3	0.001047	0.8435	Intergenic
2	121187279	rs2310943	A	G	2	0.001048	0.793	Intergenic
2	213081766	rs1384291	T	C	2	0.001048	1.2693	ERBB4	-	211948686	213111597	NM_005235
3	9530554	rs6807946	C	T	2	0.001049	1.4334	LHFPL4	-	9515044	9570486	NM_198560
4	460103	rs6599348	A	G	3	0.001049	0.8643	ABCA11P	-	409223	457998	NR_002451
4	460103	rs6599348	A	G	3	0.001049	0.8643	ZNF721	-	423772	482960	NM_133474
4	114230780	rs11735808	A	C	2	0.001049	1.2153	ANK2	+	113958687	114524345	NM_001127493
10	121202395	rs2297641	T	C	3	0.001049	1.2494	GRK5	+	120957186	121205121	NM_005308
13	24219872	rs17081092	T	G	2	0.001049	1.5092	Intergenic
11	40032639	rs7946936	C	T	3	0.00105	0.8432	Intergenic
12	130602381	rs7399173	A	G	2	0.00105	0.7241	Intergenic
9	93129441	rs2457715	T	C	2	0.001053	0.8407	AUH	-	93015917	93164027	NM_001698
3	153566933	rs7633673	A	G	2	0.001055	0.8376	MBNL1	+	153468518	153666258	NM_021038
22	39817164	rs5995992	C	T	2	0.001055	1.2175	MIR1281	+	39818462	39818516	NR_031694
22	39817164	rs5995992	C	T	2	0.001055	1.2175	EP300	+	39818559	39906027	NM_001429
1	100049627	rs7543433	C	T	3	0.001056	0.8494	Intergenic
1	9583648	rs9430184	A	G	2	0.001057	0.8047	TMEM201	+	9571518	9597522	NM_001130924
5	149563368	rs11749558	A	G	3	0.001057	0.8558	SLC6A7	+	149549712	149570828	NM_014228
9	75094968	rs10781135	C	T	2	0.001057	1.2003	Intergenic
12	97102748	rs12369175	G	A	2	0.001057	0.8114	Intergenic
3	67352810	rs4411829	A	C	2	0.001058	0.6804	Intergenic
6	40892839	rs6939170	A	G	2	0.001059	0.791	Intergenic
10	121206913	rs1999627	A	G	3	0.001059	1.249	GRK5	+	120957186	121205121	NM_005308
22	16734783	rs5992128	G	T	2	0.001059	1.9857	MICAL3	-	16650415	16887325	NM_015241
2	12028711	rs1595808	A	G	2	0.00106	0.783	Intergenic
8	139771875	rs10104531	T	C	3	0.00106	0.8658	COL22A1	-	139669659	139995418	NM_152888
4	188143360	rs4862752	C	T	3	0.001062	1.1991	Intergenic
6	15448450	rs12198692	C	G	2	0.001062	1.5954	JARID2	+	15354184	15630252	NM_004973
8	47851472	rs11136243	C	T	2	0.001063	0.828	Intergenic
12	54253285	rs11171569	G	C	2	0.001063	0.8131	OR2AP1	+	54254465	54255395	NM_001258285
3	67321711	rs6779845	G	A	2	0.001065	0.6796	Intergenic
8	48745517	rs7842068	A	G	3	0.001066	0.8644	KIAA0146	+	48336041	48811116	NM_001080394
4	109776962	rs2851340	T	G	2	0.001067	1.271	Intergenic
6	149307264	rs7769776	G	A	2	0.001067	0.8421	UST	+	149109963	149439819	NM_005715
4	127564123	rs2391055	G	C	2	0.001068	0.8316	Intergenic
3	67323837	rs4857000	G	A	2	0.001069	0.6797	Intergenic
3	67328393	rs6549776	A	G	2	0.001069	0.6797	Intergenic
5	30850387	rs2330607	C	T	2	0.001069	0.8144	Intergenic
5	30850626	rs2330608	C	A	2	0.001069	0.8144	Intergenic
2	213081233	rs10180614	T	C	2	0.00107	1.2687	ERBB4	-	211948686	213111597	NM_005235
17	70057452	rs783236	G	A	2	0.001071	0.8402	CD300C	-	70048799	70053905	NM_006678
17	70058560	rs1699567	G	A	2	0.001071	0.8402	CD300C	-	70048799	70053905	NM_006678
2	117624548	rs1545123	G	A	2	0.001072	1.1913	Intergenic
3	119982183	rs705225	C	T	2	0.001072	1.2667	Intergenic
5	27595983	rs10036200	A	C	3	0.001074	1.158	Intergenic
1	145462671	rs12117447	A	G	2	0.001075	1.2479	Intergenic
3	6266533	rs1025620	G	C	2	0.001075	1.193	Intergenic
10	82662206	rs4933622	A	G	3	0.001075	1.1727	Intergenic
2	5562652	rs12614734	T	C	2	0.001076	0.8235	Intergenic
3	153476864	rs13072540	C	A	2	0.001078	0.8367	MBNL1	+	153468518	153666258	NM_021038
3	67323598	rs4856999	A	G	2	0.001079	0.6799	Intergenic
8	118077402	rs2938863	T	C	2	0.001079	1.1928	SLC30A8	+	118031692	118258134	NM_001172811
2	121693112	rs17794420	A	G	2	0.00108	1.2235	TFCP2L1	-	121690633	121759248	NM_014553
10	63199744	rs2448396	T	C	3	0.00108	0.7407	C10orf107	+	63092724	63196097	NM_173554
18	43174538	rs2187402	A	C	2	0.001081	1.2079	Intergenic
6	39974268	rs3004069	A	G	2	0.001082	0.8446	DAAM2	+	39868136	39980631	NM_001201427
17	8900405	rs4063993	T	C	3	0.001082	1.1801	NTN1	+	8865583	9088042	NM_004822
22	39870225	rs9611505	C	T	2	0.001082	1.213	EP300	+	39818559	39906027	NM_001429
1	118908135	rs17257972	G	A	3	0.001083	0.8698	Intergenic
11	77780118	rs7112234	A	G	3	0.001083	0.8312	GAB2	-	77603983	77806516	NM_080491
12	48852925	rs7397849	T	C	2	0.001083	1.2555	LIMA1	-	48855829	48963620	NM_001113546
15	93284382	rs11637458	C	T	3	0.001084	0.8555	Intergenic
8	109390173	rs12056875	C	T	2	0.001085	0.8052	Intergenic
15	53088684	rs12594729	A	G	3	0.001085	1.1511	Intergenic
22	39726299	rs7287939	C	T	3	0.001085	1.3325	Intergenic
7	34851657	rs13231258	T	C	2	0.001088	1.3491	NPSR1	+	34664421	34884469	NM_207173
17	29014498	rs17783142	G	T	2	0.001088	0.7538	ASIC2	-	28364218	29507938	NM_001094
18	74708523	rs9957751	A	G	3	0.001088	0.8549	Intergenic
5	137846077	rs6890204	T	C	3	0.001089	0.8697	Intergenic
8	14979036	rs17120860	A	C	2	0.001089	0.7798	SGCZ	-	13991743	15140163	NM_139167
11	77705106	rs4945265	A	G	2	0.001089	0.7892	GAB2	-	77603983	77806516	NM_080491
2	198824811	rs1471085	A	T	2	0.001092	0.7809	Intergenic
2	213075518	rs10178687	A	G	2	0.001093	1.2682	ERBB4	-	211948686	213111597	NM_005235
8	52265040	rs10958248	G	A	2	0.001093	0.8183	Intergenic
12	116484194	rs11068542	T	A	2	0.001093	0.8338	KSR2	-	116375199	116890411	NM_173598
11	40037806	rs11035666	A	G	2	0.001095	0.8315	Intergenic
12	89973205	rs1920775	A	G	2	0.001095	2.0331	KERA	-	89968401	89976262	NM_007035
4	77313082	rs13111705	G	A	2	0.001096	1.4594	SCARB2	-	77298914	77354076	NM_005506
6	39972708	rs3008815	T	C	2	0.001098	0.8436	DAAM2	+	39868136	39980631	NM_001201427
1	189687283	rs2135942	T	G	2	0.001099	1.5754	Intergenic
8	118086024	rs2047963	C	T	2	0.001099	1.192	SLC30A8	+	118031692	118258134	NM_001172811
8	118086468	rs3019879	A	G	2	0.001099	1.192	SLC30A8	+	118031692	118258134	NM_001172811
10	82661074	rs7901052	A	G	3	0.001099	1.1725	Intergenic
8	118029328	rs2921722	C	A	3	0.001101	1.1572	AARD	+	118019644	118025420	NM_001025357
8	118029328	rs2921722	C	A	3	0.001101	1.1572	SLC30A8	+	118031692	118258134	NM_001172811
2	177091837	rs11885271	T	C	2	0.001102	0.8393	Intergenic
9	14731876	rs989615	A	G	2	0.001103	0.8262	FREM1	-	14724663	14900993	NM_144966
20	9938575	rs12480468	T	C	2	0.001105	0.805	Intergenic
1	9581294	rs9430182	G	A	2	0.001106	0.8054	TMEM201	+	9571518	9597522	NM_001130924
3	67331966	rs4857001	G	A	2	0.001106	0.6804	Intergenic
8	4471483	rs1155851	A	G	3	0.001106	0.854	CSMD1	-	2780281	4839736	NM_033225
8	2904881	rs17079217	C	T	3	0.001107	1.1669	CSMD1	-	2780281	4839736	NM_033225
8	47165297	rs10866884	C	T	2	0.001108	0.8259	Intergenic
6	40210569	rs4573070	T	A	2	0.00111	0.822	Intergenic
4	176913760	rs10016635	G	A	2	0.001111	1.5587	GPM6A	-	176791081	177160836	NM_005277
22	35603688	rs11552115	A	G	2	0.001111	1.5192	NCF4	+	35586975	35604005	NM_000631
4	55666603	rs2305945	T	G	2	0.001112	1.2132	KDR	-	55639182	55686519	NM_002253
3	572064	rs9816725	A	G	3	0.001113	0.7076	Intergenic
11	77801479	rs10899496	C	T	3	0.001113	0.8308	GAB2	-	77603983	77806516	NM_080491
9	10010251	rs16930828	G	A	2	0.001114	0.841	PTPRD	-	8304245	10602723	NM_002839
13	111652791	rs2146443	G	A	3	0.001115	1.1815	Intergenic
10	63153530	rs12573444	C	A	2	0.001117	0.8224	C10orf107	+	63092724	63196097	NM_173554
10	64633455	rs4379723	C	T	3	0.001117	0.8705	JMJD1C	-	64596993	64895728	NM_032776
5	133353680	rs11242200	G	A	2	0.001118	1.2877	VDAC1	-	133335464	133368723	NM_003374
12	107702132	rs3741781	A	C	2	0.001118	1.4142	SSH1	-	107700594	107775488	NM_018984
11	77707694	rs7116611	C	T	2	0.001119	0.7897	GAB2	-	77603983	77806516	NM_080491
12	17463509	rs1305295	A	G	2	0.001119	0.7716	Intergenic
20	9957227	rs12481420	G	A	2	0.001119	0.8023	SNAP25-AS1	-	9952459	10148154	NR_040710
10	82660606	rs12245456	T	C	3	0.001122	1.1721	Intergenic
13	41088174	rs17594523	C	A	2	0.001122	0.6055	VWA8	-	41038960	41433221	NM_015058
15	51686480	rs10152972	T	C	3	0.001127	1.1675	WDR72	-	51593229	51842367	NR_102334
1	49819328	rs4926538	A	G	2	0.001128	0.683	AGBL4	-	48771113	50262213	NM_032785
12	93758409	rs6538555	G	A	2	0.001129	1.2127	Intergenic
3	82004619	rs9812141	G	A	2	0.00113	1.2589	Intergenic
9	5882375	rs2233177	A	G	2	0.00113	1.6112	MLANA	+	5880908	5899822	NM_005511
9	5882525	rs2233178	T	C	2	0.00113	1.6112	MLANA	+	5880908	5899822	NM_005511
6	147071738	rs1576088	T	C	2	0.001132	0.8173	ADGB	+	146961828	147178290	NM_024694
11	40580985	rs982155	C	T	3	0.001132	0.8695	LRRC4C	-	40092325	41437762	NM_001258419
1	160357908	rs12140791	T	C	2	0.001133	0.6876	NOS1AP	+	160306204	160606437	NM_014697
7	37393277	rs12532031	T	G	3	0.001133	1.1595	ELMO1	-	36859035	37455420	NM_001206480
10	12811686	rs7077423	C	T	3	0.001133	1.165	CAMK1D	+	12431588	12911739	NM_153498
9	138408197	rs11145861	A	G	2	0.001135	0.7813	SNAPC4	-	138389849	138412710	NM_003086
5	30063340	rs1896699	T	C	2	0.001137	0.839	Intergenic
13	57591791	rs7323027	A	G	3	0.001138	1.1587	Intergenic
16	77996536	rs17711743	A	G	3	0.001138	0.8127	Intergenic
1	160191373	rs2341471	A	G	2	0.001139	0.8402	ATF6	+	160002657	160200484	NM_007348
2	76336938	rs17753876	C	A	2	0.001139	1.2438	Intergenic
5	106845986	rs27853	C	G	2	0.001139	1.194	EFNA5	-	106740488	107034495	NM_001962
17	32307130	rs754456	G	T	2	0.001139	0.8342	Intergenic
6	5853214	rs9502375	A	G	2	0.00114	0.8301	Intergenic
10	61396876	rs1684895	C	A	2	0.00114	1.1918	Intergenic
10	64877024	rs10509186	T	C	3	0.00114	0.8723	JMJD1C	-	64596993	64895728	NM_032776
5	103701379	rs349587	A	G	3	0.001141	1.1738	Intergenic
6	91249278	rs791059	G	A	2	0.001142	0.834	Intergenic
12	127129208	rs9739748	A	G	2	0.001143	0.7468	Intergenic
15	61482191	rs768128	G	T	3	0.001144	0.8492	Intergenic
17	19778128	rs850622	T	C	2	0.001144	1.2305	AKAP10	-	19748356	19821761	NM_007202
4	86386910	rs6842135	C	A	2	0.001145	1.3529	Intergenic
18	71898637	rs9973170	C	G	2	0.001145	1.2214	Intergenic
2	29340607	rs13411869	C	A	2	0.001146	0.6277	ALK	-	29269143	29997981	NM_004304
3	66916127	rs6768767	A	G	2	0.001146	0.779	Intergenic
5	87781138	rs10074877	T	C	2	0.001146	1.2179	Intergenic
5	62430123	rs1160346	G	A	3	0.001148	1.1567	Intergenic
10	61395919	rs723212	G	A	3	0.001149	0.8688	Intergenic
2	26058144	rs6721440	G	A	2	0.00115	0.8128	KIF3C	-	26002958	26058947	NM_002254
8	47255860	rs11136146	G	C	2	0.00115	0.8272	Intergenic
7	18769112	rs6979341	A	T	2	0.001151	0.5463	Intergenic
8	118071988	rs6469667	A	G	2	0.001152	1.1916	SLC30A8	+	118031692	118258134	NM_001172811
3	126836180	rs10512654	T	C	3	0.001153	0.7002	Intergenic
11	44336365	rs4755819	G	A	3	0.001155	0.8636	Intergenic
11	128292246	rs2846675	C	T	2	0.001155	1.2631	KCNJ5	+	128266522	128293161	NM_000890
3	82001389	rs7635332	T	G	2	0.001156	1.2569	Intergenic
5	101346429	rs10039226	C	G	2	0.001156	0.7686	Intergenic
7	98025145	rs2251769	C	T	2	0.001157	0.8439	Intergenic
10	70108629	rs7071780	G	A	2	0.001157	1.2632	TET1	+	69990122	70124245	NM_030625
1	9579158	rs4074744	G	T	2	0.001158	0.8061	TMEM201	+	9571518	9597522	NM_001130924
5	73418739	rs7735553	G	A	3	0.001158	0.8618	Intergenic
12	93762187	rs6538556	C	T	2	0.001158	1.2122	Intergenic
8	13786669	rs12547223	T	C	3	0.001159	1.191	Intergenic
1	192585763	rs6683050	T	A	2	0.00116	1.3295	Intergenic
5	30850019	rs9292400	A	G	2	0.00116	0.8156	Intergenic
4	88886961	rs2627680	T	C	2	0.001162	0.8254	Intergenic
7	133883155	rs889877	T	C	2	0.001163	1.1859	AKR1B15	+	133884388	133915132	NM_001080538
9	14725694	rs1494343	A	G	2	0.001163	0.8277	FREM1	-	14724663	14900993	NM_144966
10	64803828	rs7923609	G	A	3	0.001164	0.8725	JMJD1C	-	64596993	64895728	NM_032776
10	64803828	rs7923609	G	A	3	0.001164	0.8725	MIR1296	-	64802722	64802814	NR_031566
10	99412638	rs7905087	G	A	2	0.001164	1.1886	PI4K2A	+	99390432	99426177	NM_018425
10	109898890	rs11193918	C	T	3	0.001164	0.8033	Intergenic
4	86387020	rs2869329	A	G	2	0.001165	1.3523	Intergenic
6	161073517	rs4252134	C	T	2	0.001167	1.2091	PLG	+	161043214	161095075	NM_000301
1	160355955	rs10753758	A	G	2	0.001168	0.6883	NOS1AP	+	160306204	160606437	NM_014697
10	70129212	rs1782328	A	G	2	0.001168	1.2635	TET1	+	69990122	70124245	NM_030625
5	30066768	rs1428462	G	C	2	0.001169	0.8393	Intergenic
5	103754220	rs2963229	T	G	3	0.001169	1.1809	Intergenic
5	103769334	rs6596573	C	T	3	0.001169	1.1616	Intergenic
2	7759407	rs1656173	G	A	2	0.00117	0.832	Intergenic
5	87568014	rs193707	A	G	2	0.00117	1.2238	TMEM161B	-	87526778	87600421	NM_153354
2	100258948	rs6542923	C	T	2	0.001171	1.2047	LONRF2	-	100256184	100305627	NM_198461
12	130616643	rs10902443	G	A	2	0.001172	0.7594	Intergenic
6	147065343	rs2225137	T	C	2	0.001173	0.8178	ADGB	+	146961828	147178290	NM_024694
11	82193935	rs4274220	T	C	2	0.001173	1.2282	Intergenic
4	183763522	rs6818877	G	A	2	0.001174	0.816	TENM3	+	183482130	183961171	NM_001080477
18	43173325	rs1893784	C	T	2	0.001174	1.2062	Intergenic
4	111367112	rs9996503	T	C	2	0.001175	0.5149	Intergenic
8	48718383	rs2129617	G	A	2	0.001175	0.8406	KIAA0146	+	48336041	48811116	NM_001080394
15	72333092	rs351160	T	G	2	0.001175	1.3538	CCDC33	+	72315682	72415535	NM_025055
1	49829753	rs2883976	A	G	2	0.001177	0.6811	AGBL4	-	48771113	50262213	NM_032785
20	52126797	rs16998926	T	C	2	0.001177	0.7473	Intergenic
6	5847667	rs10155777	G	C	2	0.001178	0.8302	Intergenic
6	88443912	rs3763177	T	C	2	0.001178	1.3477	AKIRIN2	-	88441296	88468704	NM_018064
11	59693333	rs617135	A	G	2	0.001178	1.1891	MS4A6A	-	59695655	59708715	NM_152852
13	111048111	rs8001653	G	T	2	0.001181	0.8349	Intergenic
11	128727641	rs10894028	C	T	2	0.001182	0.8379	Intergenic
2	7754047	rs772434	G	A	2	0.001184	0.8341	Intergenic
4	86387098	rs2869331	A	C	2	0.001185	1.3517	Intergenic
1	188975767	rs12135407	A	C	3	0.001186	0.8408	LOC440704	+	188860642	189037411	NR_033922
4	72927997	rs10222695	G	A	3	0.001186	1.1507	Intergenic
9	84411005	rs10435944	T	G	2	0.001187	0.6817	Intergenic
11	15403390	rs4418790	T	C	2	0.001187	1.1956	Intergenic
5	101394315	rs7733434	T	C	2	0.001189	0.8215	Intergenic
11	6358174	rs10839561	G	C	2	0.001189	0.6967	Intergenic
4	18305690	rs1546658	A	G	2	0.00119	1.2618	Intergenic
10	61397121	rs10761422	A	T	2	0.00119	1.1906	Intergenic
8	78984117	rs17388515	A	G	3	0.001192	0.8288	Intergenic
16	85741819	rs8056012	A	G	2	0.001193	1.2092	Intergenic
4	27243309	rs12499725	T	C	3	0.001194	0.86	Intergenic
4	62499826	rs17226342	G	A	2	0.001194	1.4987	LPHN3	+	62045433	62620763	NM_015236
22	16828960	rs433576	A	G	3	0.001194	0.854	MICAL3	-	16650415	16887325	NM_015241
3	27980840	rs7431226	G	A	2	0.001195	0.7575	Intergenic
4	125670814	rs10029005	A	G	3	0.001196	1.153	Intergenic
5	67337932	rs13354232	A	G	3	0.001196	0.8039	Intergenic
5	95219068	rs2546194	G	A	3	0.001196	1.1763	C5orf27	+	95213691	95221592	NR_026936
6	167730703	rs4364453	G	A	2	0.001197	0.8358	Intergenic
2	185210269	rs2054548	C	T	3	0.001198	0.8714	ZNF804A	+	185171337	185512459	NM_194250
[truncated: 64,206 more rows]
